# Supplementary material
Source: publisher figshare collection journal article supplement (https://gsajournals.figshare.com/ndownloader/files/24096191)
Supplement: Supplementary file 1 [file 24096191]

Gene	Chr	Start	End	Strand	Length	KB10	KB12	KB1	KB2	KB3	KB5	NPZ11	NPZ1	NPZ29	NPZ33	NPZ6	NPZ8	logFC	logCPM	F	PValue	FDR
FBgn0011563	3	11843060	11844027	+;+	890	33	99	8	3	5	27	6	4	10	4	15	2	-2.328367334	-1.417130715	8.277230538	0.012653283	0.095617218
FBgn0012689	4_group1	3220194	3221639	-;-	1138	16	12	2	15	0	5	19	9	4	14	36	19	1.245939652	-1.904106276	2.707605937	0.12314829	0.355969088
FBgn0012690	2	19797982	19799406	-	1425	35	24	42	61	44	16	10	63	36	35	48	2	-0.236714183	-0.469506159	0.13469148	0.71935575	0.868955943
FBgn0012691	3	11853149	11869827	-;-;-	1705	63	82	41	73	47	27	100	80	143	23	112	53	0.263138341	0.405618536	0.599000687	0.452418881	0.702694174
FBgn0012692	3	11848863	11850514	+;+	1581	35	95	43	45	32	16	167	129	305	137	195	93	1.839841359	1.051311611	23.75984855	0.000279639	0.009460274
FBgn0012694	XR_group6	5063330	5064353	-;-;-	831	1391	1157	844	1434	781	610	2309	1422	1445	693	2165	850	0.365480627	4.538743631	7.124346886	0.018910115	0.120596116
FBgn0012695	2	19764373	19775837	+;+;+;+;+	2743	7	61	2	15	14	3	89	107	98	49	98	31	2.090845266	-0.134882337	9.943075121	0.007391471	0.069722888
FBgn0012696	XR_group6	2218309	2257987	-;-;-;-;-;-;-	3079	720	294	302	530	144	61	312	311	363	78	393	285	-0.414516387	2.491272648	1.702608695	0.213944189	0.479728044
FBgn0012698	Unknown_group_53	2866	4470	-;-	1513	12948	7834	5496	11159	3465	2852	9485	9365	10947	2528	12352	7483	0.043107602	7.170019926	0.062195052	0.806847408	0.912194576
FBgn0012699	2	26508265	26519970	-;-;-;-;-	2638	8	26	17	24	31	7	13	13	20	13	38	16	-0.226172341	-1.277387148	0.134975409	0.719074039	0.868863876
FBgn0012701	XR_group6	4030493	4034223	-;-	2664	175058	159392	91433	212090	63373	75488	188541	110931	172467	81727	192130	56728	-0.008890449	11.21494839	0.006138191	0.938711959	0.973579729
FBgn0012704	2	978926	979839	-;-;-	593	8672	5077	2964	7620	2683	2533	8153	5555	7503	2683	8572	3166	0.224597522	6.595943272	3.893136787	0.06950776	0.257045188
FBgn0012706	2	3840308	3842918	-;-;-;-;-;-	778	2277	1443	1264	1168	372	457	1260	1238	2953	211	1093	1126	-0.311511213	4.480896019	1.061658182	0.321993127	0.592472194
FBgn0012707	4_group1	3627560	3639948	-;-;-;-;-	2543	204	56	32	220	13	31	186	119	131	81	127	58	0.692505451	0.865732164	2.580288043	0.13153596	0.369170388
FBgn0012708	2	14856260	14857789	+;+;+;+	1340	31	108	5	26	13	27	70	37	54	42	96	31	0.591582098	-0.202645428	1.119079637	0.308842854	0.581267861
FBgn0012710	XR_group8	4662508	4671926	-;-	1392	314	120	82	211	82	85	499	321	396	208	514	117	1.283021635	2.123724461	43.10324639	1.57E-05	0.001465328
FBgn0012711	2	19707160	19733949	+;+;+;+	4090	5	6	4	1	2	10	6	29	12	11	16	6	1.351110005	-2.21994954	2.928750909	0.11008432	0.33488161
FBgn0012714	2	4802689	4820857	-;-;-	4439	237	336	201	577	242	232	369	427	298	177	417	208	-0.041106069	2.594333001	0.021878471	0.884616752	0.949333144
FBgn0012716	4_group3	1666334	1667556	+;+	1161	7789	4498	5329	5496	707	838	5008	3766	4343	534	3443	3332	-0.545020058	6.044325296	2.584880703	0.134587544	0.374029997
FBgn0012717	4_group1	3626837	3637808	+;+;+;+;+;+;+	4768	2137	1310	1199	1962	560	663	1484	1113	1554	666	1744	587	-0.20624097	4.494928318	3.034355252	0.10444566	0.324310819
FBgn0012723	2	19689018	19693691	-;-;-	1802	90	19	0	30	31	33	29	32	21	28	30	4	0.424448844	-0.770171754	0.339731481	0.569678133	0.785087008
FBgn0012725	4_group2	127203	135762	+;+;+;+;+;+;+;+;+;+;+	4432	6094	2870	2459	5010	1421	1584	3876	3533	4267	1820	4785	2278	0.07267939	5.915581347	0.276899812	0.60735343	0.808874871
FBgn0012727	2	19882816	19898600	+;+;+	2470	0	56	2	10	22	2	4	17	21	6	17	55	-0.237476949	-1.262144714	0.040880457	0.84282829	0.930373476
FBgn0012733	2	26316997	26319228	+;+;+;+;+	1667	26	11	18	33	22	7	393	24	18	19	251	23	2.287439634	0.147233237	10.8632889	0.005596322	0.059247084
FBgn0012735	XL_group1e	605420	612887	-;-;-;-;-;-;-;-;-;-	4539	849	306	233	321	185	122	389	442	518	184	599	309	0.257970811	2.756307075	0.887846651	0.362764867	0.629704244
FBgn0012736	2	11261434	11267181	-;-;-;-;-	4530	136	421	320	506	174	120	400	456	534	139	464	329	0.15740728	2.668808606	0.327420517	0.576670542	0.789408169
FBgn0013863	XL_group1e	4239101	4244756	+;+	2081	38	0	0	10	10	18	16	0	1	1	69	5	1.158778319	-1.863926603	0.463908729	0.507486891	0.744715577
FBgn0014783	XL_group1e	1775886	1778130	+;+;+;+	1889	31686	45727	21117	43035	18283	17659	44336	21562	28659	12722	30208	13683	-0.367643328	8.987467564	5.581943699	0.033908739	0.171295558
FBgn0015144	XR_group6	2520516	2522372	+;+	1801	96	7	63	71	22	23	39	8	23	32	23	36	-0.576151961	-0.40866076	0.858673656	0.37052406	0.637895542
FBgn0015151	2	972505	973262	-;-;-	638	7333	6071	3783	8434	2652	2280	7206	3758	5187	2501	6952	2561	-0.174942253	6.45583995	3.033187626	0.104506053	0.324310819
FBgn0016313	XR_group6	10665637	10666757	+;+	742	4071	2760	2345	4480	1583	1765	3612	3285	4341	1368	4532	1860	-0.007439999	5.783860143	0.004029883	0.950321831	0.978158159
FBgn0018538	Unknown_group_10	27774	42451	+;+;+;+;+;+;+;+;+;+	4213	0	4	0	16	2	0	30	25	6	6	4	13	2.070623528	-2.325297	4.116191312	0.062860143	0.241872392
FBgn0018547	4_group4	1696626	1731148	+;+;+;+	4365	1159	654	720	626	240	229	948	688	895	277	1214	512	0.11719346	3.610193696	0.436937705	0.519824689	0.752892186
FBgn0020475	3	4596660	4601131	-;-;-	2877	227	93	176	220	78	100	205	141	117	60	139	65	-0.437394519	1.356025053	2.632981226	0.127981698	0.363080395
FBgn0022538	XL_group1a	6345060	6352048	+;+;+;+;+	6527	3399	2278	1864	3510	1130	1145	2823	2259	3063	1248	3123	917	-0.067516495	5.330699574	0.327590563	0.576572762	0.78934789
FBgn0022854	XL_group1e	7639075	7641527	-;-;-	2311	4922	3592	1949	5347	1472	1642	4929	2988	3441	2586	5134	1456	0.18045254	5.888637182	2.297866714	0.152816643	0.400774958
FBgn0023293	3	19626282	19626880	+	599	2618	1884	1487	2445	602	775	1781	1569	1905	641	1965	1094	-0.254344829	4.827583486	4.65282208	0.049734859	0.211297619
FBgn0023294	2	1547299	1548782	+;+;+	1294	12202	9962	6528	13715	5063	4817	12926	7856	8679	4541	13140	4751	-0.094085684	7.30695933	1.250880734	0.283063398	0.555678206
FBgn0023295	XR_group6	6394614	6405002	+;+;+;+;+;+;+;+;+	1983	2	5	15	0	2	15	28	21	4	5	37	16	0.839226415	-1.846441221	0.793503295	0.388780714	0.654273125
FBgn0023296	4_group3	8440970	8445068	-;-;-;-	2271	15863	10162	7207	13483	5036	4239	15353	11188	11068	4931	16218	5819	0.121378945	7.490641748	1.481341268	0.244597524	0.51456722
FBgn0023297	XL_group1e	10406673	10409159	-;-	1178	23047	10576	11908	24263	8263	7957	21618	15237	23655	9025	22827	7455	0.150263719	8.128985247	1.185212014	0.295518924	0.56780304
FBgn0027807	XL_group1a	353231	355287	+;+;+	1939	952	1173	339	615	559	491	1516	845	1208	514	1481	418	0.396607421	3.957591133	2.733019264	0.121553727	0.353185267
FBgn0046148	4_group4	6373349	6378866	-;-;-;-	2517	102	66	61	96	45	19	176	58	97	74	215	96	0.841118997	0.785704294	6.396376306	0.024730701	0.141648299
FBgn0061260	3	16596678	16602227	+;+;+;+;+;+;+	1824	674	608	233	1024	203	191	603	687	432	227	1011	482	0.173361241	3.251060542	0.406687726	0.534417601	0.763001002
FBgn0061261	3	16611769	16612510	-	742	13217	8080	6899	9255	3736	4538	10578	6345	6936	4700	12352	5035	-0.046708211	7.143797769	0.128935544	0.725141447	0.872319799
FBgn0061263	3	8213360	8214735	+	1376	420	206	213	468	68	222	942	505	611	311	694	269	1.028788289	2.883955972	17.56294851	0.000995809	0.02057025
FBgn0062298	3	10926536	10974229	+;+;+;+;+;+;+;+;+;+;+;+	3308	3512	3679	1331	3460	1414	1505	3298	1878	2754	1483	2883	1264	-0.13721244	5.455940738	0.908075005	0.357525037	0.625115502
FBgn0062741	2	27188421	27204264	-;-;-;-	3557	475	342	259	474	231	158	478	276	352	115	346	105	-0.363928661	2.454645744	3.557404031	0.081175441	0.280655298
FBgn0064047	XL_group1e	9829482	9834834	+;+;+;+	4549	1227	755	643	1557	308	430	1371	1078	1061	436	1555	690	0.245309106	4.051638235	2.399686513	0.144682651	0.389328343
FBgn0064414	3	16563592	16568260	-;-;-	4555	2219	1499	917	2271	723	770	3203	2310	3436	1604	3285	1310	0.86494111	5.158020792	61.48327091	2.32E-06	0.000400042
FBgn0064416	2	14863380	14866015	+;+;+	2425	3879	4452	2034	4830	1328	2380	3387	2349	2368	1651	3709	1396	-0.381589343	5.712877476	5.42549047	0.036102183	0.177391872
FBgn0064417	3	15114990	15131078	+;+;+;+;+;+;+;+	3696	255	155	104	230	159	96	185	152	166	59	247	60	-0.328499557	1.545543604	1.521757881	0.238585799	0.507621271
FBgn0064419	2	26320480	26325939	-;-;-;-;-;-;-;-;-;-	4482	6290	5753	4946	7325	3386	3978	8445	4778	5711	2923	7722	2526	-0.155952803	6.640350236	1.434838419	0.251766201	0.523826348
FBgn0064420	2	27816384	27819046	-;-;-;-;-;-;-;-;-;-;-;-	1984	14587	12226	5710	13304	6222	5295	13245	6742	7129	4326	10950	3802	-0.346722589	7.301514526	9.694384087	0.007985955	0.07267021
FBgn0064421	XR_group8	4672304	4674174	+	1871	1154	751	531	795	329	406	665	508	761	321	691	316	-0.338442961	3.484547158	5.729181501	0.031986411	0.16588433
FBgn0064422	3	2436588	2439141	-;-;-	2402	36	20	18	10	16	6	38	24	19	16	60	13	0.529561429	-1.139288041	1.215098879	0.289758516	0.562884609
FBgn0064423	3	10880912	10883925	-;-;-;-	1540	1614	844	795	1643	967	852	1440	806	900	650	1458	585	-0.212864908	4.336842753	1.512987861	0.239873512	0.50868255
FBgn0064424	2	26326741	26329010	-;-;-;-	2102	155	97	127	285	145	83	232	181	193	130	339	79	0.290681946	1.69260095	1.056814195	0.322169961	0.592495538
FBgn0064425	2	27801389	27802741	-;-;-	1233	468	227	200	593	159	77	282	187	347	136	449	95	-0.210905219	2.22501811	0.611958927	0.447675285	0.699316667
FBgn0064426	2	26340528	26342279	-;-;-	911	13168	10467	5947	12822	5080	6386	14488	8086	9282	5013	13861	4444	-0.040836715	7.37869547	0.170924673	0.685841147	0.849515961
FBgn0064427	2	26342311	26344067	+;+	1689	7424	4302	3194	7439	2197	2446	6181	4577	6580	2354	6708	1858	0.002911601	6.353583395	0.000526397	0.982034113	0.992408478
FBgn0064431	3	10878499	10880523	-;-;-;-	1478	93	30	5	54	35	21	230	82	106	79	142	72	2.003663067	0.553764091	23.32100219	0.000303626	0.009998567
FBgn0064435	3	10884724	10898671	-;-;-;-;-;-;-;-	5504	805	540	608	825	268	200	658	503	698	284	877	381	-0.060918094	3.341894406	0.164661924	0.691314913	0.851933389
FBgn0064437	2	14834341	14835631	+;+	708	32	41	20	0	6	58	19	19	24	3	18	11	-1.27657043	-1.099283374	1.767383366	0.205929372	0.469640479
FBgn0064438	2	14855029	14856187	+;+;+	1028	22952	20252	11599	23209	10594	9761	25569	12444	14225	10037	23487	10513	-0.068954368	8.243085802	0.301919085	0.591735431	0.7995233
FBgn0064439	2	14860757	14861501	-;-	670	2097	426	674	896	116	170	1315	662	884	283	1126	1090	0.299520742	3.844211883	0.421166656	0.528874615	0.759294377
FBgn0064440	2	14868369	14870473	-	2105	83	91	68	116	45	106	74	19	22	20	43	21	-1.506061545	0.277320165	14.82759292	0.00190762	0.030471142
FBgn0064441	3	10921061	10922454	+;+;+	1268	34054	26585	17899	28259	11747	11176	39903	22908	22726	13569	39265	16959	0.17786597	8.763302091	2.449396328	0.140907517	0.383268086
FBgn0064442	XR_group8	4669806	4671191	+	1386	50261	44196	25438	46061	19163	25789	48785	24471	26214	18141	45733	17997	-0.28910353	9.254141161	4.86805652	0.045402924	0.201475205
FBgn0064443	3	10916600	10918227	-;-;-	1524	397	231	140	386	122	282	289	280	317	101	285	76	-0.287894695	2.180526403	0.922354496	0.35389293	0.621576832
FBgn0064444	3	10922465	10925337	-;-;-;-;-;-	1949	3339	1866	1612	2477	745	1113	1776	1498	1703	805	1954	567	-0.482385056	4.876908054	11.01410078	0.005353031	0.057681555
FBgn0064447	2	26329049	26330587	-;-;-	1394	973	390	382	793	237	297	809	663	680	236	746	369	0.124708215	3.307959595	0.455441484	0.511256199	0.746647554
FBgn0064448	3	10918623	10920458	-;-;-;-;-;-	1268	27839	20511	19331	25522	9995	13147	33455	19346	21150	12551	30859	14136	0.062857487	8.594138459	0.265753931	0.614606316	0.814098391
FBgn0067207	XR_group3a	121592	126759	-;-;-;-;-;-;-	3179	5199	3407	3150	5035	2010	2191	5518	3534	4294	1731	5478	1901	-0.056596474	6.048679097	0.330825438	0.574719115	0.787918216
FBgn0067543	Unknown_group_525	1974	3662	-;-;-	814	9850	8380	3842	8306	3399	2790	7705	3804	5860	2375	7271	2039	-0.413267339	6.602487995	9.866919507	0.007567888	0.070660888
FBgn0068730	XR_group8	2306546	2309100	-;-;-	2172	8679	6302	4715	8752	2828	2805	6910	5877	6133	2914	8458	4490	-0.048235086	6.726442636	0.194148797	0.666521169	0.838731164
FBgn0068743	XL_group1a	2456707	2462030	+;+;+;+;+;+;+	3604	6275	4932	3622	6176	2184	1997	6954	6480	7991	3297	7571	3214	0.417771808	6.531630632	16.62417296	0.001235718	0.023373779
FBgn0068744	XR_group8	8762641	8763509	-;-	801	1875	1012	1232	1352	291	213	502	519	1011	117	586	1216	-1.054982719	3.96011909	7.815949249	0.015761419	0.108441571
FBgn0070060	2	3438552	3446944	+;+;+;+	2503	79	66	91	42	10	15	82	63	115	23	119	42	0.266693297	0.196462664	0.618387367	0.445352294	0.697834833
FBgn0070061	2	15564061	15567819	+;+	3609	454	267	304	419	67	91	261	292	218	69	242	455	-0.285418896	2.340201026	0.668702976	0.427827182	0.68365769
FBgn0070062	2	22571525	22573522	-;-;-;-;-	1391	22	31	29	30	17	19	92	81	82	27	86	52	1.183162205	-0.11062101	11.50410207	0.00464304	0.05352616
FBgn0070063	XR_group6	745667	751419	-;-;-;-	2138	405	275	359	350	71	56	327	304	376	64	350	233	-0.161161188	2.252844082	0.474320998	0.50277409	0.741411601
FBgn0070064	2	22568549	22570276	-;-;-;-	1534	8859	6581	3593	7020	2803	1846	5069	4121	4813	2157	6121	2460	-0.351391104	6.377979583	6.964177082	0.020039474	0.124792985
FBgn0070065	2	15548383	15549606	+;+	1156	9107	7913	5242	7135	3324	4151	9799	5367	6768	3985	9855	3481	-0.016070221	6.880090283	0.019968363	0.889730979	0.951053776
FBgn0070066	2	3599451	3606636	+;+;+;+;+	6913	1253	1303	628	1613	615	805	2053	1164	1618	823	1925	417	0.280225241	4.433750986	2.76520208	0.119570645	0.350100894
FBgn0070068	2	22844908	22846581	+;+;+;+	1489	19690	16074	8295	18472	7377	7719	19581	9792	12125	6607	17374	5416	-0.185257284	7.809491927	4.015136635	0.065773164	0.248587355
FBgn0070069	4_group3	5195688	5205457	-;-;-;-;-	1945	126	113	157	531	118	122	323	457	266	99	325	1019	0.665209571	2.734467197	1.082486168	0.319205142	0.589915605
FBgn0070071	2	21230864	21234563	-;-	3644	3224	2596	1582	3459	1191	1268	3368	1818	2728	1161	3008	889	-0.118970661	5.301190363	1.297250122	0.274698469	0.548016356
FBgn0070072	4_group3	4972711	4995398	-;-;-;-;-;-;-;-;-;-;-	4439	132	57	54	52	3	4	38	69	37	16	36	12	-0.475703408	-0.395000473	0.602607343	0.451090309	0.701520899
FBgn0070073	4_group3	4940050	4953725	-;-;-;-;-	3034	332	209	271	291	118	85	323	329	270	142	436	209	0.24426104	2.236026334	1.431661828	0.252266059	0.524569107
FBgn0070075	4_group4	6033304	6035989	-;-;-;-;-;-;-;-	1316	234	144	160	368	125	122	267	313	335	27	345	252	-0.133935184	2.07462885	0.110726777	0.74447447	0.88213768
FBgn0070076	2	26568824	26570166	-	1343	14414	2750	5300	6522	1286	1938	5334	4326	6638	761	6871	2707	-0.547904227	6.370714386	1.885453291	0.195966324	0.456198668
FBgn0070079	4_group3	5071887	5108800	+;+;+;+;+;+;+;+;+;+;+	6224	8884	7102	5204	8634	3880	3865	6831	6444	6150	2699	8932	4487	-0.238372784	6.843245311	3.368436261	0.088778748	0.295466457
FBgn0070080	4_group4	6022302	6025237	-	2936	1250	443	561	1602	426	352	488	425	713	449	653	288	-0.454540337	3.55602711	3.439040135	0.085841372	0.289577989
FBgn0070082	3	8367704	8388063	+;+;+;+;+;+;+;+;+	2630	1395	1621	792	1786	663	680	2133	1033	1103	602	1660	477	-0.099609334	4.392193341	0.427214251	0.524433725	0.755812156
FBgn0070083	XR_group8	5131072	5134905	-	3834	210	86	65	150	132	39	100	275	185	29	216	192	0.157030157	1.458544348	0.070426362	0.794761969	0.906896825
FBgn0070084	2	22988795	22990926	-;-;-;-;-;-	1763	1140	757	558	1065	313	395	1007	593	1054	405	1011	404	0.016135384	3.714050322	0.016322482	0.900239632	0.955402809
FBgn0070086	XR_group3a	629687	631891	-;-;-	1505	261	91	53	289	126	117	104	280	172	162	441	332	0.839989335	2.036152479	2.389971807	0.146309526	0.39160268
FBgn0070087	2	22991389	22992391	-;-	931	5665	1374	1969	2555	615	909	2455	2068	2492	211	2573	1131	-0.578539802	5.091397552	1.97242413	0.186490952	0.442956477
FBgn0070089	4_group4	2603635	2619161	+;+;+;+;+;+;+;+;+;+;+;+;+	7030	1145	796	551	1642	348	494	1345	838	1096	581	1441	485	0.220676617	4.01032659	2.250778852	0.156771294	0.40673026
FBgn0070090	2	5424682	5425796	-;-	821	17529	15160	9930	17908	4535	7436	21202	14361	13679	7546	23406	9908	0.22016563	7.945604293	2.964171457	0.108152601	0.331545546
FBgn0070092	2	26506019	26507051	+;+	969	100	79	63	151	52	44	144	152	148	69	243	80	0.651250433	1.035625629	6.752634395	0.021654114	0.131093968
FBgn0070093	3	7420398	7424302	+;+;+;+;+;+;+	2658	0	70	56	82	4	12	63	31	46	11	29	23	-0.230050758	-0.555292026	0.09762235	0.759518153	0.890659367
FBgn0070094	3	8330705	8352819	-;-;-;-;-;-	3448	20	16	2	2	4	4	51	15	32	30	25	25	2.111237646	-1.34029363	11.38169122	0.004809622	0.054460648
FBgn0070095	2	26503357	26504319	+;+	912	381	129	279	342	218	181	604	376	546	200	534	167	0.470788399	2.619584033	3.150554927	0.098642159	0.313768769
FBgn0070096	2	26439935	26442401	-;-;-	2336	15933	11813	9627	16013	4806	6303	12585	8457	10634	5536	13349	5044	-0.283856566	7.520504932	10.21388674	0.00680163	0.066112208
FBgn0070097	2	26407686	26408638	-;-	876	1192	1804	874	2307	359	755	2449	1028	1575	711	1890	456	0.040489181	4.492247923	0.028671908	0.868094125	0.941263645
FBgn0070098	XR_group5	665504	672212	-;-;-;-;-	2092	4053	2059	1980	4016	1213	1140	2024	2437	1902	1219	2971	1681	-0.224744011	5.372130963	1.44655803	0.249933441	0.521189376
FBgn0070101	XR_group5	664136	665175	-;-	983	18663	16133	13870	20928	9063	9269	17966	11344	15619	7050	18063	4244	-0.40729823	7.966615867	8.90955883	0.010260637	0.084330151
FBgn0070102	XR_group5	658762	661469	-;-;-;-;-	2470	14327	12488	7570	14087	6007	6020	15441	8623	9922	5700	14516	4376	-0.132561283	7.505158498	2.197564109	0.161396171	0.412391364
FBgn0070105	2	26383538	26384754	-;-	1159	3474	2581	1333	3032	1269	895	2606	1815	2677	750	2610	856	-0.272743866	5.145234256	3.256241006	0.093700556	0.304195417
FBgn0070107	XR_group8	4479864	4483163	-;-	1339	1251	604	740	1321	338	304	850	967	1154	354	1285	742	0.080249674	3.915864059	0.18931189	0.670426045	0.840866552
FBgn0070108	3	3653021	3653655	+;+;+	382	8776	6956	3952	9866	3285	2868	8621	5517	9457	2515	8748	3815	-0.02212791	6.792919752	0.030625559	0.863698956	0.939779713
FBgn0070109	XR_group5	654002	657940	-;-;-	1899	824	574	525	913	265	292	758	730	787	325	922	624	0.176498175	3.559478361	1.250000334	0.283225567	0.555832546
FBgn0070110	3	7436956	7441359	+;+;+;+;+;+;+;+;+;+;+	2915	110	163	99	271	24	15	153	82	76	6	98	106	-0.68672139	0.830482015	1.96557079	0.183690584	0.440395627
FBgn0070111	XR_group5	651525	652713	-;-;-;-	949	972	775	502	430	380	330	769	529	759	229	655	366	-0.240029428	3.393937694	1.259813472	0.281425153	0.553843342
FBgn0070112	4_group4	2561348	2601680	+;+;+;+;+;+;+;+;+;+;+;+;+;+;+;+;+;+	6403	38936	33013	17428	36682	12591	18298	45374	24615	25213	17020	41374	15300	0.067259717	8.959851648	0.31688825	0.582794306	0.793961176
FBgn0070114	XR_group8	5005350	5007977	+;+;+	1848	548	145	322	389	218	185	270	287	139	58	258	186	-0.815333594	2.276504522	4.868568445	0.045393167	0.201475205
FBgn0070115	3	15697882	15733799	+;+;+;+;+;+	7225	778	703	540	736	279	263	872	789	781	412	1228	531	0.36346666	3.612519785	7.514923412	0.016453909	0.111184809
FBgn0070116	3	3018857	3025072	-;-;-;-;-;-;-;-;-	5677	24243	19121	13373	24439	11951	12015	29107	19775	18063	11743	28895	9778	0.078217987	8.436449956	0.533105425	0.477894358	0.722369834
FBgn0070117	3	7446462	7449721	+;+;+;+;+;+;+;+;+;+;+	2616	88	17	85	67	0	13	248	122	99	79	166	64	1.545350496	0.657900334	5.671139057	0.032967148	0.168706797
FBgn0070119	XR_group8	4025666	4028544	+;+;+;+;+	2610	2028	1482	1175	2299	702	824	2207	1500	2069	918	2296	909	0.141612664	4.808787022	2.196862339	0.161458298	0.412398823
FBgn0070120	4_group4	5990482	5995266	-;-;-;-;-;-	4193	4717	3163	2546	5020	1835	1748	3672	2656	3727	1832	4151	1506	-0.159894304	5.811521733	2.852738822	0.114374045	0.341425123
FBgn0070121	2	27041595	27043936	+;+;+	1851	172	166	278	284	17	43	169	194	297	6	260	309	-0.468916016	1.789793387	1.381902148	0.260272492	0.533102542
FBgn0070122	XR_group8	4036392	4047088	+;+;+;+;+;+;+	3453	21223	17329	9041	16581	7355	9284	16911	9948	10216	6148	17951	5677	-0.353090696	7.823572544	8.92808213	0.010198914	0.08396382
FBgn0070123	XR_group3a	1094465	1100391	+;+;+;+;+;+;+;+	4106	40452	30566	18410	31835	13001	17145	42715	27823	28506	16698	35974	16947	0.116204394	8.952411444	1.108304319	0.31109292	0.583263493
FBgn0070124	2	5423513	5433667	-;-;-	918	1083	751	206	471	126	1029	131	90	130	59	145	81	-2.536502567	2.875000658	21.97572089	0.000514548	0.013375522
FBgn0070125	2	27138621	27140631	+;+;+;+	1829	915	325	191	445	370	325	652	356	491	260	657	219	0.157189006	3.022750444	0.525493048	0.48099414	0.724036265
FBgn0070128	2	22754063	22773398	-;-;-;-;-;-;-	4507	31	23	1	44	15	11	35	58	32	21	46	29	1.050740547	-0.799377219	2.835990072	0.115346589	0.3432289
FBgn0070129	2	26381572	26383035	+;+;+	1338	905	706	464	903	270	297	1075	754	959	411	965	464	0.330005142	3.631729118	7.965764379	0.014067401	0.101677122
FBgn0070132	XR_group8	5174774	5176676	+;+;+;+;+	1452	2167	938	789	1688	544	684	1761	1108	1804	581	1702	737	0.125898322	4.44009022	0.678542261	0.424529687	0.680424082
FBgn0070133	3	4399617	4400965	-	1349	2484	1589	1620	2770	1012	1335	2151	1279	1805	868	2080	402	-0.460836803	4.900404778	6.917180572	0.02038567	0.126384271
FBgn0070134	3	4383855	4386267	-;-	2273	1027	608	421	979	234	293	932	637	811	340	839	223	0.068523474	3.427729906	0.167825266	0.688535048	0.850759287
FBgn0070135	3	1183362	1189627	+;+;+;+;+	1456	15132	10283	7179	14996	4869	4019	15323	13486	13433	6824	18312	10404	0.434466284	7.688381163	10.58797984	0.006074283	0.06190279
FBgn0070136	XR_group8	5180826	5185569	+;+;+;+;+;+;+	4039	5407	5588	3829	6695	2497	2400	6023	3762	5104	2361	5726	1852	-0.209882819	6.291660409	3.954780578	0.067589937	0.252593742
FBgn0070137	3	4364803	4370156	+;+;+	2249	248	36	136	152	4	37	630	371	366	281	581	204	2.075966432	2.183490893	15.35383789	0.001911957	0.030471142
FBgn0070138	3	5002059	5016418	+;+;+;+	2683	1195	729	526	1218	353	390	1215	862	980	554	1167	383	0.244033856	3.849243487	4.078406943	0.063930935	0.244646597
FBgn0070139	3	5016789	5021601	-;-;-;-	4621	3997	3306	1620	3840	1367	2217	4198	2444	3394	1588	3687	834	-0.08313027	5.624491281	0.254882436	0.621870714	0.817454147
FBgn0070140	3	5030777	5034431	-;-;-	1410	388	155	279	401	110	116	424	294	995	299	547	298	0.900352074	2.73363673	9.685297515	0.008008705	0.072742021
FBgn0070141	2	26657531	26659869	+;+;+;+;+;+;+;+	1894	28923	24504	14599	27323	11976	12701	27599	13406	15622	9559	26179	9537	-0.318555567	8.417270864	8.909833763	0.010259718	0.084330151
FBgn0070142	XR_group8	4056659	4057765	+;+;+	974	0	30	64	30	0	23	10	51	63	0	24	38	-1.043028797	-0.752110525	1.051445954	0.323401094	0.593353138
FBgn0070143	3	5049669	5115069	+;+;+;+;+;+;+;+;+;+	4118	1337	2152	611	1900	498	712	2296	1300	1920	1053	2465	1060	0.45683004	4.720153886	4.733656383	0.048052845	0.207304192
FBgn0070144	XR_group8	5213088	5218388	+;+;+;+;+;+;+	3028	4	10	4	12	2	5	10	7	12	2	19	27	0.465666118	-2.178274052	0.446717774	0.515263469	0.749645822
FBgn0070145	3	5101580	5106087	-;-;-;-	2528	1162	236	414	549	168	206	645	655	371	161	794	524	0.106280957	3.156329564	0.086681424	0.77310171	0.896166899
FBgn0070146	2	11655411	11665465	+;+;+;+;+	3380	19987	14313	10408	17447	6078	8871	19380	12311	13363	7311	18692	6622	-0.071049364	7.887223528	0.530753522	0.478848383	0.723263646
FBgn0070147	XR_group8	5230578	5246331	+;+;+;+;+;+	3243	275	149	148	201	85	60	116	156	190	40	155	151	-0.464628281	1.453125959	2.499403709	0.13723242	0.377865119
FBgn0070148	3	5126627	5132272	+;+;+;+;+;+;+;+;+;+	5092	1880	2166	1344	1930	1137	2498	4163	2825	4226	1780	4588	1572	0.586269604	5.591526461	4.150975714	0.063638287	0.243780783
FBgn0070149	4_group4	5981967	5986175	-;-;-;-;-	3978	1427	941	540	1748	699	364	1185	724	1227	519	957	235	-0.202247306	3.98245016	0.893320018	0.361335959	0.628614338
FBgn0070151	XR_group8	5340557	5342178	+;+;+	1487	512	244	192	805	215	185	370	243	308	309	464	71	-0.105338543	2.577803871	0.187676306	0.67176001	0.841637865
FBgn0070153	3	5133295	5136056	-;-;-;-;-;-;-;-;-	1397	5812	3845	2597	5866	1605	2562	5746	3229	5558	2240	5672	1816	0.064207766	6.126008916	0.258832536	0.619208811	0.816073207
FBgn0070154	XR_group8	5342725	5352134	+;+;+;+;+;+;+;+;+;+;+;+;+;+;+;+	8186	5323	5047	3114	6243	2477	2345	5604	2864	5011	2468	5137	1259	-0.217390431	6.159149541	2.465426531	0.139716287	0.381344193
FBgn0070155	3	5154643	5155245	+;+;+	469	6862	2982	3128	6209	2286	2203	7494	3042	5527	2667	7168	3015	0.260360308	6.313799524	3.076615499	0.102288152	0.320085162
FBgn0070157	4_group1	1675877	1682328	-;-;-;-;-;-;-;-;-;-;-	4934	4718	1344	683	385	684	129	1333	692	670	635	1113	502	-0.364992187	4.207623496	0.439558249	0.520470909	0.752987484
FBgn0070158	XR_group8	6337973	6339415	+;+;+	1320	1421	1670	1082	1530	704	661	650	503	504	337	688	587	-1.180976985	4.074099812	29.08291129	0.000110967	0.005206955
FBgn0070159	2	11520124	11527280	+;+;+;+;+;+;+	1889	12	2	0	133	0	0	4	32	5	6	6	4	-0.859225169	-1.692756876	0.371333887	0.552874353	0.773929244
FBgn0070160	4_group1	1661408	1674681	-;-;-;-;-;-;-;-;-;-	4505	1075	604	478	717	277	511	963	409	822	333	749	288	-0.124163082	3.474405688	0.449436579	0.514008459	0.748338842
FBgn0070161	3	15499591	15500786	-	1196	4778	5350	2559	4461	1657	2151	4963	2938	2783	1881	4686	1418	-0.251408654	5.916450898	3.024271375	0.104968633	0.325110567
FBgn0070164	3	1865624	1868082	-;-;-;-	2268	271	184	143	477	152	149	272	218	275	127	419	92	-0.030577794	2.082824308	0.016943851	0.898369792	0.954343276
FBgn0070165	3	5198294	5200170	-;-	1814	5161	4211	2391	2630	1917	1999	3950	1967	2063	1431	3954	1236	-0.437061361	5.678232389	6.287363439	0.025772458	0.145361019
FBgn0070166	XR_group3a	535080	539187	-;-;-	3961	4574	3328	2019	3844	1484	1862	3802	2252	2547	2366	3788	1241	-0.047417158	5.690170963	0.15501761	0.699988634	0.857306377
FBgn0070167	3	5212788	5255180	-;-;-;-;-;-;-	3127	1095	1283	1524	2372	1058	585	1937	1452	1149	751	2127	1167	-0.052694954	4.724727307	0.045241495	0.834840437	0.926990361
FBgn0070168	3	5302069	5302959	+;+	824	200	18	37	830	13	6	44	17	60	21	63	17	-1.926609755	0.709916105	3.984587129	0.068825876	0.255147941
FBgn0070172	3	5305825	5308758	-;-;-;-	2310	1319	1066	936	2468	1214	535	1695	769	1032	646	1368	556	-0.348627323	4.418505179	2.515057149	0.136106517	0.376197958
FBgn0070173	2	2873934	2894995	+;+;+;+;+;+;+;+	3683	24	4	12	43	14	2	22	8	20	14	16	5	-0.025405947	-1.67924882	0.001863188	0.966207826	0.985345368
FBgn0070174	3	5310985	5311805	-;-;-	701	1525	728	515	949	277	395	860	517	806	317	728	259	-0.327333272	3.542036734	3.66377177	0.077240638	0.273423296
FBgn0070176	3	5315571	5321868	-;-;-;-;-	2551	4256	2662	2795	4453	1844	1721	4241	2408	3721	2047	4055	1276	-0.069317702	5.778276667	0.311520346	0.585967716	0.795241901
FBgn0070177	2	3008596	3009716	+;+;+;+	930	14513	12878	8391	15660	5801	6679	21336	11494	11220	7091	20090	8298	0.222953201	7.77934609	3.575752525	0.080479776	0.279104245
FBgn0070178	4_group5	439563	441264	-;-	1639	16730	16061	9600	16305	6037	3556	18624	10950	13150	7706	17946	6462	0.096437566	7.745001814	0.394339029	0.540598247	0.76693959
FBgn0070179	3	4879818	4882098	+;+;+	1547	5203	3954	3146	4563	1719	2010	5361	3189	4255	1844	5727	1939	-0.028201223	6.022490623	0.101887024	0.754505652	0.887792381
FBgn0070180	XR_group3a	270171	273337	-;-;-;-;-	1394	1526	588	514	774	375	424	1272	940	1235	484	1293	820	0.496667902	3.986552526	5.886269217	0.030075084	0.160040855
FBgn0070183	2	2871444	2873588	-;-;-	1767	19520	22900	12669	18615	7907	10202	14012	8657	9318	6442	16860	5921	-0.693525499	7.907813429	22.81010306	0.000334596	0.010433557
FBgn0070184	4_group1	1669045	1673870	+;+;+;+	899	1773	382	403	555	170	182	502	386	754	107	654	243	-0.497960808	3.091963831	1.602796768	0.22808129	0.495972189
FBgn0070185	4_group1	1674877	1675950	+;+;+	943	1462	881	462	1153	387	471	1367	856	1368	377	1259	430	0.151413108	3.946013339	0.831773628	0.377900035	0.644711535
FBgn0070186	2	2851246	2852946	-;-	1643	0	10	9	8	3	4	26	10	37	0	42	13	1.069897209	-1.874505504	1.673583595	0.217666989	0.484301631
FBgn0070187	XR_group6	5129022	5130722	+;+;+	1571	990	1414	931	1448	496	294	2512	1600	2272	971	2411	864	0.809701073	4.601367286	20.5583557	0.000522667	0.013514798
FBgn0070189	XR_group6	5648303	5650205	-;-	1844	1086	735	697	1301	556	478	831	616	880	298	879	415	-0.463960449	3.778337921	9.572666398	0.008297034	0.074576832
FBgn0070191	2	2839374	2848662	-;-;-;-;-;-;-;-;-	3369	30	23	47	42	32	12	54	53	78	32	51	21	0.415379057	-0.330772213	0.942702345	0.348809914	0.616779581
FBgn0070192	4_group3	3646067	3648078	+;+;+	1508	635	497	322	747	169	304	914	804	513	299	1025	663	0.560466613	3.425669595	5.814359015	0.030932885	0.162893969
FBgn0070193	2	2837167	2838580	-	1414	4826	7525	4776	8708	2951	2385	7267	4141	4640	2871	7329	2380	-0.241194421	6.516392149	2.166257035	0.164197246	0.416289479
FBgn0070194	4_group3	3669248	3678364	+;+;+;+;+	1860	2365	1343	1698	1726	798	1564	2518	1714	1980	771	2522	820	-0.125373095	4.959110881	0.347966187	0.565096244	0.78253522
FBgn0070195	XR_group3a	244899	250857	-;-;-;-;-;-;-;-;-;-	4223	18	37	1	10	4	5	14	10	9	2	7	7	-0.749613351	-2.167638554	1.129233452	0.306743386	0.579662906
FBgn0070197	2	2922621	2925708	-;-;-;-;-;-	1342	224	36	91	186	54	27	95	83	83	18	157	55	-0.523144388	0.707637501	1.398532187	0.257559257	0.530781286
FBgn0070198	2	26201397	26208327	+;+;+;+;+;+;+;+;+;+	5636	1168	855	759	376	475	254	1839	1515	778	548	1129	493	0.54756159	3.980298899	2.953378163	0.110075426	0.33488161
FBgn0070199	4_group1	1682767	1690015	+;+;+;+;+;+;+;+;+;+;+;+;+;+;+;+;+	5761	39	67	44	108	77	10	74	49	47	48	48	27	-0.207381407	0.111474788	0.195855893	0.665157022	0.838433493
FBgn0070200	4_group4	5976518	5981979	+;+;+	4945	1811	1019	852	1642	536	646	1724	1068	1351	726	1999	421	0.107663037	4.362008336	0.636223891	0.439008918	0.693551146
FBgn0070201	4_group4	5995473	5996758	+	1286	926	941	585	1433	400	402	1773	993	1465	634	1397	413	0.435088799	4.079129375	7.676821611	0.01554629	0.107246766
FBgn0070203	XR_group6	5650144	5652442	-;-	2241	3227	3273	2173	4632	2130	1660	3144	2118	2928	1131	3274	1010	-0.483128302	5.573534307	11.7438175	0.004335787	0.051369915
FBgn0070205	4_group4	5998001	5999371	+;+;+;+	1181	275	95	116	110	55	53	104	90	107	55	118	40	-0.457731852	0.908916545	2.508259965	0.136594006	0.376955311
FBgn0070208	2	12851641	12858738	-;-;-;-;-;-;-;-;-	6557	5776	4825	2974	5208	3253	2823	4869	3337	4145	2233	5509	1399	-0.308780307	6.186453321	5.45786775	0.035634869	0.176277805
FBgn0070209	3	4921075	4922437	+;+;+;+	795	0	7	1	21	6	0	15	8	28	9	17	13	1.374678055	-2.132452369	2.238712055	0.157805286	0.407971526
FBgn0070210	3	4931209	4933371	-;-	2098	25426	16429	10734	19971	7545	8706	17235	10768	11458	8616	20666	7020	-0.221872988	7.976825379	4.310013588	0.05769196	0.231192854
FBgn0070212	3	4947533	4948859	+;+	1111	6	7	4	10	0	12	4	23	31	0	11	12	-0.096116805	-2.143949498	0.00929688	0.92461607	0.967554898
FBgn0070214	3	4962393	4965027	-;-;-;-;-;-;-	2072	1356	1226	1428	1620	327	214	868	735	838	114	735	790	-0.949452809	3.964331649	15.12604679	0.001771242	0.029494588
FBgn0070215	2	12850101	12851306	-;-	1136	650	289	275	65	102	135	393	406	419	135	706	214	0.343731947	2.504886637	0.718358518	0.411990815	0.671770951
FBgn0070216	3	4965363	4968121	-;-;-	2390	5354	3624	2650	4626	1780	2444	5876	3015	3062	2410	5700	2192	0.085067671	6.047925326	0.438620609	0.51903455	0.752564516
FBgn0070217	2	20169165	20194696	+;+;+;+;+;+;+;+;+;+;+	3142	2208	1459	1108	3195	1024	638	2702	2681	3076	980	3778	2352	0.557310352	5.275429998	6.70422201	0.022044726	0.132638625
FBgn0070218	2	12845852	12849761	-;-;-	3795	3658	4460	1738	4608	1886	2123	4476	2893	3184	1652	4179	1103	-0.167270221	5.782443432	1.099534556	0.312941218	0.585271188
FBgn0070219	4_group3	3683839	3700348	+;+;+;+;+;+;+;+;+	5285	290	170	175	114	60	77	191	152	169	71	326	119	-0.005895989	1.557424905	0.000499216	0.982504015	0.992505432
FBgn0070220	3	4968208	4972371	-;-;-;-;-;-;-	3777	3953	2477	1779	4393	1083	1015	2874	2022	3090	1542	3209	871	-0.077973081	5.386845037	0.251832344	0.623944082	0.818154552
FBgn0070221	2	12843773	12844624	-	852	1383	914	807	1154	404	440	1091	635	966	472	965	320	-0.261341269	3.859704724	3.703579205	0.07582727	0.27011281
FBgn0070222	3	2752734	2753695	+;+	886	956	771	599	469	364	140	700	464	505	237	528	145	-0.488383365	3.159303657	3.150234806	0.0986576	0.313768769
FBgn0070224	2	12837286	12838428	-;-;-;-	913	7460	6492	5342	6942	2942	2635	8218	4284	5442	2690	8036	2541	-0.182618042	6.579388411	2.728632556	0.121827151	0.353607893
FBgn0070225	3	15136345	15138475	-;-;-;-;-	1908	756	463	402	747	234	294	626	450	751	320	792	318	0.107051429	3.239925784	0.573462844	0.462014909	0.711061883
FBgn0070226	2	12832803	12836094	-;-;-;-;-;-;-	2901	7617	5080	4244	7105	2634	2851	7272	4967	6767	2715	7306	2586	-0.012504218	6.535767233	0.022540989	0.882896617	0.948455624
FBgn0070228	4_group4	6042275	6048309	+;+;+;+;+;+	5081	12381	9705	5978	13274	5329	4385	11306	8153	10522	5106	12065	3269	-0.06627246	7.263834775	0.381953414	0.546936153	0.770314314
FBgn0070229	2	12828053	12830400	-;-	2201	9806	6602	5326	11218	3743	4386	11889	6893	9977	4613	10916	3610	0.153787425	7.076383997	2.686087311	0.124518631	0.35781748
FBgn0070232	2	21748843	21753442	+;+;+;+;+;+;+	2792	2752	1875	1452	2804	810	884	2658	1622	2257	995	2721	868	0.001495205	5.014872089	0.000224053	0.988278297	0.994736876
FBgn0070233	2	3058784	3060251	-;-;-;-	1298	7584	6222	4824	8859	2905	3167	6024	3842	5221	2393	6547	2121	-0.468252419	6.50788903	30.56017185	8.77E-05	0.004520144
FBgn0070236	2	21743937	21744807	+;+;+	742	1410	32	13	4	9	8	31	33	22	24	37	25	-1.561986003	0.953014369	0.919980639	0.357265224	0.624927607
FBgn0070237	4_group4	6054830	6056661	+;+;+;+;+	1584	1826	1867	1191	2688	855	629	2373	1256	1807	727	1979	656	-0.147234143	4.733631754	1.077442195	0.317666436	0.588789368
FBgn0070238	XR_group3a	214361	228734	-;-;-;-;-;-;-;-;-;-;-;-;-	11860	1508	1221	709	1265	590	397	746	727	879	319	954	260	-0.666506873	3.857279387	16.17759784	0.001372866	0.025023989
FBgn0070239	4_group4	6057312	6063956	+;+;+;+;+;+;+;+;+	1932	1255	1177	565	1646	597	431	1221	878	1139	509	1178	483	-0.092528775	4.074193984	0.407530249	0.534000793	0.762801639
FBgn0070240	2	18027891	18029566	+;+;+;+;+	1361	1884	1654	943	2936	1007	602	3174	1481	2764	1081	2879	1094	0.420746559	5.000802782	6.10016534	0.027683886	0.152339166
FBgn0070241	2	20203680	20206123	+;+	2389	46813	9180	15194	18784	5677	5464	17330	14874	20956	2536	24102	8216	-0.454278245	8.052271797	1.331410466	0.272034262	0.544996208
FBgn0070242	3	13265435	13267309	+;+	1811	18	10	11	41	6	11	15	77	20	0	22	18	-0.126471653	-1.248162432	0.020590882	0.888037775	0.950567689
FBgn0070248	3	13275853	13277662	-;-	1747	1244	513	2099	1215	174	18	685	1001	1452	100	1010	1464	-0.42952779	4.127908366	0.604716299	0.452527981	0.702714998
FBgn0070249	3	13277916	13279588	-;-	1610	83	88	619	1361	40	62	101	115	161	29	130	171	-1.876055574	2.133174812	8.108777346	0.014821815	0.104107123
FBgn0070251	2	3038252	3044434	-;-;-;-;-	1396	275	246	441	290	87	248	117	55	78	48	87	67	-2.007368844	1.80337902	32.77764091	6.26E-05	0.003547199
FBgn0070252	2	3024844	3030743	-;-;-;-;-;-;-;-	2986	408	463	351	310	299	224	1057	724	667	422	1087	504	0.917705111	3.376819825	16.33130997	0.001323767	0.024455552
FBgn0070256	3	13315399	13319948	+;+;+;+;+;+	4187	1543	1320	873	1749	661	727	1591	924	1465	699	1645	412	-0.117917304	4.37586968	0.823097391	0.380326093	0.646704558
FBgn0070257	3	13321865	13323334	+;+;+;+	1142	71	33	19	17	0	2	68	29	17	10	52	9	0.396465314	-1.05546441	0.289608831	0.599309927	0.804870602
FBgn0070258	XL_group1a	6315429	6325341	-;-;-;-;-;-;-;-;-;-;-	7267	1629	1087	897	1793	420	460	1453	1179	1473	534	1659	739	0.072108606	4.314715149	0.354875048	0.561308789	0.779752848
FBgn0070260	4_group1	987966	988913	-;-	889	1129	719	510	869	349	501	1605	891	1009	395	1276	503	0.349105813	3.880211379	5.343969584	0.037311143	0.180337867
FBgn0070261	4_group1	989245	990769	+;+;+	1403	2117	1815	1293	2112	812	1005	1878	1212	1364	818	1767	526	-0.359686038	4.693546611	9.393604684	0.008780603	0.076762332
FBgn0070262	2	26226050	26226996	-;-;-	815	8	4	2	14	4	4	32	28	23	19	16	12	2.094636508	-1.752596562	16.15668938	0.001379706	0.025085213
FBgn0070263	3	8783306	8784707	-;-	1346	120	275	161	261	98	96	387	203	236	118	269	53	0.113404844	1.796743742	0.145944617	0.708440344	0.863417723
FBgn0070264	2	20107918	20109818	-;-;-;-	1700	7727	6213	4366	8613	3090	3107	11731	7904	7647	6495	12275	6386	0.691369854	7.074480893	24.57263093	0.000240744	0.008618411
FBgn0070265	4_group1	991670	992736	+;+;+	944	1889	1852	1123	514	587	2340	1638	1031	1142	669	1504	822	-0.507243656	4.704491801	1.167307435	0.302152231	0.574784374
FBgn0070266	XR_group3a	197660	200504	-	2845	1068	734	507	1015	322	416	957	756	885	383	1395	352	0.102777727	3.715508558	0.575271253	0.461324259	0.710738423
FBgn0070267	XR_group6	9511881	9514414	+	2534	5667	5972	3745	6750	3022	2712	7075	4320	4670	2323	6392	2151	-0.189160777	6.397109327	2.857464684	0.114101448	0.340819193
FBgn0070268	2	20119040	20130404	-;-;-;-;-;-;-;-	7820	3636	2967	1657	4670	1478	990	4166	2937	3446	1713	4372	1417	0.218502046	5.636937798	2.623116471	0.128637994	0.364308952
FBgn0070269	XR_group6	9519475	9522739	-;-;-;-	2934	7891	5843	3876	6375	2627	3107	5082	3199	3915	1802	3973	1577	-0.682047461	6.245516695	47.53801954	9.40E-06	0.001078007
FBgn0070270	4_group3	3648563	3666775	-;-;-;-;-;-;-;-;-;-;-;-	8633	517	651	257	244	146	163	544	497	625	192	529	223	0.219232922	2.801793016	0.802081	0.386301093	0.651980762
FBgn0070271	2	20196081	20199208	-;-;-;-;-;-;-	2686	8393	6984	3867	8252	3175	3280	11214	7870	8183	4342	12258	5439	0.475446831	6.993873672	21.22330797	0.000456713	0.012398778
FBgn0070272	2	26252223	26255144	-;-;-;-;-	2537	34	67	190	86	17	23	102	120	137	38	161	164	0.535080295	0.945471737	2.392102897	0.145269584	0.389987685
FBgn0070273	2	15958960	15966547	+;+;+;+;+;+;+;+	3715	36219	27165	17129	32143	10916	12371	33397	21059	24962	12769	34404	12038	-0.031242581	8.691915624	0.156020817	0.699071955	0.856676663
FBgn0070277	4_group3	3631733	3644303	-;-;-;-;-;-;-;-;-	3473	662	98	290	378	70	118	441	351	404	131	553	247	0.309665762	2.462282153	0.79328981	0.388842736	0.654273125
FBgn0070279	2	20209143	20211105	-	1963	1867	1465	1231	2399	673	925	1925	1259	1672	1013	2280	861	0.028991892	4.764517451	0.051170843	0.82445744	0.921678313
FBgn0070280	2	15886609	15898476	+;+;+;+;+;+	1815	290	60	165	167	137	29	184	148	157	50	182	58	-0.29358917	1.327817552	0.50477274	0.489610184	0.730897648
FBgn0070281	XR_group6	9524492	9527295	+;+;+;+;+;+;+	2365	6649	5315	3294	6587	1801	2510	7537	4734	5253	3155	7616	2507	0.203436262	6.420053786	3.671745181	0.076955024	0.272806769
FBgn0070282	2	16412719	16459337	-;-;-;-;-;-;-;-;-;-	4388	3344	2062	1582	2400	803	831	2221	2176	2183	877	2727	1722	0.014428793	5.137538945	0.009141516	0.925246533	0.967815386
FBgn0070283	2	20220017	20228194	-;-;-;-;-;-;-;-;-;-;-	3549	2952	2815	1487	4212	1250	1563	3629	3300	3070	1684	5103	1813	0.316194318	5.65184016	4.655242791	0.049683485	0.211140434
FBgn0070284	2	20229072	20230411	+;+	1277	52	72	136	66	56	56	228	166	258	115	234	62	0.930889853	1.265620118	6.193710555	0.026708684	0.148474807
FBgn0070287	2	3037068	3038374	+;+;+	1178	10	44	8	21	2	13	8	60	9	2	38	51	-0.214879761	-1.064198333	0.075949653	0.787073701	0.903458496
FBgn0070288	2	3034893	3036786	+;+;+	1769	273	324	165	402	106	108	271	158	214	52	223	46	-0.718091731	1.786554833	7.582161129	0.016069662	0.109723445
FBgn0070289	4_group3	4322598	4327418	+;+;+;+;+	4432	4525	4967	2787	5102	2008	1869	5818	3718	5469	2402	6201	1592	0.123377122	6.128837916	0.902141726	0.359050336	0.626951186
FBgn0070290	2	15789713	15792769	+;+;+;+;+	1942	17	23	7	2	1	5	45	26	27	22	37	11	1.573889065	-1.423036077	6.644216333	0.022540372	0.134354889
FBgn0070291	4_group3	4333435	4334179	+;+	673	28723	18848	17678	31047	9133	9343	22411	15632	21820	7700	25345	10338	-0.287784293	8.358716798	10.86763142	0.00558914	0.059247084
FBgn0070293	3	2954347	2955680	-;-;-	1211	18084	17904	7864	11699	6534	7907	20645	11230	11115	6577	18845	7908	0.018617955	7.818069298	0.012224157	0.913604255	0.962009298
FBgn0070295	2	22455479	22459083	-;-;-;-;-	3367	880	455	349	672	280	283	792	522	806	257	858	169	0.116139199	3.222660633	0.38419479	0.545778624	0.770160949
FBgn0070296	2	22443563	22450026	+;+;+;+	1021	592	412	476	843	230	164	506	618	701	173	590	426	-0.072424234	3.144199043	0.13448142	0.719564389	0.868955943
FBgn0070297	3	9120573	9123137	-;-;-;-;-	2195	2291	1395	1175	2052	989	852	1858	1139	1566	727	1782	638	-0.260702795	4.668821676	6.293541716	0.02571206	0.14513183
FBgn0070298	2	22429426	22431752	+;+;+;+	2139	141182	100399	58849	99462	45240	57487	151863	91862	89181	58268	160722	71417	0.260627209	10.76568168	3.284807889	0.0924167	0.302097501
FBgn0070299	3	2972318	2973684	-;-	1174	326	354	253	444	192	148	457	291	461	170	447	144	0.032760584	2.501316938	0.035543016	0.853291883	0.935714088
FBgn0070300	3	2988342	2989069	-;-;-;-;-	556	4112	2808	2085	3327	1499	1551	4293	2358	3454	1441	3988	1504	0.035613351	5.626146927	0.149304114	0.705276301	0.861189976
FBgn0070301	3	3011567	3015190	-;-	3560	1439	877	860	1738	631	472	1727	1194	1426	626	1639	628	0.18708818	4.32929786	2.078698543	0.172363113	0.425891157
FBgn0070302	2	17461169	17463165	-;-;-	1875	1439	832	695	1290	492	500	1056	859	1073	482	1218	505	-0.070688148	4.005096305	0.377176511	0.54941906	0.77166661
FBgn0070304	2	17459929	17461154	+;+;+	1035	10514	8513	5639	12656	4423	4391	10472	6181	8911	4700	10331	3000	-0.125513928	7.0923443	1.696779171	0.214685206	0.480652685
FBgn0070305	Unknown_group_152	8835	12174	-;-;-;-;-;-;-;-	2653	8656	7846	4691	9580	3747	3612	10028	5964	7097	3896	9759	3951	0.026462429	6.918954739	0.090789949	0.767807197	0.893532163
FBgn0070306	4_group3	3813408	3816173	+;+	2709	2868	1613	1331	2690	682	726	2028	1438	2460	1057	2502	644	0.020156927	4.884783308	0.015397729	0.903090801	0.957183705
FBgn0070308	XR_group6	2608304	2609591	-	1288	598	460	306	474	246	301	669	377	651	213	509	257	0.020668876	2.982417275	0.01383759	0.908105838	0.959422743
FBgn0070309	4_group3	8007133	8008321	+	1189	396	287	197	519	127	140	309	253	368	156	360	94	-0.135424024	2.264411096	0.474287695	0.50278883	0.741411601
FBgn0070310	4_group1	1650940	1652470	+;+;+	1405	295	232	73	307	115	65	176	275	238	68	287	133	0.006466317	1.776742734	0.000394409	0.984448392	0.993250647
FBgn0070311	4_group3	8012861	8015380	+;+;+;+	2325	2703	1443	1348	2303	684	846	2547	1614	2348	996	2935	891	0.201724927	4.94202941	2.948529357	0.109000525	0.333033226
FBgn0070312	3	7659912	7661892	-;-	1869	50	1420	100	30	13	33	74	70	107	40	74	47	-1.713886622	1.628145146	3.297311344	0.095605397	0.307591777
FBgn0070315	4_group3	8015540	8017599	+;+	2003	2604	5088	1772	3390	1657	1686	5563	3055	3569	1918	4747	1725	0.198302123	5.823244284	0.983663142	0.338994871	0.608285603
FBgn0070316	2	5302519	5303835	-;-;-;-	635	40	70	38	3	17	28	0	15	67	1	8	33	-2.170960397	-0.789621972	3.617921031	0.078907993	0.276394393
FBgn0070317	4_group3	8019797	8020827	+;+;+	907	7686	7717	3570	7487	3183	2690	7666	4147	5363	2457	7361	3296	-0.186900385	6.575067788	2.217675276	0.159628444	0.410347425
FBgn0070318	3	8917102	8918357	-;-	1189	57	65	81	68	35	29	98	57	74	36	145	29	0.088266649	0.282694166	0.077199619	0.785376074	0.902297102
FBgn0070319	2	5308063	5315240	+;+;+;+;+;+;+	2591	24	90	11	16	17	19	5	2	88	22	40	60	0.049721699	-0.516933373	0.003394874	0.954398348	0.979315375
FBgn0070320	4_group3	10223574	10225907	+;+;+;+	2165	2291	2141	1304	2701	1248	1052	1948	1116	1774	689	1963	425	-0.58169696	4.835871604	13.92139712	0.00240233	0.035521907
FBgn0070321	XL_group1e	3872243	3875279	-;-;-	2886	1793	1037	1199	2155	651	999	1567	1494	1766	770	2049	847	-0.002229865	4.672676161	0.000181441	0.989451616	0.995279494
FBgn0070322	4_group3	4694152	4711407	-;-	2823	6	13	15	15	6	7	13	8	13	0	30	5	-0.58863223	-2.100442018	0.765445909	0.397063384	0.660737585
FBgn0070325	XL_group1e	4530027	4539807	+;+;+;+;+;+;+;+;+;+;+	4627	2910	2311	1476	3257	1295	1248	2848	2063	2540	912	2832	1083	-0.15234666	5.240203167	1.946244308	0.185719455	0.442375573
FBgn0070326	4_group5	402858	406704	+	3847	3095	1983	1742	3331	983	906	2441	1807	2385	1113	2714	1048	-0.10744797	5.152399914	1.006258857	0.333598425	0.602526958
FBgn0070329	4_group1	1652569	1655155	-;-;-	2222	32903	17067	15637	30171	8932	9319	28374	20339	23497	8855	32149	13989	0.056474979	8.494133224	0.234074025	0.636341723	0.824448737
FBgn0070330	XR_group8	4306531	4308552	+;+;+;+	1628	179	48	35	91	64	36	149	103	98	65	191	103	0.812665003	0.876526121	4.78800031	0.046959884	0.205145692
FBgn0070331	XL_group1e	10043459	10047847	+;+;+;+;+;+;+	3994	46	16	27	23	30	28	20	25	24	28	31	4	-0.359970019	-0.879633887	0.545349464	0.472979868	0.718297521
FBgn0070332	4_group1	1642865	1650805	-;-;-;-;-;-;-;-	4764	3369	1211	996	1841	1247	592	2330	2610	2321	945	3207	1975	0.504258643	5.139450134	3.059245966	0.104501106	0.324310819
FBgn0070333	4_group5	1143798	1145241	-;-	1384	1723	1371	1012	2058	686	902	1468	903	1341	649	1709	361	-0.373900166	4.43661711	6.406732754	0.024634323	0.141495619
FBgn0070334	2	3050160	3058783	+;+;+;+;+;+	1833	48313	41531	23325	41950	14800	18453	52410	31632	31060	21887	61542	26708	0.211723853	9.310232048	2.216937519	0.159692861	0.410347425
FBgn0070335	4_group5	1665557	1667623	+;+;+	1937	746	586	542	608	289	485	613	634	598	400	733	262	-0.109402304	3.395416573	0.278486751	0.606336158	0.808425189
FBgn0070336	2	12805128	12828472	+;+;+;+;+;+	4427	4051	2734	1807	4026	1512	1609	3325	2743	2748	1243	4032	1304	-0.118331636	5.563169941	1.200328116	0.292585866	0.565258018
FBgn0070337	4_group3	10225774	10228151	-;-;-;-;-	1978	221	274	99	306	49	6	166	176	214	25	201	199	-0.302827052	1.526443817	0.373601263	0.551316597	0.772779811
FBgn0070338	2	12831156	12832783	+;+;+	1505	25324	19746	13103	22625	8825	10664	13765	9118	11950	5452	14794	5290	-0.832801875	7.954319693	109.804703	7.99E-08	3.78E-05
FBgn0070339	2	12836149	12837428	+;+;+;+	914	979	451	518	1206	364	412	585	532	637	359	765	308	-0.286901734	3.469608379	2.543905715	0.134061335	0.373231928
FBgn0070340	4_group3	10220412	10222830	-;-;-;-	2189	40343	33261	21663	33591	14701	17225	41444	24654	26466	15685	42438	15551	-0.048638839	8.975658446	0.230939595	0.638590523	0.825996989
FBgn0070342	2	12841739	12843865	+;+;+;+;+;+;+	1502	924	337	278	781	145	192	376	500	552	49	455	305	-0.597607719	2.835427254	2.521730845	0.135763681	0.375895955
FBgn0070343	2	12844665	12845930	+;+;+	1069	2775	2488	1503	2972	1185	1287	2924	1696	2665	1090	2792	1001	-0.113766589	5.221982406	1.238741153	0.285310786	0.558248796
FBgn0070344	4_group3	8017875	8019708	-	1834	482	312	416	503	216	206	532	448	527	224	567	252	0.086581699	2.879327717	0.271695341	0.610716276	0.811485514
FBgn0070345	4_group5	417085	422317	+;+;+	3314	52838	30237	27025	45922	15574	14542	43717	30819	39613	17925	48068	22764	0.069112918	9.207603467	0.462401809	0.508099295	0.744961791
FBgn0070346	2	12860439	12881936	+;+;+;+;+;+;+;+;+;+;+;+;+;+;+;+	7440	2746	3941	1644	3386	1082	818	3740	3375	3524	1324	4056	2043	0.282269113	5.580672204	3.153575825	0.098496583	0.313528242
FBgn0070347	3	14868480	14870883	-;-;-;-;-	1679	30	10	20	120	122	109	133	46	31	26	84	28	0.015762532	0.450251815	0.000558286	0.981498046	0.992239937
FBgn0070348	4_group3	8008119	8012645	-;-;-;-	2965	9810	9211	6456	12616	4218	6521	11703	7017	7255	4556	11486	4443	-0.17158265	7.21897916	1.598212248	0.227737051	0.495742414
FBgn0070351	4_group3	7995915	7998389	-;-	2412	473	346	218	667	145	231	603	334	477	229	505	164	0.146363609	2.720662675	0.696090376	0.418748061	0.676694253
FBgn0070353	4_group3	2338547	2343079	+;+;+;+	4357	134	129	61	141	19	34	232	123	101	68	223	116	0.73027582	1.058216573	5.440205217	0.03588891	0.176836781
FBgn0070354	4_group3	3803161	3803963	-	803	2	24	4	18	32	1	2	12	3	0	4	2	-2.121137305	-2.229180731	3.212391203	0.095713561	0.307804919
FBgn0070355	3	14876	15985	+;+	1053	1009	796	330	1123	421	435	911	638	870	438	1106	499	0.135896988	3.729139613	0.630799111	0.440922538	0.695055202
FBgn0070356	4_group5	456481	457653	+;+	1113	186	198	113	238	85	92	393	223	310	103	367	85	0.512705255	1.827564571	5.863321999	0.030345745	0.161127854
FBgn0070357	2	21499405	21500329	+;+	846	33	11	0	20	2	4	26	0	26	4	8	2	0.248511776	-2.164232093	0.066888526	0.799858238	0.909532204
FBgn0070358	2	22352521	22353057	+;+	475	2793	1214	536	3539	876	1050	2975	1507	2756	811	2789	918	0.324280156	4.980660788	1.484791504	0.244734862	0.514709202
FBgn0070359	2	26224834	26226013	+;+;+;+	989	50551	34736	25307	42778	14661	15878	41512	46404	39332	17642	63269	31245	0.254473285	9.34420276	3.472599461	0.084486357	0.287633547
FBgn0070360	4_group3	3808069	3813045	-;-;-;-;-;-;-	3474	3100	2084	1275	3116	925	1136	2999	2657	2502	1098	3034	1481	0.197146811	5.271238434	2.366847429	0.147245728	0.392509421
FBgn0070361	4_group3	3816174	3819024	-;-;-;-;-	2590	917	533	414	895	260	327	797	520	1056	408	840	273	0.197884649	3.447793982	1.392732759	0.258501116	0.531412076
FBgn0070362	XR_group6	10033323	10035171	-;-;-	1723	1432	1656	838	1332	772	853	2931	1887	2034	1022	2818	693	0.558225009	4.798266694	10.78087786	0.005734671	0.060032152
FBgn0070363	XR_group6	3107367	3108157	+;+;+	641	2529	1189	1267	2126	757	574	1628	1038	1525	894	1698	879	-0.098302846	4.630700595	0.364631637	0.55604544	0.775927732
FBgn0070364	XR_group8	7153056	7154001	+;+	890	852	1266	393	1111	614	296	1647	803	1016	479	1323	494	0.249817969	3.961935821	1.19021491	0.294543701	0.567265058
FBgn0070365	2	29359634	29364188	+;+;+;+	2284	7216	5795	3182	5499	2186	2705	7369	3880	4795	2665	6334	2202	-0.020759533	6.349357026	0.038762823	0.846878573	0.932005681
FBgn0070366	2	29364250	29371377	+;+;+;+;+	2831	2499	2224	1559	2760	1072	1331	1722	1141	1148	673	1493	719	-0.813374098	4.858698806	43.83004186	1.44E-05	0.001376628
FBgn0070367	2	29345477	29347386	+;+;+	1776	255	132	144	317	59	82	186	141	190	116	155	28	-0.226518758	1.447622816	0.537790887	0.476003441	0.721088252
FBgn0070368	Unknown_group_95	6905	7265	-	361	2502	998	991	1484	619	544	1265	975	1466	468	1223	700	-0.286337365	4.326550912	2.560934162	0.132871961	0.371217517
FBgn0070369	2	20588779	20590744	+;+;+	1835	1772	1083	971	2044	742	497	2988	1714	2840	1111	2569	852	0.703268499	4.834406833	23.04412623	0.000319979	0.010219532
FBgn0070370	XR_group6	2617256	2621714	+;+;+;+;+	3751	1039	946	850	1336	420	400	1172	479	856	343	1051	292	-0.419714117	3.783881292	6.857184525	0.020837835	0.128147498
FBgn0070371	4_group3	7991523	7993996	-;-;-;-	1859	3660	2648	2413	3761	1322	1647	3097	1814	2531	1411	2726	956	-0.373313667	5.439322642	10.49517209	0.006245949	0.062714604
FBgn0070372	4_group3	7963287	7966495	-;-	3155	2788	1475	1340	2668	860	977	2466	2025	2050	945	3212	1959	0.233275368	5.1445449	1.695069155	0.214903206	0.480920827
FBgn0070373	3	15779760	15780645	-;-;-	738	873	403	383	413	228	278	274	685	507	85	594	405	-0.470209925	3.019607004	1.723085475	0.211493028	0.476483833
FBgn0070374	2	24239724	24241551	+;+;+	1710	3822	1815	2349	2827	778	1177	2747	1840	2098	1301	3036	1104	-0.120863457	5.244877847	0.527791113	0.480054722	0.723773164
FBgn0070375	XR_group6	3169548	3170315	+;+;+;+;+	512	35	10	10	12	6	15	4	15	10	2	6	6	-1.201208633	-2.044718185	2.887881003	0.112365868	0.33824913
FBgn0070377	3	15734301	15750404	-;-;-;-;-;-	2554	46	4	11	9	3	6	121	61	124	20	94	37	2.477154749	-0.331762677	18.56744537	0.000796508	0.017724711
FBgn0070379	2	17051080	17055734	+;+;+;+;+;+	4350	3771	2365	1756	2945	1052	1082	1940	1436	1861	1067	1889	526	-0.565780979	5.040792933	15.65891564	0.001554761	0.026931317
FBgn0070380	4_group3	658787	678434	-;-;-;-;-	2556	191	265	166	460	247	201	465	270	464	268	417	120	0.333380727	2.509910946	1.553127646	0.234053827	0.502200434
FBgn0070381	4_group5	67664	68774	+;+;+	983	1366	996	738	1252	451	399	1265	639	1064	376	1064	247	-0.287278499	3.863847518	3.01448959	0.105478989	0.326002834
FBgn0070382	4_group3	645800	647387	-;-	1529	6037	2644	2417	4573	1409	1184	4067	2843	4450	1154	4422	1637	-0.084500904	5.745374268	0.264176626	0.615648374	0.814559272
FBgn0070385	3	2787150	2787607	+;+	394	3955	2721	2160	4991	1400	1241	3829	3173	3594	1097	4712	2401	0.023481448	5.730888978	0.02753652	0.870684467	0.942701273
FBgn0070386	4_group5	64003	67221	-;-;-;-;-;-;-	2715	1299	1378	539	1342	280	338	1161	936	1237	460	1589	571	0.126773023	4.027457633	0.500031782	0.491619478	0.732636726
FBgn0070387	4_group5	86613	88761	+;+;+;+	1967	1293	844	842	1267	398	481	1164	879	1243	501	1435	393	-0.000832749	4.01778768	3.76E-05	0.995196705	0.997914522
FBgn0070388	3	23429	69906	-;-;-;-	2000	5559	4615	2938	5703	2092	2115	5420	3566	4134	2123	5465	1956	-0.094617804	6.119600652	1.471644379	0.246069709	0.51606823
FBgn0070389	4_group5	130288	130848	+	561	1178	440	350	619	176	248	598	410	593	209	525	231	-0.20769448	3.036986683	0.968031824	0.342629711	0.612264578
FBgn0070390	XR_group6	9607080	9608431	+	1352	1884	1228	1537	1668	694	662	2816	1668	3293	1082	2457	1433	0.566850587	4.981636214	13.08867503	0.002991751	0.040874281
FBgn0070391	XR_group6	9608382	9609492	+;+	1051	202	185	328	357	96	68	432	478	684	203	815	379	1.010657839	2.704520107	22.0976025	0.000384064	0.011169804
FBgn0070392	4_group1	757096	757865	-;-;-	652	8176	6092	3692	7804	3082	3130	8769	5053	7482	2831	8458	3126	0.060120429	6.673921623	0.462567671	0.508024496	0.744961791
FBgn0070393	XR_group6	9637880	9639001	+;+;+	997	44	769	1514	26	10	37	46	1560	2448	12	601	849	0.173135641	3.692561788	0.081633297	0.780190854	0.899706585
FBgn0070394	4_group3	640556	643695	-;-;-;-;-	2895	6324	3582	3036	6275	2076	1661	5476	3604	5285	2183	5982	1704	0.025344897	6.127924922	0.04462704	0.835875023	0.927561294
FBgn0070395	XR_group6	9646318	9647169	+	852	0	710	3288	9	2	8	42	924	3959	10	482	763	0.407875756	4.061571922	0.237298823	0.635677285	0.824024033
FBgn0070397	XR_group6	9730220	9740201	+;+;+	1731	266	217	178	129	68	57	165	126	149	228	151	67	0.081399345	1.574131855	0.047592183	0.830599466	0.924717001
FBgn0070398	2	19817403	19818764	-;-	1292	88	163	177	273	59	58	223	142	185	87	218	60	0.004732055	1.409017561	0.000262836	0.98730436	0.994550009
FBgn0070399	XR_group8	3435315	3437781	+;+;+	2337	2723	1711	5276	2567	949	2659	2358	1399	1583	773	2729	606	-1.136778495	5.388982744	9.094371709	0.01125245	0.089235818
FBgn0070400	4_group4	3873377	3875769	+;+;+;+;+	2163	6184	7320	3738	7967	4076	3613	5915	3361	3704	2268	5781	2018	-0.617086967	6.466436102	19.13144285	0.000704941	0.016549383
FBgn0070401	XR_group8	3445902	3449531	+;+;+;+;+;+	2238	245	59	115	219	15	59	78	65	200	32	79	69	-0.584028278	0.883503901	1.596755229	0.227937666	0.495885128
FBgn0070402	4_group1	753257	754965	-;-	1650	14817	11950	7070	14959	6843	5558	10382	6147	8393	4110	9725	2707	-0.625483027	7.297961929	38.49333455	2.81E-05	0.002054977
FBgn0070403	XR_group8	3462480	3464753	+;+;+	2160	478	424	282	599	239	298	490	378	531	234	485	148	-0.124051216	2.844593121	0.48632442	0.497511224	0.737181935
FBgn0070404	XR_group6	3239694	3244743	-;-;-;-;-	3329	250	20	135	55	0	22	106	128	165	12	230	79	0.08658225	0.793964675	0.011382889	0.916723126	0.963104898
FBgn0070405	XR_group8	3472157	3559367	+;+;+;+	1712	194	216	80	245	107	70	370	175	167	107	349	42	0.316261064	1.641147546	1.230679723	0.286816739	0.559983908
FBgn0070406	XR_group6	5159312	5165291	-;-;-;-;-	2679	5743	3297	3204	5278	1622	1829	4674	3991	5061	1499	5737	2260	-0.029513721	6.049873045	0.073809722	0.790015451	0.904511946
FBgn0070407	XR_group8	3530005	3564045	+;+;+;+;+;+	5346	123	89	58	67	41	26	143	144	88	24	147	95	0.384422133	0.70870768	1.225613686	0.287768717	0.560955545
FBgn0070409	4_group1	743938	747920	-;-;-;-;-;-;-	3491	5567	3084	2291	3500	1674	1731	5198	3239	3979	1993	4479	1477	0.151312308	5.854442022	1.954699391	0.184828354	0.441322391
FBgn0070411	4_group1	742491	743786	-	1296	290	253	124	257	140	101	377	287	250	127	354	150	0.330067795	2.067233429	2.825513035	0.115960106	0.344062449
FBgn0070412	3	15677371	15680307	-;-	2878	1581	972	576	1397	531	533	1727	939	1625	668	1547	448	0.299666595	4.226359646	5.373640269	0.036865684	0.17899051
FBgn0070413	3	15556175	15653239	-;-;-;-;-;-;-;-	3589	9799	4843	4950	9471	2866	2321	7744	7271	8480	3081	8856	5035	0.167499363	6.825583879	1.284424239	0.276978108	0.550545064
FBgn0070414	2	5902908	5904762	+;+;+;+;+;+;+	1224	1311	873	576	1851	360	431	857	469	688	343	880	180	-0.650217503	3.682195922	11.60310313	0.004513188	0.052689103
FBgn0070415	XR_group6	12595837	12598119	+;+;+;+	1871	1434	1287	718	1471	531	597	1568	1118	1194	554	1613	569	0.032566166	4.263202089	0.089658978	0.769211979	0.89399512
FBgn0070416	3	3644477	3650618	-;-;-;-;-;-	4518	1582	655	407	750	238	319	551	339	565	252	651	264	-0.520066078	3.27660205	6.003516958	0.028735607	0.155849283
FBgn0070417	2	20585719	20588182	+	2464	3306	2233	1862	3626	1143	1175	2566	1761	2028	952	2345	836	-0.41551125	5.174187358	18.18688174	0.000866054	0.018930955
FBgn0070418	XR_group6	12589466	12594567	+;+;+;+;+;+;+;+;+;+	2734	155	68	40	333	85	109	258	118	174	38	104	55	0.012373145	1.215302393	0.000815524	0.977639188	0.99031566
FBgn0070419	XR_group6	12587400	12589302	-;-;-	1777	16250	12972	7575	14679	5154	5420	16622	8937	9539	5613	14451	5451	-0.080267864	7.528967875	0.683547877	0.422867628	0.679523109
FBgn0070420	XR_group6	12583734	12587422	+;+;+	1599	325	111	294	347	70	124	232	151	207	44	239	96	-0.693345557	1.768114339	5.642115887	0.033107156	0.168893644
FBgn0070421	2	20579872	20581372	+;+	1435	4742	3794	3805	2987	1255	857	1365	1153	602	271	1338	1751	-1.701462806	5.242509702	23.08846318	0.000443499	0.01217746
FBgn0070422	2	20577397	20578899	+;+	1427	5182	2968	3399	2421	842	989	2125	2383	1911	389	2176	2083	-0.850520617	5.374007794	10.61368418	0.006385433	0.063232531
FBgn0070424	2	24739069	24741170	-;-	2035	1268	1317	714	1345	499	465	1612	1079	1463	717	1629	453	0.233747079	4.243498798	2.874879817	0.113103747	0.339288139
FBgn0070426	XR_group6	3282080	3288383	-;-;-;-;-;-	5942	7676	9509	5270	6406	4018	2591	12448	7126	8702	3850	11321	3177	0.205319301	6.951836743	1.441914245	0.250657518	0.522259464
FBgn0070427	XR_group6	12576658	12578553	-;-;-;-;-;-	1584	5126	2938	1839	4039	1200	2189	3415	1619	1668	1288	2544	910	-0.563838083	5.456915873	15.92922878	0.001456712	0.025714817
FBgn0070429	3	17595138	17597506	-;-;-	1241	4248	3426	2375	4714	1360	1379	6426	4180	3559	2302	6407	2540	0.490064554	6.012249295	16.44811758	0.001287808	0.023911555
FBgn0070430	4_group5	130894	135035	-;-;-;-;-	3092	3210	1886	1444	2845	990	855	3299	1876	2519	1210	2992	1090	0.182947315	5.176826747	3.431330043	0.086156374	0.290180194
FBgn0070433	3	17593357	17594591	-;-;-	1114	12	690	59	0	0	0	3	31	947	0	1474	2239	0.140509935	3.318884655	0.009044022	0.925987455	0.968314543
FBgn0070436	2	20632005	20647088	+;+;+;+;+	5724	2293	1141	965	2550	873	643	1996	1839	1853	934	2532	1174	0.295526889	4.843720087	3.250146999	0.093977222	0.304691887
FBgn0070437	3	17157965	17159040	-;-;-;-	915	2669	1714	1567	2777	915	859	2148	1467	2214	754	1879	656	-0.312922159	4.882782152	5.89914385	0.02992447	0.159412657
FBgn0070439	4_group5	108414	129796	-;-;-;-;-;-;-;-	7058	29191	31079	19150	31325	13152	13951	33721	20957	23292	11830	32333	9443	-0.210763628	8.686851386	3.549854882	0.08146376	0.281387168
FBgn0070440	XR_group8	3569006	3579950	+;+;+;+;+;+;+;+;+;+	2156	1673	867	863	1442	549	486	1048	978	1186	417	1334	693	-0.180200358	4.149104129	1.521042089	0.238690557	0.507770598
FBgn0070441	3	17578358	17580233	+;+;+	1597	4476	3633	2256	4622	1534	1595	4640	2897	3878	1859	4498	1683	0.05040739	5.827611404	0.371105316	0.552606535	0.773865804
FBgn0070442	XR_group8	3583701	3585383	+;+;+	1547	17321	15230	8753	16946	6955	7104	19920	9339	12278	6877	17922	5591	-0.090447748	7.772483231	0.903238885	0.358767563	0.626616625
FBgn0070443	XR_group8	9187215	9191200	-;-;-;-	3629	2470	2072	1351	2940	973	971	2569	1737	2892	1151	2795	907	0.083927566	5.108001466	0.534986795	0.477133546	0.721918244
FBgn0070445	XR_group6	9789268	9792425	+;+	1267	223	145	161	133	60	93	174	79	146	64	152	18	-0.570899685	1.16321946	2.971728637	0.107745827	0.330713263
FBgn0070446	2	20546771	20548385	+;+	1557	199	272	120	250	253	37	326	415	414	68	423	181	0.322211701	2.2037556	0.471811324	0.504108998	0.742436516
FBgn0070450	2	20313201	20335344	+;+;+;+;+;+;+;+	4060	739	306	222	412	144	156	398	507	486	158	569	279	0.20980294	2.719875515	0.811259001	0.383674428	0.650229059
FBgn0070451	2	20537550	20539272	+;+;+;+;+	1467	1668	771	3481	914	362	330	798	469	465	106	297	640	-1.678217486	4.099514198	13.65585655	0.003271726	0.043213284
FBgn0070452	Unknown_group_454	4924	6764	+;+	1745	38544	30623	19496	32723	11847	17255	41066	26562	25231	15755	46247	17524	0.109014341	8.951758985	0.772673717	0.394904052	0.659670897
FBgn0070454	Unknown_group_454	17422	19443	+;+;+;+	1850	2119	1090	967	1845	589	694	1934	954	1467	751	1808	434	-0.02807112	4.446446516	0.043235297	0.838414555	0.928502078
FBgn0070455	XR_group5	606795	623876	-;-;-;-;-;-;-;-;-;-;-;-;-;-;-;-;-;-;-;-;-;-;-;-	6753	2110	2321	1227	2848	1083	1550	3673	1891	2103	1321	4012	1203	0.231780174	5.285741418	1.960974095	0.184170569	0.441114342
FBgn0070456	XR_group8	3908831	3911277	-;-;-	2270	11586	8500	6051	13425	4541	4918	13762	8513	9170	5094	13337	5113	0.111474359	7.308177397	1.676284836	0.217316983	0.483816057
FBgn0070457	XR_group8	3907000	3908875	+;+;+	1763	5085	3955	2790	5273	1178	1760	4591	2616	3043	1867	4242	1508	-0.186202133	5.8270577	2.002957806	0.179845192	0.43521025
FBgn0070459	4_group3	4796783	4797201	-	419	234	85	375	205	59	21	145	82	207	68	57	91	-0.612158833	1.389383903	1.589760477	0.228996485	0.496717083
FBgn0070460	XR_group6	3357361	3371017	+;+;+;+;+	3282	32	8	12	15	6	6	28	14	24	7	10	2	0.086735007	-1.850613494	0.024890176	0.876997198	0.945798976
FBgn0070461	XR_group8	3848700	3906567	-;-;-;-;-;-;-;-	5054	848	499	458	956	376	245	866	728	861	422	1302	599	0.432228742	3.6558487	5.987919362	0.028909699	0.156331646
FBgn0070462	XR_group6	9850126	9852394	+;+;+;+;+;+	1728	18250	12603	9684	16099	6049	6473	16673	10949	10529	6560	16781	7307	-0.061572543	7.728297448	0.397207088	0.539150662	0.766110535
FBgn0070463	XR_group6	9809340	9811187	+;+	1797	1031	545	517	799	329	292	723	587	718	198	749	305	-0.275208346	3.359215283	3.184788738	0.097007607	0.310365023
FBgn0070464	XR_group6	9812758	9815853	+;+;+;+;+;+;+;+	1753	9553	7178	5481	9977	3411	3548	9729	6512	8320	3606	9734	3510	-0.01780005	6.929688281	0.060385861	0.809616466	0.913693993
FBgn0070465	XR_group8	3845818	3847877	+;+	1736	11344	8925	5113	10525	3406	3733	9983	6870	7083	3198	11058	4799	-0.095662579	7.017737956	0.795119516	0.388311654	0.654029043
FBgn0070466	XR_group8	5630287	5739893	+;+;+;+;+;+;+;+;+;+;+;+;+	2951	2829	1697	1010	2193	853	626	1802	1387	1221	654	2248	1007	-0.174605231	4.722143711	1.102019187	0.312415999	0.584814399
FBgn0070467	2	21463250	21465401	-;-;-;-	1975	664	405	366	794	167	250	625	463	714	262	639	126	0.023458706	3.013239238	0.011160459	0.917433	0.963347285
FBgn0070468	XR_group6	1191125	1216598	+;+;+;+;+;+;+	1938	409	352	237	423	68	202	456	308	475	145	575	203	0.165908912	2.525595687	0.568519025	0.463911883	0.71207096
FBgn0070469	XR_group6	1120534	1121259	+;+	672	209	361	120	210	105	166	402	268	314	108	302	65	0.091706574	2.009545468	0.090128541	0.768627562	0.893637324
FBgn0070470	XR_group6	1121255	1122997	-;-;-	1623	919	581	359	826	279	414	775	593	659	287	790	167	-0.106887555	3.324255018	0.351919415	0.562922845	0.780944128
FBgn0070471	XR_group6	7995181	7997775	+;+;+;+;+;+;+	2211	124	79	104	135	37	51	111	64	84	73	132	11	-0.253669287	0.647111706	0.475971963	0.50204436	0.741012328
FBgn0070472	XR_group6	1124123	1125274	+	1152	707	506	226	929	148	185	1535	567	652	636	751	633	1.044650255	3.518028656	14.0275424	0.002354525	0.035114913
FBgn0070473	XR_group6	1125208	1127408	-;-;-	2068	868	411	248	594	291	160	592	442	612	187	634	129	-0.017102154	2.916078909	0.005154466	0.943827493	0.975277482
FBgn0070474	XR_group6	1184014	1185097	+;+	1001	16535	3245	5111	6638	1737	2373	6211	4545	6791	619	7083	2768	-0.622364384	6.481582221	2.119115118	0.17229348	0.425862393
FBgn0070475	XR_group6	1213076	1214459	-	1384	7180	6343	3427	6989	2505	3238	7008	3430	4122	2767	6765	2327	-0.213833618	6.42399808	3.577859118	0.080400367	0.278982666
FBgn0070476	2	21458120	21462931	-;-;-;-;-	3999	13518	8442	6806	13345	3796	4675	12145	9337	11795	5249	14778	4931	0.1377358	7.351458056	2.243387997	0.157403598	0.407460588
FBgn0070477	XR_group6	8058730	8061857	+;+;+;+;+	2871	14849	10550	8082	14241	5369	6321	14808	9917	11531	5007	14894	5289	-0.072983726	7.524385517	0.805424304	0.385341121	0.651222176
FBgn0070479	XR_group6	8067256	8069799	+;+;+	1766	597	166	384	446	31	62	412	482	775	40	783	392	0.198062555	2.714741508	0.195657261	0.665723409	0.838677909
FBgn0070480	Unknown_group_503	1690	4384	-;-;-;-	2505	8574	15735	7289	17010	4878	6140	9254	7965	6206	3903	10602	4109	-0.615949009	7.303514939	10.56312858	0.006214634	0.062688415
FBgn0070483	XR_group6	8087135	8098177	+;+;+;+;+;+;+	2516	141470	39863	56798	90351	29073	35994	59433	48899	60749	25529	91999	40181	-0.324655459	10.08613287	2.292870094	0.153683928	0.401986795
FBgn0070487	XR_group6	3474094	3490421	+;+;+;+;+	3086	162	101	84	197	51	72	204	134	157	99	173	53	0.313151275	1.197596729	1.948068927	0.185526691	0.442247747
FBgn0070491	XR_group6	3384530	3396307	+;+;+;+;+	3672	65	29	56	42	7	14	57	40	29	20	25	14	-0.223533334	-0.641820182	0.24422019	0.629188813	0.820857802
FBgn0070492	2	21378540	21382518	+;+;+;+;+;+;+	2064	4	5	2	15	49	5	33	12	24	9	15	8	0.784510029	-1.52622683	0.681770663	0.423456546	0.679631329
FBgn0070493	2	16099684	16101032	-	1349	3991	3446	1697	2485	771	1337	2423	1425	1693	973	2322	680	-0.576246538	5.122902905	10.38600091	0.006455127	0.06361768
FBgn0070494	2	21391077	21392664	+;+;+	1475	406	242	258	114	19	242	467	336	298	229	454	229	0.543127784	2.401585562	1.318978503	0.272285189	0.545275781
FBgn0070495	XR_group6	3252163	3254635	+;+;+;+;+	1807	4990	3598	3196	5232	1836	2495	4032	2439	3321	1241	4148	1151	-0.567839839	5.847623637	21.11704412	0.000466578	0.01253278
FBgn0070496	XL_group1a	6000286	6005733	-;-;-;-;-;-	2661	195	532	147	90	52	133	287	137	46	92	441	83	-0.317804356	1.768649633	0.380410473	0.548205466	0.770846691
FBgn0070498	4_group3	2217987	2241757	-;-;-;-;-;-;-;-;-	2885	375	234	86	288	170	131	424	272	305	153	353	177	0.462122385	2.207202762	4.120456512	0.062740618	0.241792564
FBgn0070499	XR_group6	3304602	3307921	-;-;-;-;-;-	2950	4124	3183	1706	4589	1318	1364	4183	3254	3417	1739	4810	2230	0.254801211	5.765507683	4.326625498	0.057273016	0.230087194
FBgn0070500	4_group3	7988253	7990257	+;+;+;+	1302	219	161	183	175	124	67	230	176	239	86	261	180	0.10658611	1.763690991	0.174000517	0.683196103	0.847982815
FBgn0070501	XR_group6	8103443	8105218	+;+;+;+	1525	1524	1513	976	2467	804	878	3026	1398	2759	1010	2779	927	0.419450017	4.914671668	7.586592903	0.016044705	0.109654997
FBgn0070502	4_group3	7985384	7986889	+;+	1440	8447	4510	4176	7713	2800	3152	5675	3477	3780	2060	6009	2064	-0.483722762	6.361915023	22.5484839	0.000351854	0.010707169
FBgn0070503	XR_group6	8105435	8107078	+;+	1576	2065	1570	998	2637	754	794	2370	1577	1786	908	2549	1102	0.187295132	4.856017595	2.546233121	0.133897999	0.37297109
FBgn0070504	XR_group6	8117612	8129904	+;+;+;+;+;+;+;+;+;+;+;+;+;+	2274	45	7	15	53	21	19	33	4	11	23	10	8	-0.561025079	-1.211369519	1.165344442	0.299436234	0.572632808
FBgn0070506	XR_group6	3301335	3303933	-;-;-	2029	743	530	348	717	235	224	536	587	624	212	634	384	-0.02276305	3.150605222	0.020008829	0.889620104	0.951004474
FBgn0070507	4_group5	85197	86561	-;-;-	1253	1017	619	445	883	250	226	848	403	809	340	726	239	-0.036312731	3.325797715	0.044685543	0.835769185	0.927530756
FBgn0070508	XR_group6	8166596	8176706	+;+;+;+;+;+;+;+;+;+;+	1973	0	5	0	7	7	1	14	0	26	2	13	0	1.196723227	-2.778680276	0.93920239	0.349676603	0.617462432
FBgn0070509	2	21246881	21273802	-;-;-;-;-;-;-;-;-;-;-;-;-;-;-;-;-;-;-;-;-;-	10237	1645	1940	831	1761	461	430	1956	1625	1529	649	2080	849	0.209411524	4.545190609	1.642168664	0.221792008	0.488950033
FBgn0070510	4_group5	68714	83964	-;-;-;-;-;-;-;-;-;-;-	12404	3279	2642	1663	3596	1327	1002	2958	2472	3009	1333	3081	991	-0.014619611	5.36800021	0.013826371	0.908142913	0.959422743
FBgn0070511	XR_group6	3311548	3346431	-;-;-;-;-;-;-;-;-;-;-;-;-	2258	888	959	448	1133	346	438	2789	1081	1155	519	1428	1336	0.885913797	4.269900878	11.60961324	0.004557705	0.05287442
FBgn0070513	XR_group6	8316535	8317331	+;+	688	7153	5600	3806	6738	2510	2923	7286	3765	5079	2985	5907	1984	-0.137799392	6.413310539	2.126600508	0.167833814	0.42083255
FBgn0070514	4_group3	7973666	7984505	+;+;+;+;+;+;+;+	5700	5301	3737	2447	5285	1889	1518	5065	3651	4157	1794	5711	2252	0.089915056	6.006800477	0.831591388	0.377950753	0.644711535
FBgn0070516	4_group3	7966882	7968706	+;+;+	1687	872	642	524	788	305	210	936	652	828	249	950	373	0.073403259	3.451361327	0.275294511	0.60838631	0.809760066
FBgn0070518	XR_group6	8318818	8321718	+;+;+;+	900	5008	3171	2506	5288	1691	1953	5254	3223	4125	2056	4991	1689	0.076114327	5.952008168	0.770604606	0.395520361	0.659670897
FBgn0070519	4_group3	7951840	7963209	+;+	1393	4345	3160	2079	5034	1258	1611	4435	4232	3568	1869	6331	4003	0.409190114	6.024853133	4.631043425	0.050199905	0.212528458
FBgn0070520	XR_group6	8326542	8329109	+	2568	356	150	113	220	65	70	155	188	202	101	306	115	0.163097472	1.624591184	0.404992992	0.535257876	0.763709933
FBgn0070521	XR_group6	8331345	8342262	+;+;+;+;+;+	3720	1910	1083	1013	1305	662	764	1879	1474	1888	771	2334	983	0.326956655	4.63826468	5.645971398	0.033056559	0.168867918
FBgn0070522	XR_group6	3276650	3278007	-;-	1300	1342	1047	911	1712	647	490	1106	754	689	448	783	316	-0.624581819	3.990043568	16.7979001	0.001186686	0.022872512
FBgn0070523	XL_group1e	8081726	8083804	+;+;+;+	1637	756	459	478	802	315	290	739	561	564	349	608	267	-0.03523341	3.275210943	0.056139703	0.816293919	0.917495125
FBgn0070525	4_group3	7940289	7942546	+;+;+;+;+	1565	693	557	850	563	193	205	757	1008	1032	187	1132	910	0.272747486	3.680128521	2.399011033	0.14473481	0.389350101
FBgn0070526	4_group3	656036	658710	+;+;+;+;+;+	2380	3433	2596	2225	3250	745	920	2753	2250	2594	991	3220	1272	-0.128602077	5.288718672	1.179744148	0.296589907	0.569116274
FBgn0070528	4_group1	755319	757154	+;+	1777	1963	1813	888	1879	873	652	1733	1136	1195	679	1749	516	-0.260780658	4.519290664	4.18273993	0.061025734	0.238592015
FBgn0070530	4_group4	3770561	3771403	+;+	766	284	98	63	173	82	70	127	104	151	32	112	86	-0.376135909	1.094811317	1.092192347	0.314500548	0.586415969
FBgn0070532	XR_group6	3263140	3266069	-;-;-;-;-;-	2419	3610	4990	1965	3672	1634	1916	2939	1983	2284	1052	3511	1209	-0.617787616	5.572796421	15.02402562	0.001816553	0.029943566
FBgn0070534	XR_group6	3254551	3262848	-;-;-;-;-;-;-;-;-	3468	258	471	230	390	157	160	500	336	412	236	573	182	0.292264513	2.598127941	2.104981177	0.169859148	0.423192758
FBgn0070535	4_group4	3781692	3782915	-;-;-;-;-	792	4102	1608	1654	3578	1100	1191	3462	1806	3270	1199	3445	1582	0.128679208	5.39052581	0.657161782	0.431747518	0.687901475
FBgn0070536	3	12334990	12338149	+;+;+	3043	1403	807	576	1218	534	412	1114	675	1065	401	1003	291	-0.173040742	3.835592043	1.467364662	0.246723205	0.516995821
FBgn0070538	XR_group3a	1259910	1262634	-;-;-;-;-	2477	1499	1228	554	1566	509	435	1186	624	851	372	808	256	-0.508905805	3.871205816	9.936411052	0.007406717	0.069821855
FBgn0070540	XR_group3a	1250094	1251410	-;-;-	1162	634	739	395	602	327	209	1183	842	1130	362	1219	503	0.648439602	3.623859303	16.58382827	0.001247437	0.023428528
FBgn0070541	XR_group3a	1248497	1249296	-	800	297	284	181	234	64	124	288	235	272	152	334	99	0.145865465	1.977265758	0.43478143	0.52084032	0.753282303
FBgn0070542	XR_group3a	1245063	1245599	-;-	468	1688	1141	823	1691	430	486	1501	1121	1595	534	1699	793	0.114642192	4.335185439	0.935829052	0.350514912	0.618157122
FBgn0070545	4_group3	7990845	7991537	+;+;+	488	7311	5905	3472	7726	2684	2884	7145	3800	5240	2524	6683	2642	-0.156759001	6.460088943	3.286666513	0.09233391	0.301961285
FBgn0070547	XR_group6	3275678	3276687	+;+;+	891	2436	628	450	1197	918	422	1427	1408	1659	315	2279	306	0.277712434	4.272835198	0.428730007	0.524971668	0.756237525
FBgn0070548	XR_group6	3278087	3279506	+;+	1346	12406	10075	5991	11423	4765	5037	15838	8167	9004	6850	12698	7050	0.273426214	7.41910483	4.339743439	0.056944744	0.229639608
FBgn0070550	Unknown_group_454	22770	23266	-;-	440	588	451	297	894	228	177	751	423	736	289	566	152	0.137708616	3.029786025	0.418035293	0.528854743	0.759294377
FBgn0070552	Unknown_group_454	19652	21831	-;-	2049	8267	6411	2385	6420	3210	3011	6720	4442	5237	2701	7938	2351	-0.031538013	6.485988266	0.050578177	0.825458625	0.922172067
FBgn0070553	XR_group6	3308635	3309595	+	961	1420	604	845	845	224	301	943	729	978	247	1175	502	-0.108732315	3.707476672	0.299043982	0.59348608	0.800924754
FBgn0070554	Unknown_group_454	14400	17349	-;-;-;-	2772	2587	2030	1465	2693	910	1036	3457	2225	2735	1318	3238	1006	0.296928762	5.217930349	9.499178684	0.008491655	0.075420162
FBgn0070555	Unknown_group_454	11836	13432	-;-;-	1325	11775	8099	6545	12818	5440	4703	10989	6322	9279	4457	9964	2946	-0.239979982	7.159744638	5.548195823	0.0343683	0.172569992
FBgn0070556	4_group2	857192	859064	-;-;-	1736	977	455	362	1095	725	543	1094	776	990	484	1029	327	0.229158464	3.818240744	1.054892898	0.322594017	0.592760957
FBgn0070557	2	1698024	1748867	-;-;-;-;-;-;-;-;-;-;-;-;-;-;-;-;-;-;-;-;-;-;-;-;-;-;-;-;-;-;-;-;-;-;-	9665	293	127	129	366	110	74	391	270	379	161	402	165	0.704505272	2.110917791	10.47482377	0.006284335	0.062887675
FBgn0070558	2	14471850	14473074	+	1225	7498	6682	5550	9511	2947	3335	8506	4783	5111	3214	8689	3144	-0.185720405	6.721344456	2.683575201	0.124679827	0.358045917
FBgn0070559	XL_group1e	5358693	5364354	+;+;+;+;+;+;+;+	3783	4628	3149	2385	4179	1146	1634	3975	2652	3932	1551	4477	1608	-0.005720627	5.726443529	0.003072115	0.956617696	0.979977643
FBgn0070561	XR_group6	3109714	3121410	-;-;-;-;-;-	3578	786	291	14	747	80	14	117	45	24	20	47	69	-2.141679651	1.530855586	5.484448446	0.037603334	0.1808383
FBgn0070562	4_group4	6382940	6408749	+;+;+;+;+;+;+	2608	768	473	251	486	279	331	671	394	565	284	489	191	0.017752224	3.016903558	0.011535536	0.91606265	0.962872121
FBgn0070564	XL_group1e	8046188	8074906	-;-;-;-;-;-;-;-;-;-;-;-	3327	18135	9314	7769	16728	4650	4261	11436	12689	13633	4970	15614	9963	0.098158244	7.620948353	0.32523512	0.577930231	0.790469482
FBgn0070565	4_group4	6424251	6428342	+;+;+;+;+;+;+	3598	269	177	136	353	77	99	211	150	204	89	267	68	-0.21916826	1.649205903	1.098342665	0.31319361	0.58540977
FBgn0070566	2	28611801	28614326	-;-;-	2405	2881	1247	1223	2187	605	689	2288	1677	1784	849	2761	801	0.1614268	4.801799894	1.168806205	0.298748511	0.571838836
FBgn0070569	4_group1	4934617	4936357	+;+;+;+;+	1482	6635	5765	3753	5948	3209	2888	4630	2756	4097	2034	4864	1454	-0.616617294	6.230655902	31.18689788	7.96E-05	0.004219487
FBgn0070570	XR_group8	6909001	6914261	+;+;+	3476	113	39	8	35	22	13	20	24	20	18	54	10	-0.30412842	-0.780382983	0.336971227	0.571230834	0.785739543
FBgn0070571	XR_group8	6917735	6919521	+;+;+	1669	2351	2819	1046	1511	924	1557	2435	1590	1904	883	2390	918	-0.167035163	5.00197399	0.568627467	0.463934569	0.71207096
FBgn0070575	4_group4	3574468	3591301	-;-	3547	9393	6928	5277	9292	3080	3637	8348	5044	6570	3531	7984	1987	-0.239043228	6.746443816	4.318558473	0.057476008	0.230579113
FBgn0070576	4_group4	6353736	6364372	-;-;-	4644	2809	1573	1468	2213	761	708	1766	1295	1683	747	2171	917	-0.22542387	4.777228142	3.656069556	0.077517748	0.273740484
FBgn0070577	XR_group6	4905746	4925249	+;+;+;+;+;+	2172	54	12	4	30	2	3	76	41	62	6	40	30	1.371253183	-0.886973904	3.862923684	0.070471482	0.259103079
FBgn0070578	4_group4	3568917	3570380	+	1464	182	169	105	249	89	69	218	161	294	76	319	66	0.190608203	1.569211211	0.611869596	0.447707706	0.699316667
FBgn0070579	4_group4	3571095	3573200	+;+;+	1970	17671	14659	8342	21817	5151	10116	19049	10033	12060	6214	16646	5116	-0.234398557	7.7905213	2.460120246	0.140109216	0.381903568
FBgn0070580	4_group4	3562497	3567813	-;-;-;-;-;-;-;-	2274	10228	8397	4424	7052	3289	3280	10879	6602	7225	3957	11533	4725	0.218557341	6.95534568	3.219873609	0.095366386	0.307144348
FBgn0070581	XR_group8	6369184	6372576	-;-;-;-;-;-;-	2111	1626	1306	846	2246	442	640	1857	1706	1482	576	2390	995	0.213763883	4.585353418	1.75363321	0.207597784	0.471578592
FBgn0070582	XR_group8	6349755	6350855	-;-;-;-	936	3	6	19	6	10	14	16	8	18	16	38	2	0.288150101	-1.784950294	0.15921244	0.696178276	0.855399643
FBgn0070583	4_group4	3609743	3612673	+;+;+;+	2731	1652	1335	815	2111	475	688	1525	1008	1451	678	1548	470	-0.106873754	4.362603918	0.566211827	0.464801651	0.71288031
FBgn0070584	4_group4	3604985	3606405	+;+;+	1299	422	285	235	503	253	207	485	317	454	201	482	98	0.003545174	2.606358518	0.000311477	0.986179573	0.994030566
FBgn0070585	4_group4	3595450	3597846	+;+	2332	3099	880	1397	2150	438	528	2901	2238	2637	287	2624	847	0.16528185	4.809676673	0.225746832	0.643169354	0.828253248
FBgn0070586	XR_group8	6339348	6345879	-;-;-;-;-;-;-;-	5389	10920	9816	6572	12123	4727	5199	11566	6840	9514	4174	10892	3119	-0.224986049	7.185434577	4.809969885	0.046526405	0.204101946
FBgn0070587	XR_group6	9604866	9606300	-;-;-;-;-	1183	1966	1223	819	1544	501	587	1592	1145	1343	542	1747	794	0.031218652	4.378299481	0.067671603	0.798717978	0.908725012
FBgn0070588	3	9890816	9902981	+;+;+;+;+;+;+;+;+;+;+;+;+;+;+;+;+;+	4640	861	624	770	1300	213	288	1706	1192	1337	426	1469	667	0.589544369	4.003298385	10.95980695	0.005439179	0.058267851
FBgn0070589	XR_group8	4048564	4062291	-;-;-;-;-;-;-;-;-;-;-;-;-;-;-;-;-	4943	209	244	65	281	191	82	351	398	175	262	432	170	0.885088541	2.217554152	6.875187145	0.020700937	0.127747259
FBgn0070590	4_group4	6330942	6335733	-;-;-;-;-;-;-;-;-	4171	617	610	346	789	204	220	711	510	497	337	673	169	0.046608609	3.093488286	0.06757169	0.798863069	0.908725012
FBgn0070591	2	24535075	24537381	-;-;-;-	2131	1393	1594	703	1833	891	913	2874	1435	2224	1026	2729	835	0.496523425	4.819564149	9.355724403	0.00888705	0.077462372
FBgn0070592	XR_group8	6929931	6946404	-;-;-;-;-	3754	1516	778	751	1428	438	524	1208	853	1219	559	1397	646	0.077942683	4.116534472	0.341024505	0.568953721	0.784695586
FBgn0070594	XR_group8	6914368	6917209	-;-;-	2735	5881	4752	2835	6603	2445	3109	4948	2875	3547	2012	5125	1473	-0.418703435	6.135654689	16.1006503	0.001398232	0.025166468
FBgn0070596	4_group4	3573269	3574490	+;+	1167	192	145	153	245	45	71	242	183	225	54	196	103	0.02719889	1.48507521	0.014569044	0.905720672	0.957938634
FBgn0070597	XR_group6	4332148	4333271	-	1124	3000	2263	1656	2859	1117	1345	3041	1579	1735	1162	2891	983	-0.176570354	5.185528787	2.734332578	0.121472015	0.353185267
FBgn0070598	XR_group6	4333514	4334809	+	1296	6940	4617	2805	4611	1994	2632	6233	3046	3135	2252	6010	2385	-0.067818454	6.160718484	0.22132573	0.645608549	0.829940484
FBgn0070599	4_group4	6210614	6212011	-;-;-;-	1200	8582	7123	3809	8455	3330	2812	6472	3427	4824	2216	5525	1433	-0.577073563	6.442447503	23.16432283	0.000312759	0.010140145
FBgn0070600	3	4800313	4800905	+;+;+	479	3410	3835	1204	3716	1207	896	4475	2452	2879	1537	3757	1648	0.235235636	5.527637991	1.648595183	0.220939909	0.48830218
FBgn0070601	XR_group6	3522903	3524265	-;-	634	1315	796	487	1311	649	395	1214	924	1517	355	1487	361	0.102953285	4.001885743	0.214585257	0.650642031	0.831822729
FBgn0070602	XR_group6	11678550	11679467	+	918	1746	1124	835	1223	521	823	1347	702	1228	506	1290	403	-0.309392677	4.177321958	4.117349745	0.062827653	0.241846762
FBgn0070604	4_group4	3570455	3571078	-;-;-	507	1229	1234	786	1486	474	499	1389	755	1162	440	1461	469	-0.160318684	4.093594421	1.865565444	0.194504844	0.45422745
FBgn0070608	XL_group1e	3992991	3994010	-	1020	5127	3682	2956	4375	2330	2623	4776	2549	2739	1745	3812	1214	-0.428942995	5.899136491	12.61679996	0.003399436	0.044295206
FBgn0070609	XL_group1e	3979464	3982041	-	2578	714	400	198	546	173	177	636	571	567	197	695	320	0.398296057	2.952068533	4.160283018	0.061637532	0.239552907
FBgn0070612	XR_group6	6408428	6413978	+;+;+;+;+	3244	371	360	242	558	165	145	291	238	221	162	362	128	-0.402315046	2.325054176	4.839119207	0.045958553	0.202761569
FBgn0070613	XL_group1a	2471646	2477682	+;+;+;+	5335	5933	4766	3107	7027	2679	2694	6347	4126	6321	3076	6604	2004	0.073049273	6.388445164	0.466686436	0.506173412	0.744027221
FBgn0070614	XL_group1a	2470418	2471550	+;+	1073	506	233	193	529	171	226	380	322	365	125	525	231	-0.037719804	2.54798321	0.026486339	0.873150602	0.943817833
FBgn0070617	XR_group6	4961331	4963295	+;+;+;+	1335	97	35	44	138	6	26	33	27	38	0	41	6	-1.666907543	-0.490937826	5.3530258	0.037174508	0.179991221
FBgn0070619	XL_group1e	2748176	2749898	-	1723	3442	2007	1418	2948	1167	1266	2154	1141	1240	896	1804	465	-0.664312734	4.931009045	42.3287556	1.73E-05	0.001556772
FBgn0070621	3	19400646	19401795	+;+	1090	167	220	115	255	93	90	269	121	177	62	267	120	-0.095087742	1.589602628	0.160813856	0.694739117	0.854432541
FBgn0070622	XL_group1a	7388207	7400239	+;+;+	4518	2411	977	1116	1577	549	671	1041	1349	1841	804	1833	1353	0.146233575	4.621347869	0.366243187	0.555243405	0.775324196
FBgn0070623	4_group5	348501	350144	+	1644	967	851	568	965	319	174	855	442	778	447	748	178	-0.160843162	3.441150617	0.45389113	0.511964214	0.746907021
FBgn0070624	XL_group1a	7525466	7527065	+;+;+	1465	1101	1072	501	1498	438	487	1382	864	1368	591	1292	618	0.242035277	4.096347822	2.727543602	0.121895143	0.353669295
FBgn0070625	XL_group1e	8851648	8856265	-;-;-;-;-;-;-;-;-;-	3975	2341	1441	893	1711	675	642	1614	1096	1823	736	1420	555	-0.091645039	4.496122076	0.435638754	0.520436073	0.752987484
FBgn0070626	XL_group1a	7518629	7525278	-;-;-;-;-;-	5525	91	159	60	131	77	38	125	94	170	69	170	73	0.207516774	0.997968138	0.465480593	0.506714093	0.744136574
FBgn0070627	4_group5	351091	357751	+;+;+;+	6488	2780	1771	1264	1924	837	1202	2023	1503	1929	783	2489	869	-0.154936627	4.896519298	1.391281218	0.258737578	0.531553897
FBgn0070628	4_group5	358295	395431	-;-;-;-;-;-;-	2833	895	292	501	986	231	303	703	710	744	189	869	366	-0.036129156	3.344987909	0.022478282	0.883058309	0.948455624
FBgn0070629	3	14379202	14382666	+;+;+;+;+	2688	289	169	74	100	78	145	438	91	297	158	154	107	0.591246752	1.730684807	2.83404105	0.115460419	0.343342208
FBgn0070630	XR_group6	9843009	9844156	-	1148	1067	816	604	1118	266	441	2017	1158	1771	766	1656	644	0.82901364	4.206919794	34.67702788	4.74E-05	0.002965173
FBgn0070631	2	21217235	21218900	-;-;-;-;-	1227	2831	1704	1471	2490	897	1122	2484	2160	2427	950	3035	1486	0.124330434	5.152938195	1.007704992	0.333263523	0.602269148
FBgn0070632	Unknown_group_8	34678	53538	+;+;+;+;+;+;+;+;+;+;+;+;+;+;+;+;+	6374	88304	78610	47061	80020	32659	37202	97357	62210	63785	35782	96108	40276	0.029719688	10.19008398	0.084150311	0.776197036	0.897638257
FBgn0070633	3	644705	646319	+;+	1536	1	19	0	2	6	0	36	20	26	22	11	0	1.890409107	-1.95757574	3.326571857	0.090577827	0.298859418
FBgn0070634	3	5300670	5301021	+	352	279	53	38	468	390	73	148	101	83	22	287	180	-0.598396623	1.827118277	0.336521208	0.572755538	0.786438687
FBgn0070635	2	26769111	26771664	-;-;-;-	2385	664	285	299	573	191	179	568	403	463	235	495	272	0.168676753	2.827966172	0.991389497	0.337070147	0.606164962
FBgn0070636	2	5601871	5617141	-;-;-;-;-	5226	21	122	12	92	0	12	102	69	138	58	93	53	1.120265374	0.24350228	2.614781397	0.129344852	0.365324584
FBgn0070637	2	25561078	25562849	+	1772	309	149	69	89	59	36	44	31	56	10	66	47	-1.683822679	0.544907046	13.80523874	0.002475892	0.03614655
FBgn0070638	2	29160969	29163051	-	2083	1704	1254	957	2634	883	858	3531	1837	2244	1356	2789	1018	0.609862277	5.004050721	22.69133019	0.000342307	0.010614816
FBgn0070639	2	12612950	12614912	+;+	1895	1078	105	697	668	262	382	874	1042	1503	476	1665	501	0.716547318	3.81732749	2.945007884	0.111841653	0.337431873
FBgn0070640	2	12725660	12728887	+	3228	93	29	23	55	5	24	70	33	53	12	48	41	0.128946713	-0.412927661	0.066195337	0.800873592	0.910259205
FBgn0070641	4_group3	6987187	6989600	+;+;+;+;+;+	1658	823	90	52	61	39	52	138	72	76	56	80	38	-0.622694413	1.103371451	1.144487826	0.303688254	0.576187752
FBgn0070642	4_group1	1497450	1498190	-	741	3290	3061	1178	2590	1089	1094	2771	1380	1584	946	2466	1097	-0.288567237	5.099007289	3.397131511	0.087570509	0.292772153
FBgn0070643	4_group3	4128295	4128725	+	431	4086	1970	1814	4421	1431	1112	3639	2015	2621	1236	3797	1070	-0.075643727	5.43114347	0.31230476	0.585501729	0.794995041
FBgn0070644	4_group4	4822229	4823094	+;+	811	5410	4839	2813	4857	1600	1754	4339	2325	2800	1576	4242	1316	-0.429505908	5.827118806	13.70947384	0.002538502	0.036804513
FBgn0070645	2	24742875	24748394	-;-;-;-;-;-;-;-	4636	8758	5172	4214	8285	2885	2349	7771	6389	6512	3601	8605	3842	0.207092052	6.704187936	3.578525483	0.080375267	0.278982666
FBgn0070646	XR_group8	5527142	5564290	-;-;-;-;-;-;-;-;-	4321	19896	12456	8737	14367	6134	6030	8965	6064	7774	3341	9037	3433	-0.880158939	7.339531179	106.9006367	9.38E-08	4.18E-05
FBgn0070647	2	16906559	16909506	+;+;+;+;+;+;+;+;+	2405	30215	22554	14060	24571	11171	11956	32402	18694	18330	13457	32172	11265	0.103000249	8.533897949	1.034789754	0.327079023	0.596875462
FBgn0070650	3	13902276	13927810	+;+;+;+;+;+;+;+;+;+;+;+;+;+;+;+;+;+;+;+;+;+;+;+;+;+;+;+;+;+;+	16249	747	1319	409	759	394	291	748	437	608	256	453	236	-0.614482449	3.363612909	6.621036293	0.022735322	0.135286677
FBgn0070651	2	10028613	10030298	-;-	1625	30003	20930	15702	24939	10374	12767	24366	14443	16429	9478	23065	8166	-0.335100892	8.345636445	14.43133578	0.002107859	0.032685565
FBgn0070652	4_group1	2632457	2633321	-;-;-	718	751	907	424	801	331	266	963	566	770	326	770	321	-0.006510258	3.450829525	0.001796967	0.966813377	0.985345368
FBgn0070653	XR_group6	4876726	4900885	+;+;+;+;+;+;+;+;+;+;+;+;+	7971	5195	4868	2682	5138	1857	1551	5697	3615	3986	2566	5436	2594	0.161628785	6.113727126	1.700389976	0.214225828	0.480063279
FBgn0070654	XR_group8	547141	548627	+;+;+;+	1119	6862	3346	2373	4357	1754	1736	4135	2849	3841	1677	3960	2149	-0.124705372	5.891882411	0.83506269	0.376986425	0.644144978
FBgn0070656	2	16937504	16943049	+;+;+;+;+;+;+;+;+;+	1656	10658	5775	5090	9874	3713	3943	9012	5504	8557	4200	9001	2606	-0.036150126	6.88914428	0.114681282	0.740131859	0.88018758
FBgn0070658	XR_group6	6879799	6881903	-;-	1485	8497	7464	4020	7330	3598	3535	11074	5803	5582	3441	10895	3802	0.133682992	6.837592732	1.040715671	0.325747778	0.595353113
FBgn0070659	XR_group6	6771253	6861743	-;-;-;-;-;-;-;-;-;-;-;-;-	5683	2714	1550	1296	1823	907	1277	1661	1129	1556	748	1945	1038	-0.333481024	4.813678044	3.644612495	0.077932162	0.274540301
FBgn0070660	4_group1	2179028	2181148	+;+	2060	1061	2277	898	1835	468	568	1075	654	895	376	926	246	-0.899541088	4.084406711	15.02522604	0.001816012	0.029943566
FBgn0070663	XR_group8	587986	589467	-;-;-;-;-;-	1072	3221	2679	2611	3079	1220	1342	3479	2590	3586	1373	4715	1892	0.108613634	5.613879334	1.121746835	0.308289424	0.580865525
FBgn0070664	2	11974453	11976916	+	2464	58	47	75	51	18	17	57	39	41	17	64	21	-0.390938731	-0.305335235	1.325885605	0.269700112	0.543007015
FBgn0070665	XR_group8	584905	586948	-;-;-	1776	554	497	419	714	281	224	534	282	439	265	413	237	-0.335511054	2.943818	3.715392487	0.075413827	0.269686602
FBgn0070666	2	9539721	9562172	+;+;+;+;+;+;+;+;+;+;+;+	4318	74128	49150	35281	55244	22969	27874	64669	38971	37306	27553	60675	22306	-0.101223892	9.635097684	0.89695271	0.360392171	0.627811626
FBgn0070667	4_group3	6287536	6289830	+;+;+	2150	74160	54448	44518	77766	27959	35704	67322	39517	40215	26964	65457	21435	-0.346747811	9.79692534	10.90818089	0.005522587	0.058818159
FBgn0070669	4_group3	4233917	4236304	+;+;+;+	1474	1291	1018	817	1337	459	628	1267	838	803	605	1385	677	-0.040959256	4.132842923	0.070068062	0.795271749	0.907108316
FBgn0070670	2	4531	6074	+	1544	468	368	335	380	115	123	371	259	311	86	390	197	-0.379796467	2.365590213	5.176266818	0.039951594	0.186656688
FBgn0070671	2	23393713	23396309	-;-;-;-;-	1778	27530	22220	16944	28633	9137	11081	26489	19102	22386	10008	29289	14518	-0.03922338	8.512086832	0.189094542	0.670602912	0.84098268
FBgn0070672	4_group3	4214464	4215634	+;+	1107	594	337	348	714	198	215	604	439	632	252	579	196	0.104270516	2.946642853	0.409002942	0.533273703	0.762444792
FBgn0070673	2	15407544	15408789	+;+;+	1158	7706	8304	4283	11134	4523	3975	9317	4064	6287	3193	7721	2558	-0.347255324	6.808987397	7.048161114	0.019437766	0.122577273
FBgn0070676	2	27825980	27827771	+	1792	633	436	410	803	316	307	677	358	598	280	768	169	-0.147055071	3.137827942	0.775247327	0.394139525	0.659308338
FBgn0070678	4_group4	3607040	3609445	-;-;-;-;-;-	2058	2357	1738	1463	2699	1066	1052	1739	1242	1881	944	1732	571	-0.408282545	4.849481416	9.600447628	0.008224812	0.074200132
FBgn0070679	3	4655237	4669130	-;-;-;-;-;-;-;-;-;-;-;-;-;-;-;-	11136	4048	2617	1946	3198	1153	1150	3247	2432	3012	1555	3151	1044	0.013019297	5.432062308	0.012603728	0.912279125	0.961563814
FBgn0070680	2	25681473	25683498	+;+;+	1876	5599	4383	2653	4195	1788	2455	5166	3273	2764	1694	4958	2178	-0.166994873	5.990790826	1.315183078	0.271553689	0.544404726
FBgn0070681	2	24768	25892	-;-;-;-	966	1300	7789	4966	3963	3668	2101	10269	5598	5687	3759	11105	4536	0.472568051	6.699315322	1.361885645	0.266964417	0.54014415
FBgn0070683	2	23020407	23024560	-;-;-;-;-;-	3201	69	51	9	123	22	27	122	134	102	45	196	74	1.214958888	0.557856593	7.504000569	0.016517337	0.111184809
FBgn0070684	2	24217801	24218945	-;-;-;-	974	1077	527	416	734	195	235	606	353	489	223	614	199	-0.36654863	3.057222524	4.701908928	0.048705288	0.208530111
FBgn0070685	3	7536702	7537849	-;-	1085	764	504	330	487	300	204	686	359	629	311	597	276	0.121471038	3.079069946	0.538764736	0.475612032	0.720804242
FBgn0070686	XR_group8	4312145	4313944	-;-;-;-	1613	4443	4208	2855	6053	2848	2177	12493	6810	8615	5090	9805	3392	0.966283605	6.718108346	61.65905436	2.28E-06	0.000400042
FBgn0070687	4_group3	8739881	8741055	+;+;+	1042	7122	5723	4203	7409	2531	2789	7428	5034	6387	2476	6981	2682	-0.069269083	6.52362924	0.775578371	0.394041349	0.659219192
FBgn0070688	2	11452545	11453474	+	930	2550	2568	1163	2632	1223	1465	3230	1454	2196	989	2928	809	-0.122101756	5.148142823	0.659844493	0.430831127	0.686933739
FBgn0070689	2	30235182	30237812	+;+;+;+;+;+;+;+;+	1894	27940	16750	19215	15358	16981	12817	28930	17162	16167	8476	27691	7947	-0.275645913	8.424047506	1.454236366	0.249974434	0.521189376
FBgn0070691	3	6407992	6409330	-;-	1266	16	1781	3383	853	2	160	1660	5185	4741	9	5823	7672	1.138183677	5.744128454	2.203110062	0.16649415	0.419195871
FBgn0070692	3	6412951	6413883	-;-	874	14	292	140	12	10	12	43	397	927	15	662	1033	1.424866212	2.630583715	6.458587933	0.025538262	0.144353623
FBgn0070693	3	6476238	6478048	-;-;-	1382	938	452	362	597	201	158	668	604	400	171	695	391	0.028587543	3.077411791	0.014871658	0.904751715	0.957885224
FBgn0070694	3	6652405	6654862	+;+;+	2319	4831	4361	2662	4156	1989	1871	6083	3261	4120	1810	5569	1397	0.007082983	5.981012709	0.003125766	0.956240947	0.979858424
FBgn0070695	3	6655584	6659705	+;+;+;+;+	3497	2280	1644	1268	2602	780	735	1985	1487	1926	905	2397	730	-0.040557977	4.814346142	0.137947379	0.716145414	0.867680886
FBgn0070696	3	11344580	11345857	+;+;+	1160	6373	3777	2206	5831	1868	1483	5204	2999	2571	1623	4408	1929	-0.16516365	5.90210386	1.188147756	0.294946114	0.567377508
FBgn0070697	3	11400968	11404801	+	3834	18	15	9	8	8	20	11	22	6	17	18	29	0.481113776	-1.485934763	0.449760426	0.513859342	0.748270093
FBgn0070699	2	24854002	24855612	-;-	1555	4	17	2	29	3	22	21	25	19	10	38	12	0.581923087	-1.509924424	0.621100072	0.444377943	0.697209577
FBgn0070701	4_group4	2601933	2603551	-;-	1559	1851	803	916	1681	570	571	1711	1165	1759	891	1779	452	0.270575027	4.41468462	2.735727698	0.121385286	0.353026871
FBgn0070702	XR_group3a	1461881	1465973	+;+;+;+;+	2791	3216	2936	1726	3245	1379	1208	3350	2060	2582	1248	3051	742	-0.170542129	5.335941762	1.734916074	0.209897102	0.474777351
FBgn0070703	3	8004553	8012391	-;-	2403	1004	1215	567	1142	322	364	943	597	580	443	1075	331	-0.246536519	3.697174602	1.985418518	0.181636288	0.437972773
FBgn0070704	3	8726002	8727316	-	1315	601	364	350	738	253	214	621	424	677	230	696	158	0.032382554	2.990541685	0.031154613	0.862539654	0.939538375
FBgn0070706	3	16452004	16453349	+;+	1287	2558	2131	1647	3856	1734	1260	3180	1535	2961	1167	2932	728	-0.19379687	5.297463032	1.242058408	0.284694243	0.557507246
FBgn0070707	XL_group1e	12321508	12323059	+	1552	582	457	343	995	221	221	617	491	477	263	704	324	0.014689632	3.111769556	0.006849956	0.935264261	0.972406625
FBgn0070709	3	10690074	10724685	+;+;+;+;+;+;+;+;+;+	6830	84	127	56	231	50	10	179	165	198	151	204	78	0.967111752	1.246188107	5.396023669	0.036533775	0.178249561
FBgn0070710	3	4766667	4767690	+;+	961	26787	16497	13033	23686	7766	9738	20233	12008	17514	8617	20465	8280	-0.202345113	8.137089891	5.341201254	0.037353027	0.180337867
FBgn0070711	3	16841615	16851139	+;+	1805	2484	1020	1156	1628	533	586	1243	1372	1423	456	1507	989	-0.212780196	4.461555314	1.201721688	0.292317492	0.565052252
FBgn0070713	XL_group1e	409332	410569	+;+;+	933	18123	8549	8800	16499	4221	4886	12588	11561	15508	4654	17341	6970	0.039729093	7.589392282	0.083267135	0.777339892	0.898394003
FBgn0070714	XL_group1e	400627	403417	+;+;+;+;+;+;+;+	2178	298	137	158	236	24	114	307	195	186	101	163	55	0.034337341	1.566153326	0.009503967	0.92378393	0.966858222
FBgn0070715	4_group4	2641146	2642702	-	1557	15984	12594	9725	17596	7251	8316	20828	9967	11137	7950	21183	8676	0.075695167	7.880954758	0.296995088	0.594740414	0.801729754
FBgn0070716	XR_group6	11640366	11647164	+;+;+;+;+;+;+	2684	712	532	272	708	200	273	666	537	653	268	704	264	0.159463968	3.125076746	1.158045529	0.300893481	0.573635724
FBgn0070717	4_group4	2642717	2670670	-;-;-	1479	499	406	289	703	165	170	555	383	441	228	508	167	0.011057691	2.75656985	0.004628163	0.946767458	0.976685561
FBgn0070718	2	1577412	1580890	+;+;+;+;+;+;+;+;+	2995	0	6	88	0	6	0	156	96	118	40	103	29	2.578830361	0.007032733	5.049984235	0.043859631	0.197481809
FBgn0070720	4_group4	2672343	2678401	+;+;+;+;+;+;+;+;+	2143	6104	5865	2701	7448	2843	2320	7974	5490	5997	3070	8523	4076	0.32023281	6.579760265	5.478790728	0.035336667	0.175571591
FBgn0070721	3	14872438	14875561	-;-;-;-	2856	2438	2069	1246	2111	844	758	2163	1384	2046	773	2212	663	-0.152584962	4.808085484	1.740183137	0.209246746	0.473723292
FBgn0070723	XL_group1e	3960258	3963497	+	3240	16628	13771	7540	16561	6566	6526	18420	10951	11397	6977	17987	5733	0.034436206	7.720914839	0.152248319	0.702537129	0.858916409
FBgn0070724	XL_group1e	3977463	3979195	+;+	1669	75	63	21	113	35	16	89	91	80	31	129	45	0.494434293	0.258920954	1.775281587	0.204978853	0.46798141
FBgn0070726	XL_group1e	3985596	3988061	-	2466	1047	1027	682	1097	463	397	1670	707	1188	465	1297	369	0.112165148	3.95770217	0.541701229	0.474435123	0.719688975
FBgn0070728	XL_group3a	1965598	1968278	+;+;+	1150	528	207	220	481	126	166	437	269	581	114	469	209	0.103463142	2.497084838	0.190284143	0.669636361	0.840306667
FBgn0070729	XL_group1e	1968971	1970012	+;+	982	50	72	53	129	43	44	70	109	81	65	73	43	0.202833237	0.476247925	0.320392167	0.58074212	0.792396833
FBgn0070731	XR_group6	11686445	11704546	+;+;+;+;+;+;+;+;+;+;+;+	3976	13184	10269	7679	10258	4721	5023	15333	10598	11334	8506	15957	8503	0.442868424	7.587500078	10.14335249	0.006949828	0.067196919
FBgn0070733	XL_group1e	8256942	8259472	-;-;-;-;-;-;-	2115	189017	132562	78020	110972	58406	76555	218617	129985	129622	80027	225668	97353	0.377273469	11.20281382	5.803866289	0.031060439	0.163331423
FBgn0070735	3	8918458	8921113	+;+;+;+;+;+;+	2314	55	53	70	44	41	36	67	27	46	49	116	8	-0.219330316	0.015794151	0.237841732	0.633663298	0.823302624
FBgn0070736	XR_group6	3532121	3534284	-;-;-;-;-;-	1540	3751	2748	1287	2966	1398	1316	4098	2304	3042	1299	4095	1412	0.207253973	5.481547028	2.963756295	0.108175002	0.331545546
FBgn0070737	XR_group6	3513828	3520615	+;+;+;+;+;+;+;+;+;+;+;+	4690	3125	2486	1652	2911	1097	1007	3157	2634	2955	1269	3479	1315	0.175665161	5.358960225	3.742519281	0.074474632	0.267250374
FBgn0070739	2	17444960	17446354	+;+;+;+	1204	1937	1256	821	2047	432	553	1792	1424	1854	769	2032	729	0.275037194	4.53041295	3.851188641	0.070850109	0.260013879
FBgn0070740	2	12370635	12374984	-;-;-;-;-	3955	20301	20220	13405	20844	7786	9990	22043	12936	15888	8032	20503	6878	-0.231646727	8.100591011	5.025470989	0.042515909	0.193562045
FBgn0070741	2	17414751	17417429	+;+	2611	5350	2597	2980	4572	1835	1951	4128	3003	3745	2272	4358	1502	-0.043786494	5.89346078	0.117429589	0.737163095	0.878363976
FBgn0070742	2	12344891	12346410	-;-;-;-	1331	2135	1874	1333	2089	1114	1202	2662	1923	2598	1030	2686	828	0.100609508	5.059396986	0.509711107	0.487532446	0.729015377
FBgn0070743	XR_group6	3528602	3531161	+;+;+	2072	8642	7044	5072	8076	2920	3357	7259	4771	5732	2548	7343	2826	-0.326606254	6.645093543	18.5746934	0.000795247	0.017723511
FBgn0070744	XL_group1e	1268573	1279223	-;-;-;-;-;-;-;-;-;-;-;-;-;-;-	3596	2904	1892	1392	2810	827	794	2296	1763	2299	1032	2743	964	0.025245404	5.02143089	0.056791229	0.815252333	0.917290108
FBgn0070745	XL_group1e	1281030	1287840	-;-;-;-;-	3503	2796	1889	1684	3249	1116	1490	2366	1388	2454	1229	2490	1268	-0.171488431	5.208671362	1.296732502	0.274789974	0.548124452
FBgn0070747	4_group1	4947701	4956672	+;+;+;+;+;+;+;+;+;+;+;+;+;+;+	6944	23889	15828	12077	19184	8189	7878	18865	11618	13145	7417	17797	6610	-0.263452262	7.958157208	11.08491212	0.005243037	0.05712499
FBgn0070749	2	16109342	16110332	-;-	927	292	362	142	114	83	78	239	189	452	75	337	301	0.209834112	2.071262612	0.408947093	0.533301242	0.762444792
FBgn0070750	XL_group1e	1324941	1326668	-;-;-;-	1393	11993	6521	5786	10875	3436	3800	7058	5807	7590	3260	11244	6365	-0.130577334	7.015133477	0.596328046	0.45340757	0.703548234
FBgn0070753	XL_group1e	6514987	6522054	+;+;+;+	1240	2132	1412	1145	1862	797	674	1893	1395	1608	726	2246	1043	0.044021302	4.703801839	0.149176529	0.705395707	0.861264174
FBgn0070754	XL_group1e	9536965	9539197	-;-;-	2100	32060	14248	16637	20700	11976	16187	19461	9895	11589	9892	19955	4602	-0.634049165	8.225407654	13.43876287	0.002725625	0.038675733
FBgn0070756	2	17455263	17457373	+;+;+;+	1875	17533	13560	9227	18692	6353	7502	15159	9832	13361	6164	15338	4503	-0.257825644	7.702412648	8.062333497	0.013610141	0.099643168
FBgn0070757	2	12361790	12367357	-;-;-;-	2568	38	6	2	8	3	4	22	5	30	2	24	16	0.71342994	-1.909797427	0.709266004	0.41448839	0.673629632
FBgn0070758	3	10004458	10005340	+;+;+	675	6999	5556	3857	8621	3032	2856	7555	4690	7247	3384	7398	2520	0.035454674	6.600602803	0.12969406	0.724370703	0.872106936
FBgn0070759	XR_group6	11679518	11684877	-;-;-;-;-;-;-;-;-;-;-	4345	2716	1539	1335	2086	822	1120	2368	1429	2066	1003	2691	819	0.024320179	4.93205088	0.042753964	0.839302785	0.928981908
FBgn0070760	3	12521290	12522565	+	1276	1469	1085	749	1318	392	588	1037	820	1148	411	1261	435	-0.258893167	4.01889939	4.284187149	0.058350555	0.232436833
FBgn0070762	XR_group6	11637580	11640233	-;-;-;-;-;-;-;-	1807	10034	4687	5926	7610	2440	3602	10322	5694	7387	3940	10457	4930	0.235447112	6.886234146	2.307231835	0.152045053	0.399484893
FBgn0070763	2	30239062	30241112	+;+;+;+	1352	4307	3806	2577	6059	1865	1733	5525	2948	4410	2104	5450	1389	0.022749619	5.975103365	0.033136474	0.858284891	0.937360961
FBgn0070764	XR_group6	11632534	11636774	-;-;-	3992	71	38	26	56	6	16	68	19	40	21	44	57	0.306811166	-0.426051307	0.407911006	0.533812628	0.762801639
FBgn0070765	4_group1	1624924	1626270	+;+;+	763	214	195	229	554	162	164	167	155	232	68	248	58	-0.932590317	1.932048687	10.57978736	0.006089215	0.06190279
FBgn0070766	3	12682877	12684121	+;+	1190	9915	7632	4036	7211	3331	3160	9347	4927	6187	2995	8605	2945	-0.086648389	6.72464455	0.685101954	0.422353716	0.67919731
FBgn0070767	2	24813111	24814890	-;-;-;-	1466	114	99	48	132	80	56	70	131	136	35	212	143	0.104937666	1.04659976	0.055912612	0.816658471	0.917730582
FBgn0070768	4_group1	4847298	4848214	+;+;+	666	14323	13083	8363	14625	5109	5409	14387	7379	10066	4800	12829	4881	-0.264899994	7.447518472	8.849516943	0.010463712	0.085141575
FBgn0070770	Unknown_group_139	16122	17121	-;-;-;-	733	31460	22318	13171	24648	10291	10664	25385	15312	17900	8755	28158	11390	-0.152760675	8.382089236	2.11832232	0.168605708	0.421715266
FBgn0070771	4_group1	651142	653556	-	2415	10	0	12	18	1	2	33	0	16	6	12	10	0.778198066	-2.232499983	0.738596003	0.405246357	0.666777741
FBgn0070772	2	24782157	24783755	-;-;-	1472	1204	1237	988	2085	612	667	1670	980	1541	725	1612	570	-0.031560799	4.413448041	0.047678186	0.830449063	0.924717001
FBgn0070773	4_group1	629377	684584	-;-;-;-	1374	1125	1668	492	1077	285	291	1343	959	1326	642	1194	513	0.285383406	4.028454916	1.439381773	0.25105357	0.522862137
FBgn0070775	4_group1	549099	553693	-;-;-;-;-;-;-	2718	7262	3015	3098	3565	1527	1399	2482	2056	2649	589	2918	746	-0.998528401	5.519834747	20.9542963	0.000490051	0.012944926
FBgn0070776	2	24217023	24217818	+	796	1116	770	680	859	783	362	986	617	779	381	975	361	-0.29547804	3.790304416	2.127374969	0.167761829	0.420822882
FBgn0070778	2	19432531	19435740	+;+;+;+;+	2618	12127	20160	10185	19073	11911	7036	22984	14778	17144	8771	24096	8143	0.079925326	8.108835	0.165753562	0.690507874	0.851367457
FBgn0070779	3	13169618	13175407	+;+;+;+;+	968	19	62	9	59	3	0	29	46	29	21	58	19	0.54674111	-0.857054003	0.603783233	0.450658542	0.701288531
FBgn0070780	4_group1	1626358	1627149	+;+	722	8262	5927	3154	4198	3442	5530	7662	3931	4657	2502	7014	2012	-0.253060616	6.537671196	1.273902013	0.279659927	0.55254203
FBgn0070782	3	17732599	17735200	-;-;-;-	2420	9350	8183	4227	7033	3435	4194	10289	5619	5259	4004	9871	3471	0.021284528	6.855512419	0.024478659	0.878009309	0.946234394
FBgn0070783	2	19439954	19442374	+;+;+;+	1657	3026	3310	1707	2804	1563	1485	5219	2832	3521	1621	4589	1554	0.321956336	5.665257969	5.755255105	0.031659501	0.165239193
FBgn0070784	4_group5	548849	555031	-;-;-;-	2265	694	509	526	711	295	252	857	706	785	358	1020	457	0.339300897	3.475851537	6.639707653	0.022578138	0.134525399
FBgn0070787	3	9148493	9152505	-;-;-;-	3506	1472	1346	746	1635	808	595	980	741	916	397	1089	397	-0.64384079	4.114646928	22.90075104	0.000328845	0.010276042
FBgn0070788	2	24873922	24878069	-;-;-;-;-;-;-;-	2861	4120	3414	2683	5304	1164	844	2322	2509	1985	708	3156	1455	-0.686238438	5.454901905	15.9323461	0.001455624	0.025714817
FBgn0070789	3	19350904	19353727	+;+;+;+	2612	10118	5921	4587	9310	2952	3583	10058	6777	7995	3557	10535	3771	0.160837759	6.892394529	3.37399162	0.088543271	0.295017019
FBgn0070790	Unknown_group_58	26637	40087	+;+;+;+;+;+;+	4669	0	3	4	32	0	2	4	14	15	9	10	2	0.614713801	-2.488600046	0.4071798	0.53417409	0.762801639
FBgn0070792	Unknown_group_58	47459	61060	+;+;+;+;+;+;+	10439	17922	4837	3928	9247	4621	2384	8442	7257	4530	823	6051	7369	-0.477518698	6.878986056	0.787178841	0.393473509	0.658869618
FBgn0070793	3	196600	210576	+;+;+;+;+;+;+	2806	20	4	22	12	4	4	4	8	6	4	16	28	-0.369393245	-1.962904961	0.256378285	0.620859625	0.817113664
FBgn0070795	2	10034189	10037174	-;-;-;-;-;-;-;-;-;-;-;-	2146	809	82	176	317	72	125	496	383	535	148	513	187	0.616078389	2.458867166	2.322814153	0.151003931	0.398042352
FBgn0070796	2	24886851	24892291	-;-;-;-;-;-;-;-;-	4342	6433	4732	3265	6489	2493	2656	7703	5079	5708	3212	7016	2515	0.218524831	6.454658486	7.797706485	0.014906541	0.104452464
FBgn0070797	4_group5	492170	500566	-;-;-;-;-	4204	8195	7124	5370	8775	3770	4139	10122	5786	8723	3537	8667	2667	-0.069996676	6.880491129	0.358056452	0.55958171	0.77871675
FBgn0070798	XL_group1e	6373315	6503197	+;+;+;+;+;+;+;+;+;+;+	5803	1422	556	739	1028	346	278	890	758	1053	264	1106	673	-0.071064823	3.786171174	0.119492873	0.734959896	0.877509696
FBgn0070800	3	19381520	19389764	+;+;+	4116	4129	2615	2435	4404	1549	1531	2877	1777	2566	1638	2815	968	-0.3998895	5.504043563	11.05435247	0.005290182	0.057395091
FBgn0070801	3	4993961	4995014	+;+;+	910	258	190	131	213	94	59	235	143	197	97	278	106	0.090273422	1.612950344	0.200748109	0.661286986	0.837128133
FBgn0070803	Unknown_group_14	24380	43818	-;-;-;-;-	5306	3494	2878	1254	4551	1840	1399	3638	3320	3792	2134	3954	1420	0.313257273	5.700596555	3.728066474	0.074973265	0.268568863
FBgn0070804	3	1330656	1384332	+;+;+;+;+;+;+;+	5435	415	180	210	341	121	164	342	186	258	175	390	72	-0.047958596	2.126475782	0.051258208	0.824310374	0.921678313
FBgn0070806	3	1404509	1406014	+	1506	60	74	40	84	28	43	39	107	55	19	122	138	0.028703014	0.478319729	0.003139801	0.956142924	0.979858424
FBgn0070807	2	10049793	10052020	-;-;-;-;-	1989	720	293	258	983	364	147	655	523	499	182	612	276	0.003882772	3.044664003	0.000184884	0.989351999	0.995279494
FBgn0070808	2	17332737	17337353	+;+;+;+;+;+;+;+;+	2821	1999	1237	978	2379	621	706	1303	1099	1483	756	1625	548	-0.202766192	4.480638069	2.193702198	0.161738434	0.412498345
FBgn0070809	XL_group1e	6511306	6514238	-;-;-;-;-	2641	2671	1080	1475	2713	1200	981	2002	1313	1774	816	2857	1307	-0.114785311	4.978169548	0.305263202	0.589712959	0.797965195
FBgn0070811	2	16998268	17047072	+;+;+;+;+;+;+	9431	1065	733	524	859	381	237	865	669	769	315	904	495	-0.006382795	3.581956308	0.001691655	0.967799911	0.985377975
FBgn0070812	XL_group1e	6523004	6524238	-;-	1152	364	83	270	280	72	187	551	189	335	141	294	176	0.274299964	2.191563836	0.615480699	0.446400199	0.698442498
FBgn0070813	4_group5	504447	509836	-;-;-;-;-;-;-;-	4898	19905	15785	10500	17740	6122	6531	19102	12381	16119	6517	18642	6907	-0.049648	7.873929529	0.411276313	0.532154965	0.7619185
FBgn0070814	3	17736913	17738990	-;-;-;-;-	1687	574	518	198	344	154	186	381	215	270	181	299	95	-0.436161103	2.38652762	4.355863415	0.056544407	0.228590065
FBgn0070815	XR_group6	2933967	2940176	-;-;-	2052	178	62	117	213	64	40	76	54	75	79	102	53	-0.461895126	0.833804106	1.750271364	0.208008361	0.471963355
FBgn0070816	3	1441732	1460460	+;+;+;+;+;+;+;+;+;+	5195	146	98	41	152	33	63	208	257	137	40	154	78	0.612159955	1.09206049	2.678310772	0.125018465	0.358410716
FBgn0070817	XL_group1e	1327280	1328238	-	959	267	145	221	231	105	131	263	185	364	111	360	137	0.11649176	1.981426967	0.258130066	0.619680296	0.816445252
FBgn0070818	XL_group1e	3250263	3314049	+;+;+;+;+;+;+;+;+	2057	25	25	12	31	6	6	50	15	50	18	6	14	0.612925974	-1.235860199	1.252291208	0.282803853	0.555511781
FBgn0070819	3	1549573	1553042	+;+;+;+;+;+;+;+	2589	2560	2124	1848	3515	1080	1459	3080	2271	2850	1395	3231	875	0.014474589	5.332877149	0.010314243	0.920612916	0.965253847
FBgn0070820	XR_group6	3018927	3020464	-;-	1433	269	210	141	230	112	111	314	139	138	106	177	76	-0.219850487	1.66494461	1.194443365	0.293722909	0.566204012
FBgn0070821	3	8621542	8622448	-;-	845	15744	11185	7738	13667	5204	6264	17071	9653	11352	6508	18260	6261	0.135176229	7.614400369	2.341126722	0.149292828	0.396002124
FBgn0070822	XL_group1e	1305026	1319670	+;+;+;+;+;+;+;+;+;+;+;+;+;+;+;+;+;+;+	5961	25440	21704	12800	19002	9454	10790	25764	20004	17264	10826	31265	13996	0.16707173	8.413418184	1.364367876	0.263175048	0.537138957
FBgn0070823	XR_group6	3011761	3013455	-;-;-;-	1578	289	302	245	434	178	155	325	244	435	216	419	106	0.023820239	2.391629473	0.012112298	0.913998731	0.962217716
FBgn0070824	2	26757752	26761909	-;-;-;-;-;-	1941	3502	3081	2174	3949	1261	1477	3520	2735	2570	1286	4541	1750	-0.050171968	5.602002934	0.213867631	0.651183615	0.832177153
FBgn0070826	3	1613502	1628655	+;+;+;+;+;+;+;+	3045	549	438	440	737	235	290	661	473	442	352	994	420	0.22816423	3.248910342	1.342105824	0.266923447	0.540135667
FBgn0070828	3	1631665	1633886	+;+	2168	2827	2195	1905	2593	1279	1213	2297	1680	2235	1083	2465	774	-0.313353399	5.137773331	6.770126412	0.021514975	0.130712196
FBgn0070829	3	1633945	1634821	+;+	810	319	50	102	126	87	41	156	82	65	31	109	75	-0.469274389	0.936514696	1.208893696	0.290941672	0.564070492
FBgn0070830	3	6702070	6704143	-;-;-;-;-;-	1572	1782	2201	1239	2805	916	843	1510	842	1327	488	1459	387	-0.853629924	4.579834223	29.98924554	9.60E-05	0.004793939
FBgn0070832	3	12395008	12396766	-;-;-;-	1602	2226	1304	1060	2143	829	582	1691	1053	1833	756	1760	561	-0.126183061	4.570739583	0.847171343	0.373651382	0.640924357
FBgn0070833	XR_group6	2998642	3008339	-;-;-;-;-	3049	432	369	340	342	125	182	485	545	447	267	697	479	0.582107656	2.927428158	7.502630521	0.016525313	0.111184809
FBgn0070834	XL_group1e	1303400	1304930	+;+;+	1399	267	55	43	139	75	26	76	94	100	40	137	151	0.065497761	0.942660314	0.013575987	0.908974368	0.959936331
FBgn0070835	2	21724064	21726336	-;-;-;-;-	2020	251	222	118	192	39	32	126	76	99	85	140	47	-0.454308588	1.09560091	1.853250562	0.195892323	0.456098692
FBgn0070836	XL_group1e	1301300	1302748	+;+;+	1331	556	392	226	410	181	229	485	276	479	150	404	122	-0.174510069	2.56786754	0.871242554	0.367151162	0.63424478
FBgn0070838	3	8617786	8619657	-;-;-;-;-	1631	3306	1924	1004	2850	893	863	2392	1282	1822	817	2249	528	-0.238307778	4.859784662	2.726940957	0.121932791	0.353708652
FBgn0070839	XL_group1e	1282330	1283279	+;+;+	832	484	384	284	497	108	145	392	197	319	87	276	183	-0.525391267	2.333313867	7.078954159	0.019222454	0.121847292
FBgn0070840	3	8603123	8617741	-;-;-;-;-;-;-;-	4212	199	111	68	119	98	47	364	365	334	128	308	196	1.349882367	1.874421959	22.46116975	0.000357841	0.010707169
FBgn0070841	XR_group6	3025179	3026021	+;+;+	693	2404	1716	1221	2398	895	778	2356	1433	2165	796	2674	1122	0.045326727	4.914891836	0.188065616	0.671441863	0.841624134
FBgn0070843	3	12393356	12395060	+;+;+;+;+	1442	22067	26576	14566	29706	10853	11930	28289	15502	18923	10100	26570	8629	-0.216659846	8.419892925	3.354694899	0.089364467	0.296542235
FBgn0070845	3	6690266	6693064	+;+;+;+	2562	2060	1835	1653	2796	1019	1153	3239	1990	3195	1291	3219	1166	0.2700848	5.242083714	4.641306947	0.049980105	0.211971645
FBgn0070846	4_group1	621253	626015	+;+;+	1881	54	50	190	134	69	41	48	257	295	29	272	142	0.114998368	1.36359426	0.054225323	0.819392019	0.919314666
FBgn0070850	4_group1	662035	672362	+;+;+;+;+;+;+;+;+;+	2890	108	468	1283	1993	942	1138	126	3784	2378	25	1954	1520	-1.003184644	4.745644742	0.466797133	0.509043679	0.745476128
FBgn0070851	Unknown_group_43	11393	24036	+;+;+;+;+;+;+;+;+;+	5125	9868	8950	5529	10861	4962	3984	10809	7792	9956	4852	11994	4322	0.087508307	7.176814418	0.82859518	0.378786085	0.645311591
FBgn0070852	4_group4	3068485	3071921	+;+;+;+;+	1958	8499	5209	3975	6381	2906	2528	8309	4698	5163	3050	8377	2728	0.071885714	6.546403787	0.553191845	0.469877196	0.715564479
FBgn0070853	2	21753439	21754368	-	930	9326	10728	6389	8896	3949	3683	14226	7708	9907	5166	13851	5301	0.255188118	7.241187998	4.635915689	0.05009542	0.212338075
FBgn0070854	XL_group1e	1284073	1285069	+;+;+	680	2165	1315	1683	2749	668	682	1762	2196	2977	474	2065	1410	-0.098622482	4.936700705	0.277870089	0.606731009	0.808479253
FBgn0070855	Unknown_group_43	33197	36789	+;+;+	2319	0	6	5	6	6	3	16	0	36	6	16	2	1.08807838	-2.398097408	1.275438525	0.278590588	0.551714797
FBgn0070856	Unknown_group_43	42705	84709	+;+;+;+;+;+;+;+;+;+;+	7211	260	206	154	276	104	84	579	531	346	194	480	249	1.055784389	2.415371097	30.10876758	9.42E-05	0.004768968
FBgn0070858	XL_group1e	1261389	1266149	+	4761	1707	835	510	883	484	819	1369	968	787	444	658	296	-0.180486659	3.936073303	0.573279937	0.46208486	0.711061883
FBgn0070859	XL_group1e	1220032	1221691	+;+;+	1525	1314	1046	615	1400	487	509	1405	1090	1057	464	1312	559	0.052730317	4.097077598	0.191372598	0.668755165	0.839990345
FBgn0070860	3	8606329	8607852	+;+;+	1385	32	2	10	8	12	5	1	3	13	0	17	8	-1.3529397	-2.272894848	1.525360733	0.238059438	0.506958956
FBgn0070861	2	21754646	21756238	-;-;-;-	1412	5485	4195	2325	3885	1603	2809	5186	3438	4246	2195	5338	2342	0.096131613	6.068049054	0.402145333	0.536675436	0.764927537
FBgn0070862	XL_group1e	811305	816977	+;+;+;+;+;+	1954	28	3	11	10	0	6	34	7	5	6	16	8	0.414836984	-2.111042686	0.315303742	0.583727295	0.794300867
FBgn0070863	XL_group3b	134975	136632	+;+	1603	29	31	83	19	21	17	42	74	127	12	55	54	0.178800995	-0.064121447	0.153381267	0.701491279	0.858113625
FBgn0070865	XL_group3b	124490	125808	+;+	1248	161	116	29	230	52	58	151	124	242	68	299	65	0.545244111	1.217544596	2.256428914	0.156290065	0.406271183
FBgn0070866	3	13364501	13365255	-;-	696	7616	8021	4219	5498	3486	3606	9363	6032	5200	3374	9999	4030	0.087997693	6.783539568	0.275202083	0.608445898	0.809760066
FBgn0070868	2	10990881	10994934	-;-;-;-;-;-;-;-;-	3000	2130	1987	1590	2588	740	297	3190	2232	2102	1192	3336	1336	0.472809837	5.08007242	4.367826119	0.056606289	0.228777263
FBgn0070870	3	19286270	19291334	+;+;+	1301	262	211	164	338	108	135	266	135	231	109	236	36	-0.369591657	1.768590313	2.199038303	0.16126576	0.412273319
FBgn0070871	XL_group3b	48976	106378	+;+;+;+;+;+;+;+;+;+;+;+	6376	1209	578	741	1045	409	364	1046	1001	963	398	1174	635	0.135482539	3.890206306	0.676817368	0.425104826	0.68098935
FBgn0070872	3	245645	246686	+;+	970	8563	6083	4089	8173	2500	3248	8745	4735	6320	2946	8179	3006	-0.014602283	6.644030658	0.027600662	0.870535425	0.942609392
FBgn0070873	3	8631424	8637082	+;+;+;+;+	2525	24	19	18	39	14	51	81	35	42	22	90	28	0.645493087	-0.386648742	1.580078205	0.23025052	0.498124602
FBgn0070874	XL_group3b	41271	42977	+;+;+;+	1452	5481	5585	3081	6105	1367	2380	7224	3799	4742	2654	6848	2883	0.172800535	6.297134288	1.398165725	0.257618636	0.530781286
FBgn0070875	XL_group1e	3480672	3483935	-;-;-;-	3066	982	739	542	893	274	397	853	769	920	401	1029	321	0.069434905	3.625972385	0.248579806	0.62617265	0.819223028
FBgn0070878	3	1718208	1719965	-;-;-	909	4	5	13	5	0	4	11	6	17	4	8	6	0.453483772	-2.588662703	0.449837245	0.513823981	0.748270093
FBgn0070879	3	1724912	1726079	-	1168	857	650	328	747	236	251	719	565	811	328	933	335	0.222114491	3.340211186	2.483510159	0.138387426	0.379763849
FBgn0070880	3	1729150	1730842	-;-	1628	1850	1604	940	1915	757	750	2247	1279	2194	838	2117	749	0.171372424	4.705945222	2.353755385	0.148283313	0.394107315
FBgn0070882	2	22082649	22086127	-;-;-;-	3311	14271	6659	5375	10407	1862	2718	9713	5707	7524	4086	9538	3238	0.010226092	6.876740065	0.002799386	0.958599455	0.981323141
FBgn0070883	XL_group1a	9023986	9026313	+;+	2269	809	542	537	957	288	327	772	576	779	274	963	213	-0.122391368	3.393611449	0.566660464	0.46462841	0.71288031
FBgn0070885	3	10310103	10311047	-	945	53	12	81	40	0	0	90	72	290	13	128	217	1.545712489	0.713975598	4.308543768	0.058558456	0.232759956
FBgn0070887	3	5513976	5515597	-;-	1564	6097	4926	3049	5847	2296	2485	6901	3656	3982	2382	5698	2075	-0.061309923	6.234822833	0.452836155	0.512447017	0.747195788
FBgn0070888	3	5494227	5510667	-;-;-;-;-;-;-;-;-;-;-;-;-;-;-;-;-	8551	8489	3917	2721	5158	2828	1797	4731	3569	4060	1548	4880	2018	-0.293565212	6.107357225	3.285543072	0.092383941	0.302057646
FBgn0070889	4_group1	3831940	3837702	+;+;+;+;+;+;+;+;+;+;+;+;+;+	3940	2350	2400	1098	3284	630	947	3979	2657	3485	1543	3462	1223	0.593194191	5.321304665	13.00843943	0.003056903	0.041341371
FBgn0070890	XR_group6	6882396	6884901	+;+;+	2387	1370	1594	763	1748	586	609	1500	1028	1328	796	1844	383	-0.012303594	4.356971143	0.005406593	0.942472669	0.974795499
FBgn0070891	3	9853438	9857100	-;-;-;-;-;-	1388	876	365	311	540	593	197	581	351	596	302	569	223	-0.088228867	3.144638197	0.108883932	0.746527817	0.883386069
FBgn0070892	4_group1	3840607	3843703	+;+;+;+	2936	63873	51392	30457	47576	20378	27480	66793	41330	38877	27519	75166	27409	0.130825796	9.640731052	0.945091371	0.348220119	0.616244893
FBgn0070893	XL_group1e	3406326	3414034	-;-;-;-;-;-;-	3067	33	227	15	80	126	13	64	29	62	66	95	23	-0.563412924	0.507427532	0.736828289	0.405890335	0.666969667
FBgn0070894	XL_group1e	621300	642252	+;+;+;+;+;+;+;+	7270	8	21	14	25	21	18	13	19	39	14	80	25	0.412080978	-0.965379528	0.435190959	0.520647146	0.753077077
FBgn0070895	3	8707413	8709282	-;-	1804	655	785	531	766	654	393	963	740	936	417	1116	292	0.032580738	3.71558871	0.020982783	0.886985226	0.950262748
FBgn0070896	3	14878537	14915193	+;+;+;+;+;+;+;+;+;+;+;+;+;+;+;+	7792	1646	1829	815	1123	673	655	226	284	144	168	255	107	-2.486504169	3.673278967	91.15865483	2.42E-07	7.55E-05
FBgn0070897	XL_group1a	3890343	3893004	-	2662	3671	2622	2034	3244	1226	1615	2702	1386	2565	1203	2904	803	-0.414906164	5.315942722	10.68169331	0.005906465	0.060875962
FBgn0070898	3	17729964	17732675	+;+;+;+	1927	1361	734	702	1335	355	379	1377	823	1191	443	1377	593	0.172275012	3.990525006	1.704010453	0.213766501	0.479674375
FBgn0070899	2	26749672	26755306	-;-;-;-	2677	156	139	64	56	25	21	59	97	228	10	171	84	-0.24796276	0.729112304	0.312282109	0.585515174	0.794995041
FBgn0070900	3	7814900	7818878	-;-;-	3126	1840	1154	1261	2359	626	619	2032	1802	1638	736	2368	1114	0.189749539	4.738631762	1.830150053	0.19852945	0.459193908
FBgn0070905	3	12752121	12752781	-;-	600	26	2	24	26	1	2	35	8	44	20	45	56	1.411126768	-1.002312294	3.841145478	0.071176083	0.260633357
FBgn0070907	4_group1	3853265	3869596	+;+	3090	651	315	414	854	99	1817	319	132	244	176	285	121	-1.735766802	3.353603114	6.913160061	0.022731243	0.135286677
FBgn0070908	3	6571607	6574333	-;-	2663	5057	4422	2228	4943	1896	1725	5174	3286	4225	1958	5092	1664	0.018883612	5.969170954	0.036597564	0.851159332	0.934373055
FBgn0070910	XL_group1e	9404503	9405313	-	811	3031	1317	1378	2149	1383	975	4077	1228	1703	757	2284	711	-0.047263283	4.978441363	0.054041568	0.819692419	0.919415194
FBgn0070911	4_group5	282402	283692	+;+;+;+	1115	14	20	13	51	29	17	217	135	95	42	171	76	2.203480728	0.440096214	22.90928713	0.000328309	0.010276042
FBgn0070912	3	6564282	6569386	-;-;-;-;-;-;-;-;-	4594	714	679	144	991	280	375	1374	732	1154	443	1109	397	0.755024614	3.638965326	8.537451627	0.011597524	0.090795752
FBgn0070913	XR_group8	412426	415138	-;-;-;-	2533	1913	1035	780	1600	562	555	1217	865	1004	992	1364	585	0.0536704	4.288500543	0.11260454	0.742401773	0.880964136
FBgn0070914	2	22021717	22024155	-;-;-;-	1058	4	265	911	1098	670	322	28	2961	1747	17	1105	1048	-0.680565284	4.108847872	0.156601259	0.700111165	0.857306377
FBgn0070915	XR_group8	408045	412040	-;-;-;-;-	2295	626	347	324	477	156	202	545	408	323	207	609	249	0.070193899	2.774744837	0.16919677	0.687339394	0.849999392
FBgn0070916	3	6482415	6484753	+;+;+;+	2123	3655	2316	1370	3113	962	1068	2580	2085	2265	1063	3110	1557	-0.003263696	5.253114058	0.000609317	0.980671098	0.991842602
FBgn0070917	XL_group1a	3065985	3087774	+;+;+;+;+;+;+;+;+;+;+;+;+;+;+	3045	136	144	95	174	23	51	127	99	126	61	157	91	0.044092573	0.993523794	0.025936025	0.874462997	0.944633572
FBgn0070918	XR_group6	4477347	4478087	-;-	682	943	926	525	1048	386	693	1185	652	1181	402	971	393	-0.069893289	3.85667652	0.132821661	0.721219498	0.869881807
FBgn0070919	XR_group6	4478407	4482608	+;+;+;+	2747	1957	1548	1060	1903	786	800	2097	1446	1628	798	2312	688	0.045699791	4.694522966	0.217092869	0.648758251	0.831078276
FBgn0070920	XR_group6	4524343	4528073	-;-;-;-	3552	520	414	244	438	102	253	384	337	275	167	403	164	-0.236857861	2.515838076	1.208891147	0.290942159	0.564070492
FBgn0070921	XR_group6	4542754	4544887	-;-	2059	12146	8516	6498	9976	4231	5520	10537	6788	5247	4451	11341	3944	-0.212011555	7.118263592	2.348026962	0.148740175	0.395035616
FBgn0070923	XR_group6	4378064	4379749	-;-;-	1556	7437	7526	4419	8399	3925	3613	7657	3933	5869	2572	6825	1590	-0.456440646	6.608955303	10.68664843	0.005897742	0.060875962
FBgn0070926	3	2791831	2793788	-;-	1892	710	494	430	886	324	226	765	559	699	221	730	262	-0.071806539	3.245531096	0.208060143	0.65560796	0.834466948
FBgn0070927	XR_group6	4371463	4372192	-;-;-	592	608	462	245	586	215	204	588	271	380	144	485	166	-0.279897261	2.699532314	3.098819649	0.101176299	0.318128088
FBgn0070928	2	22165897	22168373	-;-;-;-;-	2237	536	285	160	227	92	115	232	160	195	71	258	130	-0.500015571	1.886987154	3.981133368	0.066789412	0.250430455
FBgn0070930	XR_group6	4367930	4370474	-;-;-	2197	670	422	342	498	131	83	756	546	663	220	771	502	0.595793238	3.07297775	7.11404792	0.018980457	0.120844074
FBgn0070931	XL_group1e	10808112	10814963	+;+;+;+;+;+;+;+	4294	9478	9743	6085	11368	4447	5537	10681	6802	6964	5040	10843	4049	-0.137875095	7.159955471	1.28375487	0.277097787	0.550633905
FBgn0070932	4_group1	3613416	3619170	-;-;-;-;-	2591	5327	2123	2660	5501	1785	1406	4059	2545	3685	1708	4098	1478	-0.109469027	5.772504323	0.519055019	0.483642893	0.726676539
FBgn0070933	XR_group6	4370618	4371442	+;+;+	540	2002	1491	1325	2005	651	661	1838	973	1755	658	1841	478	-0.247636135	4.548246001	3.043761781	0.103960674	0.323173557
FBgn0070934	XR_group6	4372279	4373553	+;+;+	1155	766	579	310	477	283	216	638	363	477	202	587	346	-0.100034228	3.024343255	0.279612991	0.605616479	0.808425189
FBgn0070935	3	19337339	19338326	-	988	979	716	612	803	312	321	1040	552	763	346	853	447	-0.007697988	3.573543876	0.003379741	0.954499978	0.979315375
FBgn0070936	XR_group6	4377045	4378060	+;+;+	614	15653	9675	8224	14714	4784	4849	14043	8878	14674	4619	14099	4992	-0.042226606	7.47131703	0.172012639	0.684902366	0.848902308
FBgn0070938	3	19285815	19289099	-;-;-	2004	1131	987	545	837	306	470	1298	933	881	401	1268	659	0.218476506	3.900991247	1.795578059	0.202562104	0.465066379
FBgn0070939	XR_group6	5306031	5307911	+;+;+;+;+;+	990	25740	12802	11182	20283	6775	7467	16333	12300	19011	6116	20574	6990	-0.156013881	7.946583075	1.731840635	0.210278056	0.475150648
FBgn0070940	XR_group6	5308698	5310685	+;+;+	1887	1704	1194	856	2092	661	642	1584	1083	1586	721	1703	689	0.014814439	4.467303269	0.017258904	0.897435059	0.954100175
FBgn0070941	XR_group6	5310838	5311382	+;+	485	214	120	164	156	60	42	150	123	257	67	231	65	0.024437003	1.316380835	0.008417142	0.928260092	0.969332161
FBgn0070942	2	26734828	26745559	-;-;-;-;-	3260	1666	780	846	662	360	332	955	1181	1548	271	1437	915	0.10072407	4.067719899	0.168054234	0.688335039	0.850688633
FBgn0070943	XR_group6	5370822	5374804	+;+	3191	290	185	233	256	95	128	495	232	361	192	395	163	0.506527583	2.229177714	6.586766067	0.023027169	0.136317655
FBgn0070944	XR_group6	5426495	5428750	+;+	2184	4789	3396	2731	3701	2026	1966	4201	2659	2498	1626	4491	1537	-0.240543561	5.795812685	3.873665018	0.070127039	0.258340065
FBgn0070946	XL_group1e	7825804	7831206	+;+;+;+;+	2089	2712	1275	1326	2324	732	630	1741	1637	2014	746	2078	1128	-0.011374246	4.800202916	0.005564441	0.941640594	0.974795499
FBgn0070947	2	27023761	27024739	-;-;-	868	4541	3941	2827	4826	1785	1804	4368	2378	2333	1361	4127	1369	-0.426100349	5.761573967	14.47213153	0.00208616	0.032491437
FBgn0070948	2	22168868	22171148	-;-;-;-	1845	4741	3382	2265	4316	1089	1610	4425	3432	3822	1367	5464	2464	0.127820479	5.845382737	1.062028325	0.321023109	0.591502497
FBgn0070949	3	7684069	7692497	+;+;+;+;+;+;+	7620	7449	6290	4379	8771	3071	3381	6325	4705	5691	2636	6475	2019	-0.3515083	6.549915755	12.83319211	0.003204991	0.042714796
FBgn0070951	3	9430633	9432156	-;-;-;-	1283	46	21	10	80	3	18	56	45	48	34	34	34	0.82520605	-0.535758711	2.404149102	0.144338649	0.388908947
FBgn0070953	3	9413001	9416031	-;-	2670	786	670	545	1014	372	317	953	531	784	397	1111	301	0.025582898	3.561563056	0.034947163	0.854511384	0.935982084
FBgn0070954	3	14900698	14901339	-	642	8350	8085	4289	7539	3508	3068	11343	6033	6515	4035	10934	4137	0.221782771	6.891049879	3.503131583	0.083275914	0.28513764
FBgn0070955	3	9382648	9387186	-;-;-;-;-;-;-	1839	331	261	376	292	110	95	476	353	415	197	462	256	0.419688279	2.507340286	4.211958391	0.060240528	0.236754787
FBgn0070957	3	14836890	14837653	-;-	706	630	620	1677	1316	547	1343	926	611	830	479	961	370	-0.874401368	4.164438914	4.78103911	0.049567405	0.211013473
FBgn0070958	3	1708667	1711176	+;+;+;+;+	1549	32	63	112	97	60	71	115	168	59	12	142	88	-0.253835327	0.788621392	0.216405616	0.649273197	0.831149076
FBgn0070959	2	13155663	13158876	-;-	3105	1511	1862	1160	1855	600	640	1903	1077	1379	755	1767	462	-0.167942314	4.499931211	1.138057477	0.304935051	0.577762533
FBgn0070960	XR_group8	471639	474031	-;-;-;-;-	1938	1854	915	773	1643	551	502	2139	1149	1522	630	1801	1082	0.38141396	4.463510438	5.647187077	0.033040624	0.168867918
FBgn0070961	XR_group6	12754060	12757873	-;-;-;-;-;-;-;-;-	3265	10135	6400	3494	3541	2988	2119	6826	4364	7055	2966	7432	2122	0.041675887	6.481690167	0.038886717	0.846728325	0.932005681
FBgn0070962	XR_group6	12675038	12676853	-;-;-	1421	1250	590	630	1033	242	274	1130	802	1233	335	1209	411	0.2216747	3.732515451	1.59182827	0.228617774	0.496408818
FBgn0070963	2	26728452	26734504	-;-;-;-;-	2204	1405	1337	1062	2057	633	493	1500	1185	1840	647	1643	608	-0.033190074	4.4458345	0.055469746	0.817371673	0.91786358
FBgn0070965	3	8435973	8450617	+;+;+;+	3500	486	327	235	836	181	170	648	602	504	295	787	564	0.630109614	3.136185773	6.227547988	0.026365891	0.147070203
FBgn0070966	2	634251	634819	+	569	676	135	611	524	422	123	502	146	171	22	298	265	-1.231401503	2.655609833	4.168574872	0.064210542	0.245333047
FBgn0070969	2	197453	200263	-;-	2748	14	43	50	19	2	2	26	95	39	41	77	163	1.934102149	0.112170955	9.84778077	0.007612989	0.070821333
FBgn0070970	4_group5	1168166	1226875	-;-;-;-;-;-;-;-;-;-;-;-;-;-;-;-;-;-;-;-	9349	1812	481	576	513	218	281	1224	1265	631	298	1647	759	0.485387404	3.845929737	1.786645295	0.205175982	0.468285881
FBgn0070971	XR_group8	667487	669570	+;+;+;+	1342	116	128	50	79	29	23	51	37	51	44	58	30	-0.521957293	0.144364572	2.157831544	0.164961508	0.416901029
FBgn0070972	4_group5	545564	548372	+;+;+;+;+;+	1486	313	446	251	322	176	122	339	281	326	133	459	151	-0.164064769	2.362076409	0.728527544	0.408382412	0.668738153
FBgn0070973	4_group1	3872021	3885528	-;-;-;-;-;-;-;-;-;-;-;-;-;-;-;-;-;-;-	9922	1094	653	538	756	351	538	1120	529	774	483	1073	547	0.153928205	3.743797055	0.698468928	0.417973989	0.676337451
FBgn0070974	4_group1	3844941	3849667	-;-;-;-	3305	42	19	11	19	8	5	35	21	32	23	42	19	0.88557011	-1.138372837	4.234570488	0.059641113	0.235154101
FBgn0070975	4_group1	3827453	3831097	-;-;-;-;-;-;-	2792	4149	4017	2486	4652	1533	1923	3885	2320	3155	1522	3811	1620	-0.293142226	5.753687352	8.87685109	0.010370688	0.084797765
FBgn0070976	4_group1	3813820	3820957	-;-;-;-;-;-;-	1962	396	135	163	305	119	114	137	86	96	26	135	125	-1.214511859	1.531864952	11.03226759	0.005324559	0.057624767
FBgn0070977	4_group1	3785045	3810626	-;-;-;-;-;-;-;-;-;-;-;-	1890	533	383	196	677	66	208	346	845	237	199	493	1375	0.581857318	3.294574578	0.928761668	0.355066345	0.623310745
FBgn0070978	4_group5	483828	490545	-;-;-;-;-;-;-;-;-;-;-;-;-;-;-;-;-	3851	7329	6300	3621	6407	2993	2766	7856	4786	6352	2897	6839	2253	-0.014462733	6.522431937	0.0210982	0.886677163	0.950162869
FBgn0070979	4_group5	479958	480975	-	1018	1813	1457	972	3375	919	1109	2307	1335	1675	762	1759	511	-0.242696034	4.766764032	1.831856191	0.198333125	0.459058769
FBgn0070980	2	22115081	22135058	-;-;-	2662	390	570	198	23	46	222	717	291	464	256	570	219	0.629255419	2.610489505	1.173438641	0.300568706	0.573536921
FBgn0070981	4_group5	477838	479811	-;-;-;-;-	1719	79	23	0	43	14	2	96	36	39	31	50	28	1.389040732	-0.578056731	3.460718976	0.084963082	0.288654358
FBgn0070982	4_group5	475115	476881	-	1767	636	414	1094	2095	743	269	1031	1157	905	487	1526	968	0.039167778	4.184895602	0.009543961	0.923804823	0.966858222
FBgn0070983	2	4513189	4514107	+;+;+	781	12467	18586	4082	11041	4216	6549	18501	9095	10626	6087	16971	6229	0.169318364	7.554865167	0.478153113	0.50206398	0.741012328
FBgn0070984	2	4509037	4512113	-;-;-;-;-;-;-	1604	1225	520	556	861	266	235	714	452	564	166	703	272	-0.479614133	3.260456965	6.54906501	0.023353312	0.137297171
FBgn0070986	2	4425346	4428067	-;-;-;-	2548	1775	1927	6028	2599	781	803	2323	1246	1837	1376	1996	627	-0.640474511	5.248774306	2.096942299	0.174375496	0.428740768
FBgn0070988	XR_group8	670447	671885	+;+;+;+	1249	13116	10793	6526	10647	5315	5642	14835	8281	9525	5021	14276	5278	0.027561369	7.391725806	0.071692077	0.792972215	0.905839847
FBgn0070989	2	4324184	4326521	-;-	1945	0	13	24	2	0	17	8	11	74	5	37	13	0.426998987	-1.484412576	0.175534472	0.681887332	0.847208073
FBgn0070990	XR_group8	2452451	2453262	-	812	243	111	74	181	71	45	151	117	235	94	192	40	0.260204726	1.218103948	0.80739298	0.384777541	0.650988105
FBgn0070992	XR_group8	2509751	2511691	+;+;+;+	1665	1874	694	935	1418	465	399	1080	1176	1488	342	1334	982	-0.057638297	4.221359034	0.065095078	0.802496963	0.910890256
FBgn0070993	XR_group8	2522197	2528892	+;+;+;+;+;+;+;+	4638	44	5	15	6	5	22	43	23	16	5	19	58	0.480327525	-1.068583074	0.299022454	0.59349923	0.800924754
FBgn0070995	XR_group6	6436394	6438892	-;-;-	2367	1355	1288	607	1362	936	626	2115	1399	1675	837	2141	716	0.446881119	4.548061745	7.366467463	0.01734089	0.114362664
FBgn0070997	XR_group6	3083524	3095808	+;+;+;+;+;+	6402	3447	994	1260	1615	586	454	1207	1394	1391	502	1525	1158	-0.258154942	4.55567623	0.825106335	0.380410841	0.646704558
FBgn0070998	XR_group8	2635794	2641293	+;+;+;+;+;+	3291	121	76	57	162	48	28	95	84	65	87	69	64	0.185022689	0.643866663	0.281500979	0.604414232	0.807750285
FBgn0070999	XL_group1e	7933323	7982321	-;-;-;-;-;-;-;-;-	2411	1200	553	732	1152	357	290	831	1134	1149	512	1277	768	0.345612085	3.956637966	2.8718403	0.113277107	0.339543815
FBgn0071001	XR_group8	2642314	2654765	+;+;+	3199	2703	1527	895	2343	832	590	1482	1084	1673	1292	1746	763	0.045985672	4.707136196	0.0641101	0.803962737	0.911335237
FBgn0071002	XR_group6	6420638	6433241	-;-;-;-	2585	34	13	3	50	5	8	71	37	59	19	58	52	1.545255366	-0.622908015	7.395055248	0.017165833	0.113667533
FBgn0071003	Unknown_group_497	13833	19601	-;-;-;-	3862	1334	645	223	1269	441	296	784	673	1019	485	1236	377	0.305482	3.704883877	1.516151311	0.239407961	0.508495269
FBgn0071004	XR_group8	403670	408343	+;+;+;+	2026	5521	3767	3056	5117	1802	2171	4441	3039	4042	1787	4765	1777	-0.207863024	5.979803283	6.275532196	0.025888585	0.14573616
FBgn0071006	XL_group1e	11481894	11484187	+	2294	16950	14321	8859	13752	5779	7619	16787	9418	8362	7436	17748	6433	-0.072864846	7.69623172	0.255810375	0.62124305	0.817113664
FBgn0071007	2	20005043	20006514	+;+;+;+	1282	26012	17408	12041	19464	8286	9272	20532	12751	14531	8242	18931	7908	-0.19973176	8.075933716	5.330304655	0.037518432	0.180785174
FBgn0071008	XR_group8	387640	389871	+;+;+	1988	275	66	66	123	26	44	116	130	130	51	151	54	0.163426638	0.862621268	0.209873817	0.654218222	0.833547029
FBgn0071009	4_group2	69522	73857	-;-;-;-;-	3491	1132	845	809	1117	382	342	1054	807	1049	388	1327	556	-0.003722475	3.898683029	0.001142078	0.973539878	0.988139612
FBgn0071010	4_group2	64421	68385	-;-;-	1424	4229	2589	1574	3112	1357	1141	3075	1838	2487	926	3126	1238	-0.221444545	5.322900172	3.498347675	0.083464184	0.285410587
FBgn0071011	4_group2	60062	62469	-;-	2315	12842	8456	5352	9367	4204	4800	10276	5921	5769	3744	11578	4247	-0.17590845	7.051621368	1.899203511	0.190778622	0.448745296
FBgn0071012	2	1599206	1605040	+;+;+	5710	1997	1438	1047	2016	663	779	1969	1281	1969	695	2007	493	-0.039144293	4.606976351	0.08114088	0.78011868	0.899693997
FBgn0071013	4_group2	26285	33978	-;-;-;-;-;-;-;-;-;-;-;-	6452	7374	5152	2600	5633	2470	2034	5743	3750	4912	2104	5744	1871	-0.104060293	6.207315369	0.891006255	0.361938987	0.629088509
FBgn0071014	4_group2	21633	23581	-;-;-;-	1758	2792	1489	1171	2277	733	590	2377	1579	2138	875	2228	859	0.131462343	4.822212809	1.025090908	0.329274645	0.598892471
FBgn0071015	XL_group1a	5042705	5044290	-;-	1521	1937	1240	1337	2430	566	682	1349	1311	1357	406	1663	688	-0.469996682	4.491159897	11.44756787	0.00471913	0.054021715
FBgn0071016	XL_group1a	5032507	5033250	-	744	7456	5856	3807	6280	2800	3443	8600	4766	4817	3537	8292	3788	0.140654041	6.633312397	1.126781341	0.307248566	0.58016967
FBgn0071017	2	19966850	19968070	+	1221	9365	7096	4863	8571	3710	3643	9197	5017	5855	3594	8390	3146	-0.137920361	6.801190044	2.825509496	0.115960313	0.344062449
FBgn0071018	XL_group1a	5015224	5020626	-;-;-	2685	16	10	4	12	0	12	20	38	56	6	22	1	1.112736649	-1.618736592	1.602652916	0.227127048	0.495056464
FBgn0071019	XL_group1a	5004093	5005752	-;-	1591	20	49	1	54	2	8	143	34	75	28	107	19	1.586918587	-0.374916723	5.683266736	0.032571787	0.167500645
FBgn0071024	3	7595664	7597223	+	1560	95	183	22	16	47	60	113	75	57	12	82	47	-0.479174213	0.387432291	0.620184098	0.444706553	0.697560746
FBgn0071025	XR_group6	11860919	11863200	+;+;+;+;+;+;+;+;+	1616	172	124	116	107	12	15	70	47	24	23	89	135	-0.541682051	0.588620399	1.047779301	0.324171003	0.594150057
FBgn0071026	3	7600474	7601511	+;+	623	76	581	2199	6260	1218	954	71	7533	4651	104	2242	3422	-0.961195952	5.589210865	0.427325834	0.527409698	0.758380371
FBgn0071029	XR_group8	8189637	8191425	-;-;-;-	1614	2666	1608	1573	2022	796	800	1307	1053	1300	485	1581	528	-0.751866877	4.581355923	41.98447584	1.80E-05	0.001585221
FBgn0071031	XL_group1a	4985901	4986896	+	996	164	84	101	190	36	41	160	94	217	43	211	37	0.09266357	0.99065335	0.087294014	0.772181206	0.895819296
FBgn0071032	XR_group8	8184015	8189526	-;-;-;-;-	3682	263	253	126	323	131	93	373	315	325	172	462	100	0.497630954	2.146520746	5.933898703	0.029522292	0.158249901
FBgn0071033	XR_group6	11853612	11856170	+;+;+;+	1754	805	560	449	700	269	185	527	586	687	216	689	343	-0.11210889	3.198521482	0.510694954	0.487120346	0.728770145
FBgn0071034	3	16618496	16619174	+	679	300	151	52	203	30	95	320	244	518	99	434	282	1.073636651	2.037804017	7.771689225	0.015041598	0.105200553
FBgn0071035	XR_group8	223181	224860	+	1680	1935	1613	1556	4352	1572	1720	1978	869	1422	745	2041	571	-0.844939614	5.015539863	14.8429928	0.001911025	0.030471142
FBgn0071036	XL_group1a	4954890	4957786	+;+;+	2781	568	324	203	543	145	160	564	261	398	200	484	82	0.040466543	2.515357924	0.03819436	0.847990128	0.932750788
FBgn0071037	XL_group1a	4906884	4946621	+;+;+;+	4605	2003	1114	1226	2062	750	586	1703	1384	1505	884	1672	716	0.010429824	4.591262048	0.005462316	0.942177552	0.974795499
FBgn0071038	3	18585680	18590236	+;+;+;+	1278	34	13	2	13	14	2	16	4	8	4	5	2	-0.640088028	-2.253439975	0.979340863	0.339921549	0.609204123
FBgn0071039	2	30138229	30141226	-;-;-	2872	113	100	400	308	48	12	160	150	323	101	285	127	0.160179233	1.730417267	0.1189413	0.735618574	0.877640709
FBgn0071040	XL_group1a	4824347	4836420	+;+;+	4823	52	2	8	12	10	0	26	13	13	20	28	6	0.815279791	-1.659196207	1.202993701	0.292072825	0.564851457
FBgn0071042	XL_group1a	4817691	4820770	-;-;-;-;-	2747	9061	8076	4880	8123	3282	3618	11511	5087	6998	4097	8849	3675	0.053460749	6.884293363	0.240096051	0.632073393	0.822182439
FBgn0071044	3	17254662	17258109	-;-;-;-;-;-	3143	9616	8529	5624	9911	3781	4608	10646	6077	7402	4061	9926	3997	-0.08830225	7.022599305	0.919909935	0.354510874	0.622438877
FBgn0071045	XL_group1a	4812879	4814584	-;-;-;-	1162	56	178	137	201	12	34	124	254	332	37	309	441	0.694979045	1.819292615	4.627880462	0.050267873	0.212578245
FBgn0071046	3	17251630	17254397	-;-;-;-	2596	2253	1365	990	2155	690	585	1933	1300	1992	780	2072	561	0.059898609	4.62080969	0.194536536	0.666210692	0.838677909
FBgn0071048	XL_group1a	4811690	4816074	+;+;+	2233	1018	1237	587	1160	413	690	1577	819	847	591	1423	363	0.029087731	4.041833476	0.025576237	0.875328775	0.944873859
FBgn0071049	3	4858621	4859491	-;-	811	913	937	367	1148	296	686	879	619	1127	387	710	310	-0.16534463	3.70146954	0.432324057	0.522002242	0.754205267
FBgn0071050	XL_group1a	4803274	4804380	+;+	1045	66	96	29	70	34	26	48	26	23	16	29	13	-1.082872925	-0.376568979	8.965069735	0.010076951	0.083239698
FBgn0071051	2	15993168	15995771	+;+;+;+;+	855	37	46	33	3959	69	27	100	51	62	25	52	25	-3.273272555	2.378104212	5.383276901	0.040953368	0.188967047
FBgn0071052	2	15991828	15992493	+;+;+	554	8	9	0	13	0	3	21	7	24	13	3	11	1.567814871	-2.254028997	3.428789963	0.086260456	0.290375273
FBgn0071054	XR_group8	134643	136233	+	1591	2079	1811	1081	1504	525	751	1114	808	665	352	1170	560	-0.853392262	4.253871755	27.58329232	0.000142141	0.006033594
FBgn0071055	XR_group8	67447	133335	+;+	1807	1360	514	1196	1018	170	112	474	282	418	98	315	402	-1.270288768	3.258700656	11.68490111	0.004763726	0.05427839
FBgn0071056	XL_group1a	3586811	3591024	+;+;+;+	4014	1939	1188	931	1677	522	635	1782	1237	1776	1050	1884	563	0.283861313	4.528846084	4.302124069	0.057892206	0.23146943
FBgn0071059	XL_group1e	3131398	3133433	+	2036	417	442	375	545	217	194	510	403	543	220	486	210	-0.035015292	2.83262362	0.049829855	0.826731631	0.922551268
FBgn0071061	XR_group8	126280	127688	+	1409	259	117	155	252	54	57	170	137	121	61	152	78	-0.34259179	1.29208637	1.84456235	0.196878848	0.457452877
FBgn0071062	XR_group8	119587	122046	-	2460	39	28	71	35	15	36	131	60	52	44	57	161	0.988700569	0.413254903	3.360149852	0.089131395	0.295954241
FBgn0071063	XL_group1a	57625	58879	+	1255	11203	6952	5186	8917	3556	3881	11103	7320	8347	4105	11497	5064	0.188807273	7.056835975	4.256856005	0.059057293	0.233478994
FBgn0071064	2	26344000	26345014	-	1015	326	187	141	422	89	127	332	226	297	112	270	43	-0.040809782	1.91652471	0.021610024	0.885321317	0.949657769
FBgn0071065	XL_group1a	4760680	4765209	-;-;-;-;-	4080	3140	2044	1600	2812	899	1080	2215	2027	2481	812	2697	1456	-0.131378724	5.154542828	1.228183445	0.287285282	0.560485221
FBgn0071067	4_group2	46810	52373	+;+	2542	756	535	228	555	144	205	876	624	658	292	898	442	0.628619073	3.215708042	11.03358069	0.005322508	0.057624767
FBgn0071069	4_group2	170742	171740	+	999	4619	2083	2018	4279	1811	1480	3106	1869	1897	957	2737	1230	-0.500721562	5.429514216	11.90197707	0.004145946	0.050384735
FBgn0071070	4_group3	1700282	1700982	-;-;-	451	1934	1483	1106	2093	720	657	1774	1056	1536	525	1582	565	-0.315533844	4.495629548	8.360198628	0.012304969	0.093979759
FBgn0071071	XR_group6	1305376	1308001	-;-;-;-;-	2303	374	313	207	545	240	111	376	221	316	219	341	111	-0.135013642	2.393667484	0.405615745	0.534948815	0.763610968
FBgn0071072	XR_group6	12470150	12473992	+;+;+	1959	1188	1060	489	1574	592	577	1227	985	897	537	1537	842	0.112704109	4.175924054	0.303281806	0.590909503	0.799072222
FBgn0071075	2	15814599	15822626	-;-;-;-;-	4381	107	46	110	55	22	26	38	41	54	5	56	61	-1.136781499	0.040820137	7.209743612	0.018338431	0.11842087
FBgn0071077	XR_group8	492119	496397	-;-;-;-;-;-;-	3892	4607	2855	2249	3619	1088	1515	4162	2915	3945	1314	4266	1556	0.05924872	5.665958741	0.278191238	0.606525306	0.808425189
FBgn0071078	XL_group1a	8140516	8149735	-;-;-;-;-;-;-;-;-	3169	118	52	124	172	57	50	136	117	119	94	184	77	0.292295119	1.067589296	0.895347578	0.360808742	0.62822365
FBgn0071079	3	15533909	15535787	-;-;-;-;-	1571	1108	877	738	1208	422	512	740	598	660	270	653	235	-0.756839692	3.636005525	29.60824115	0.000101967	0.004991962
FBgn0071080	3	15532360	15533866	-	1507	12179	11092	5480	9684	3811	4474	10553	6631	6326	4692	11130	4746	-0.103733874	7.127825804	0.573029807	0.462180548	0.711061883
FBgn0071081	2	15796743	15799000	-;-;-;-;-	1608	38	28	8	40	94	16	39	14	16	9	62	16	-0.365229655	-0.553480139	0.236044919	0.634937303	0.823647513
FBgn0071082	3	2043064	2045373	+;+	2254	329	140	138	236	57	56	143	137	182	93	245	78	-0.089704935	1.455374595	0.120749599	0.73362844	0.876291798
FBgn0071083	XR_group8	3931859	3945192	+;+;+;+;+;+;+;+;+;+;+;+;+;+;+	3191	26735	17214	15601	21651	9575	10534	17890	10892	12182	6921	17468	7428	-0.5697387	8.085963403	31.34187958	7.77E-05	0.004150036
FBgn0071084	4_group1	4419431	4420601	-;-;-	937	1824	1190	788	2022	722	652	1372	831	1227	532	1332	404	-0.36850499	4.283265663	9.996518006	0.007270515	0.068936123
FBgn0071085	XR_group8	4076579	4081536	+;+;+;+;+;+;+;+	3548	9456	5995	1832	6049	3274	1483	3582	2732	1859	1414	3358	1385	-0.837661893	5.987089806	11.01383855	0.005720052	0.059921827
FBgn0071086	4_group1	4413055	4415869	-;-;-	2653	1200	996	833	1500	653	604	1665	1142	1336	669	1765	674	0.203322662	4.340581864	2.805659069	0.117133723	0.346100484
FBgn0071088	XR_group8	4007212	4018459	+;+;+;+;+;+;+;+;+	5737	2743	1396	1335	2618	812	925	1851	1472	1910	850	2021	719	-0.190828166	4.822117778	2.475901825	0.138944599	0.380439845
FBgn0071089	XR_group8	4021862	4023468	+	1607	355	336	266	535	196	226	357	312	273	156	379	89	-0.407152271	2.445956777	3.966376896	0.067236268	0.251656234
FBgn0071090	2	1523299	1529988	+;+;+;+;+;+;+	2283	53	0	0	0	0	10	24	42	9	14	45	0	2.592119412	-1.656177589	2.77236312	0.119443653	0.350100894
FBgn0071092	2	2179458	2180021	-;-;-	448	7977	3846	3521	5460	1419	1852	6169	4016	5159	1562	6424	3106	0.006016305	6.219819028	0.001415833	0.970540281	0.986912036
FBgn0071093	2	2031029	2031676	-	648	1788	2379	631	2632	608	1190	3923	2844	2232	1106	5216	1993	0.771667738	5.312286383	7.605015151	0.016789849	0.112189498
FBgn0071094	2	22909828	22926273	+;+;+	3231	139	46	67	96	47	23	64	118	104	11	105	82	-0.267884689	0.51340327	0.335580947	0.572016156	0.786288599
FBgn0071095	2	930440	932253	+;+	1705	2502	1109	538	1421	455	464	1022	843	1159	499	1279	489	-0.190282849	4.110689972	0.897530383	0.360242425	0.627734618
FBgn0071096	XR_group8	3313534	3321642	-;-;-;-;-;-;-;-;-;-;-	6359	11515	8980	6701	11175	4395	3906	10389	6492	7486	4118	9126	3581	-0.242605696	7.071997003	8.364353111	0.012287823	0.093979759
FBgn0071097	3	7791687	7793180	+	1494	890	698	553	811	417	169	736	424	754	292	714	241	-0.271777781	3.345596429	1.789995153	0.203223191	0.466074174
FBgn0071102	2	8389684	8394785	+;+;+	4909	2347	1355	1037	2614	825	864	1948	1446	1937	855	2018	609	-0.053624918	4.749803069	0.184652037	0.674245044	0.843142201
FBgn0071103	2	8375886	8377026	+;+	983	32947	15178	14868	28385	9072	9788	27079	19189	26642	10528	30998	10223	0.115844964	8.452103707	1.034349133	0.327178317	0.596875462
FBgn0071104	XR_group8	6336925	6337826	-	902	494	469	348	622	178	168	449	306	389	237	541	203	-0.138588273	2.755705231	0.773961497	0.394521215	0.659646299
FBgn0071105	2	8358829	8373400	+;+;+;+;+;+;+;+	4324	34972	17897	19137	31258	10456	9560	34478	26048	30934	12552	37573	19168	0.29050621	8.754573132	5.837846461	0.030649585	0.161757431
FBgn0071106	XR_group8	1266455	1273108	+;+;+;+	3378	23037	18294	13261	20799	9145	10136	20287	12558	12777	7876	20273	7668	-0.310550627	8.096364302	10.3834487	0.006460114	0.06361768
FBgn0071107	4_group5	1907787	1915588	+;+;+;+;+	6890	514	127	148	294	67	39	503	299	322	94	427	157	0.60809725	2.0731966	3.006963875	0.105873695	0.326399445
FBgn0071108	XR_group6	2528812	2530121	+	1310	16	24	9	25	26	4	54	9	20	4	4	12	-0.148096321	-1.48533794	0.044261508	0.83653795	0.927712742
FBgn0071110	Unknown_group_78	67654	77144	+;+;+;+;+;+;+;+;+;+;+;+;+;+;+	4843	2982	1359	1243	2268	675	612	1487	848	1096	596	1417	591	-0.570632493	4.495776677	14.86464588	0.001890046	0.030471026
FBgn0071112	XR_group8	3988044	4001759	-;-;-;-;-;-;-;-;-;-;-	4871	11728	9367	6676	7504	4741	5389	12172	8702	8716	4227	12584	6083	0.043189568	7.26879295	0.07977943	0.78191878	0.900443599
FBgn0071113	2	8351839	8352568	+	730	449	191	145	263	162	126	429	225	306	113	226	120	0.084853009	2.078539531	0.141123726	0.713055116	0.866420521
FBgn0071114	2	15730801	15733520	-;-	1038	10	6	3	15	6	8	8	4	23	0	16	10	-0.287838875	-2.301356109	0.102431402	0.753874238	0.887591533
FBgn0071115	3	7767441	7775189	+;+;+;+	1758	39099	27472	22282	44708	17205	19515	45801	26679	23675	18493	52673	21016	0.083686556	9.124835848	0.30220014	0.591564886	0.799513525
FBgn0071116	2	15714598	15716291	-;-;-	1508	366	234	116	219	92	87	143	51	124	74	144	59	-0.835351501	1.386201412	10.76374559	0.005763927	0.060166876
FBgn0071117	2	16617176	16621149	+;+;+;+;+;+	1576	154	174	251	146	55	35	127	176	154	69	214	108	-0.116971408	1.410873338	0.178255717	0.679582158	0.845976862
FBgn0071118	4_group1	4319643	4320563	-	921	614	476	448	797	300	318	1074	555	688	358	822	321	0.257580729	3.382056288	3.293140965	0.092046213	0.301640781
FBgn0071119	XL_group1a	6179522	6185683	-;-;-;-;-	2353	201	43	40	79	20	11	381	203	303	164	209	99	2.066407313	1.383497637	26.6006281	0.000168044	0.006670447
FBgn0071122	4_group1	4300950	4301736	-;-	726	12525	11482	6270	12795	5511	5271	16667	8434	10436	5403	15720	5756	0.116633363	7.465623743	1.303156436	0.273657279	0.546681781
FBgn0071123	2	16549293	16550183	-;-;-	782	1693	548	878	796	602	181	681	540	725	263	829	217	-0.659977481	3.588962662	4.723232029	0.048678544	0.208530111
FBgn0071124	4_group5	2076294	2085033	-;-;-;-;-;-;-	2997	8738	2940	2842	6950	2559	1942	5651	8527	4821	2047	9179	4198	0.3366291	6.511873134	1.400705693	0.259020878	0.531855493
FBgn0071131	XR_group8	7155110	7156263	+	1154	653	364	379	598	276	191	494	434	410	170	581	236	-0.224157007	2.883215988	1.760123446	0.206808104	0.470402761
FBgn0071135	XR_group8	2295046	2295886	-	841	637	474	179	760	212	323	697	424	532	338	656	274	0.279436453	3.08371721	2.232815771	0.158313643	0.408710226
FBgn0071138	XR_group8	8419547	8420281	-;-	673	550	359	296	437	169	184	440	310	524	179	367	174	-0.094998992	2.615556613	0.326244474	0.577347723	0.790040624
FBgn0071139	XR_group8	8339768	8340313	-	546	846	450	346	768	163	177	441	525	555	140	492	324	-0.275508518	2.962458306	1.622138106	0.224475594	0.491923762
FBgn0071140	XR_group6	6431709	6432381	+	673	33435	27739	18708	29676	12774	13180	43860	23289	28351	15856	35219	13557	0.160317155	8.820245914	3.137950438	0.09925239	0.314818705
FBgn0071143	XR_group8	671830	675328	-;-;-;-;-;-;-;-	1930	2135	1480	1427	1912	798	741	1943	1348	1940	650	1912	778	-0.160725245	4.705102042	2.223469252	0.159123683	0.410080633
FBgn0071144	XL_group1a	2484910	2487430	+;+;+;+;+;+	1711	10049	11487	4346	9915	4383	4342	13364	8374	8901	5247	15165	6236	0.292476158	7.288034008	3.670052268	0.07701556	0.272904486
FBgn0071146	2	5776689	5778022	-;-;-	1221	2662	785	1362	1272	477	533	1053	903	1419	59	2073	528	-0.843826052	4.238753398	3.339037171	0.093206904	0.303397563
FBgn0071147	4_group1	4311322	4312818	+;+	1418	813	826	586	1279	285	277	897	487	786	261	807	216	-0.365615385	3.461181018	4.088787237	0.063634608	0.243780783
FBgn0071148	4_group1	4320604	4322616	+;+	1949	612	413	329	651	184	261	699	426	693	271	631	187	0.164429969	3.010365633	1.065979531	0.320157889	0.590649279
FBgn0071149	4_group1	4359581	4360940	+;+;+;+;+	1129	1469	1933	458	1431	947	527	744	442	863	247	784	256	-1.151209091	3.968872359	18.07388809	0.000896095	0.019325912
FBgn0071152	2	21617070	21618569	-;-;-;-;-	981	2283	2215	1265	2626	1179	1103	2924	1973	2549	902	3050	1155	0.067016605	5.150878605	0.298735393	0.593674636	0.800964485
FBgn0071153	XR_group8	4334513	4335232	+	720	536	549	185	555	152	143	324	150	204	131	361	100	-0.728285776	2.322537692	10.75103023	0.005785752	0.060215971
FBgn0071154	XR_group8	7063594	7104355	-;-;-;-;-;-	4661	126	90	94	125	26	17	179	185	153	86	194	95	0.897405605	1.077695081	9.265532629	0.009146582	0.078794004
FBgn0071155	4_group1	4415948	4419446	+;+;+;+;+	1271	55	19	36	14	23	14	38	17	30	17	10	7	-0.530036792	-1.045319342	1.046663012	0.324419463	0.594404771
FBgn0071156	XR_group8	7045372	7047910	-	2539	0	10	0	0	2	4	40	16	7	22	83	22	3.276220383	-1.524685933	10.45827968	0.006315745	0.062887698
FBgn0071159	XR_group8	4317830	4333757	+;+;+;+;+;+;+;+;+;+;+;+;+;+;+;+;+	6997	4993	3716	3679	6389	1939	2398	4633	3097	3588	2158	4791	1655	-0.288767211	6.056327437	5.97788632	0.029022337	0.156825262
FBgn0071161	2	29715035	29717143	+;+;+;+;+;+;+	1745	12	161	1	45	12	24	314	186	277	159	286	132	2.370394642	1.321368106	10.82119786	0.006247121	0.062714604
FBgn0071162	4_group1	1081359	1118354	-;-;-;-;-;-;-;-;-;-;-	3403	3770	4127	2280	3238	1541	1413	5760	3203	4834	1925	4569	1958	0.308264264	5.875984145	5.788089439	0.031253394	0.163876685
FBgn0071163	4_group1	1285862	1288658	-	2797	9099	5891	4473	8837	3618	3164	7841	4477	4584	2784	8480	3603	-0.202935024	6.681717154	2.653101679	0.126655845	0.361343121
FBgn0071164	2	21597958	21598595	-;-	572	1871	1563	848	1221	390	605	1561	883	1203	633	1359	382	-0.160337087	4.226321014	0.816734917	0.382120125	0.64873405
FBgn0071165	4_group1	1148259	1150199	-	1941	4180	2415	1702	3422	1124	2318	1938	1314	1204	804	2003	585	-0.980347503	5.17104764	34.20102634	5.08E-05	0.00308312
FBgn0071168	XR_group6	4068351	4069469	-;-;-	999	2	10	24	15	0	0	131	16	72	0	469	6	3.205525844	-0.132328089	8.273529369	0.013490289	0.099094425
FBgn0071169	XL_group1a	5237570	5255680	+;+;+;+;+;+	2500	633	343	337	432	294	311	584	372	467	208	476	138	-0.195078118	2.858450116	1.013988911	0.33181385	0.600686393
FBgn0071171	XL_group3a	2680183	2681951	+;+	1421	9850	2880	3813	6102	1398	1991	4500	4339	5794	1082	6973	2490	-0.269725644	6.205982844	1.075890472	0.319183423	0.589915605
FBgn0071172	2	17760848	17777125	-;-;-;-;-	2708	3457	4014	1555	3442	1679	954	3622	2649	2560	1799	3663	2063	0.128896219	5.618163641	0.429336456	0.52342134	0.755197367
FBgn0071175	XR_group6	10020138	10022865	+;+;+;+	2119	2975	2293	1622	3395	1023	1458	2257	1657	1985	829	2444	1088	-0.425067232	5.149287695	13.90289452	0.002413877	0.035554471
FBgn0071176	XL_group1e	12303851	12305908	+;+;+	1539	1928	995	840	1847	629	550	1578	1109	1263	861	1439	497	0.060347987	4.367584211	0.226172834	0.642047109	0.827656391
FBgn0071177	XL_group1e	12306217	12308065	+;+	1787	527	235	292	552	126	172	399	303	385	123	472	254	-0.118230425	2.543580171	0.339659319	0.569718617	0.785087008
FBgn0071178	2	11338225	11339369	-;-	1078	24077	14416	8869	16410	7866	7474	17085	9043	11863	5489	15821	4615	-0.363857096	7.749096871	13.19875495	0.00290496	0.040174137
FBgn0071179	XR_group6	10008520	10016748	+;+;+;+;+;+	2433	833	573	195	852	331	218	626	753	702	287	1065	601	0.399984431	3.437621077	1.990918588	0.181072194	0.436996242
FBgn0071181	XR_group6	10062563	10064953	+;+;+	2280	681	313	361	543	190	152	390	351	360	171	558	232	-0.199577935	2.710882955	1.209813385	0.290765892	0.564070492
FBgn0071182	XR_group8	4765555	4780069	+;+;+;+;+;+;+;+;+;+;+;+;+;+;+	4898	26776	14544	13593	21342	7554	9765	19585	12850	13868	8383	19179	8418	-0.217686769	8.083785122	3.995220704	0.066366127	0.2496923
FBgn0071183	XL_group3a	2599721	2600395	-;-	616	14294	12414	7520	14287	5634	6822	18600	9260	11058	7601	20284	7719	0.224601057	7.706754168	3.225328556	0.095114245	0.306616091
FBgn0071184	4_group4	6569996	6577315	-;-;-;-;-	2681	3283	2367	1886	3695	1115	1098	3240	2963	2802	1304	3775	1982	0.173689794	5.500841042	2.185226548	0.162492795	0.413538673
FBgn0071185	2	11258329	11259989	-;-;-;-;-;-	1366	5	29	9	12	6	64	71	39	40	21	70	46	0.864501637	-0.444438122	1.086032248	0.31581728	0.58739129
FBgn0071187	XR_group8	8291094	8293456	+;+;+	1566	2092	1156	1023	1804	498	702	1321	1169	1285	603	1934	754	-0.118875967	4.443356984	0.763616159	0.397612906	0.660978013
FBgn0071189	2	14644230	14645191	+;+;+	861	16602	11874	6889	12176	5454	6039	14866	8868	9758	5709	14637	5609	-0.033238927	7.502418259	0.119242006	0.735226624	0.877519367
FBgn0071190	2	14646043	14646981	-;-	878	31	3	24	36	44	13	6	8	16	5	10	7	-1.626702229	-1.382932186	4.821204224	0.046306573	0.203680997
FBgn0071191	XL_group1e	8471782	8472985	-;-	1138	20	14	27	61	42	4	21	8	22	14	0	10	-1.06005984	-1.183701353	1.65264195	0.220405537	0.487514477
FBgn0071193	XL_group1a	7945488	7947161	+	1674	1087	918	712	1336	424	464	1219	813	1234	461	1469	432	0.038143362	3.991580173	0.104096378	0.751954537	0.886495127
FBgn0071194	XL_group1a	289489	291057	+	1569	2643	1433	1321	2253	893	1194	2316	1507	1671	877	2982	1065	-0.010621499	4.956952402	0.005481815	0.942074641	0.974795499
FBgn0071196	3	11709821	11714563	+;+;+;+;+;+	4406	3603	2176	3284	4714	1857	1880	3118	2073	3178	1449	3443	1305	-0.415648505	5.662541366	6.148996851	0.027169707	0.150539027
FBgn0071197	2	11006072	11009917	-;-;-;-;-	492	534	274	194	244	95	163	285	405	314	134	523	541	0.360803196	2.600274468	1.00144932	0.334715719	0.60392749
FBgn0071200	2	14666745	14669248	-;-	2425	46	15	0	5	34	35	13	7	24	0	11	3	-0.825921888	-1.467555959	0.358747486	0.559207966	0.778542433
FBgn0071201	2	14669418	14670394	-;-	922	3423	3130	1331	3123	1760	1053	4760	2210	3467	1625	3475	904	0.200510834	5.504367414	1.397748394	0.25768628	0.530781286
FBgn0071202	XL_group1a	6342463	6344248	+;+;+;+	1599	363	232	97	302	139	149	260	192	337	77	390	78	-0.079501056	1.965730264	0.079202661	0.782686406	0.900987585
FBgn0071203	XL_group1a	6339451	6341731	+;+;+;+	2042	684	432	541	886	349	331	1262	452	702	445	737	288	0.17909454	3.459770923	0.924424425	0.35337092	0.621254334
FBgn0071204	2	14670449	14671201	+	753	1183	1543	870	1683	845	636	1577	1029	1228	554	1493	328	-0.291465467	4.319697345	2.436487597	0.141875963	0.384949616
FBgn0071205	XL_group1a	6337434	6338095	+;+;+	534	654	488	512	982	249	222	979	613	907	386	797	333	0.303794023	3.425948613	3.331907596	0.090346094	0.298585303
FBgn0071206	2	29517598	29519623	-	2026	15498	6881	7094	6998	5032	4059	6829	4830	5672	2910	6225	2904	-0.685666438	6.875473745	16.51339898	0.001268203	0.023667217
FBgn0071207	XL_group1a	6357247	6359178	-;-;-	1802	203	9	58	127	51	34	167	91	62	18	75	76	0.065281764	0.570592784	0.011602082	0.915821895	0.962736376
FBgn0071208	XR_group8	8293712	8294481	+;+	714	100	30	5	32	43	11	46	13	11	28	15	12	-0.220673649	-0.78958693	0.176625119	0.680960911	0.846417815
FBgn0071209	XL_group1e	8915245	8917344	+;+;+;+;+	1826	1114	570	470	857	392	300	1077	661	1007	379	943	328	0.192070311	3.605775718	1.832545511	0.198253875	0.459058769
FBgn0071210	XR_group6	10135165	10174342	+;+;+;+;+;+;+	4123	1940	1145	1011	1847	485	569	1557	1308	1408	627	1776	927	0.059254956	4.472373607	0.208579236	0.65520945	0.834158431
FBgn0071211	XL_group1e	1778388	1783062	-;-;-;-;-	2337	1718	783	450	1057	373	231	1081	639	755	165	515	402	-0.404616924	3.566049796	1.871485701	0.193970601	0.453637932
FBgn0071214	2	21394074	21397081	-;-;-;-;-	1873	45794	29985	19755	36362	14454	17983	43297	26093	30003	17690	44929	17001	0.087005641	9.038546121	0.881980621	0.36430558	0.631557609
FBgn0071216	2	5080947	5081870	+;+;+;+	743	742	316	326	472	261	262	855	448	765	305	677	172	0.360339965	3.082822447	3.556009952	0.081228592	0.2807069
FBgn0071217	4_group3	4285157	4286713	+;+	1492	1206	786	502	1340	479	327	1292	868	1110	505	1095	320	0.163563431	3.872595991	1.11944372	0.308767227	0.581267861
FBgn0071218	XR_group6	10326789	10327865	-	1077	962	670	575	1080	338	328	1074	432	531	304	819	236	-0.308257533	3.455003061	4.006794224	0.066020771	0.249266599
FBgn0071219	XL_group1e	6023392	6043499	+;+;+;+;+;+;+;+;+;+	3613	3398	2733	1717	2479	1304	950	2613	1985	1957	740	2829	725	-0.388005211	5.135511339	6.388144699	0.024807621	0.141836772
FBgn0071221	XL_group1a	6956618	6973362	-;-;-;-;-;-;-;-;-;-;-	15806	2020	995	880	1612	589	1093	1362	1526	1327	561	1329	445	-0.209437479	4.421366112	0.887271863	0.362915409	0.629816685
FBgn0071223	2	23333896	23337122	+;+;+;+;+;+	2341	7767	5117	3550	10186	2179	1902	8164	5578	6729	3604	8010	2511	0.217155428	6.581186418	1.959229364	0.184353171	0.441196767
FBgn0071224	XL_group1a	6975039	6975996	-	958	971	540	505	986	289	378	867	456	827	267	1133	244	-0.115934668	3.458964571	0.433389364	0.521497945	0.753826366
FBgn0071227	XL_group1a	6952588	6953313	-;-;-	603	14	29	8	14	0	6	23	13	0	2	17	1	-0.526048461	-2.187700301	0.355143071	0.561162879	0.779752848
FBgn0071228	XL_group1e	6127060	6128508	-;-	1380	564	326	247	481	194	223	569	394	439	128	672	223	0.057564582	2.744366601	0.093182419	0.764866815	0.89241197
FBgn0071229	XL_group1e	6140864	6141326	-	463	451	306	292	390	132	112	408	311	438	73	326	171	-0.240970558	2.352514244	1.377995252	0.26091548	0.534085805
FBgn0071230	2	17222253	17223076	-;-;-	685	406	375	194	517	170	171	457	395	478	202	498	199	0.226110118	2.636076749	2.027454931	0.177380952	0.432756485
FBgn0071231	2	16509578	16511480	+;+	693	89	91	50	133	21	25	63	65	90	37	44	28	-0.263407149	0.187989218	0.57036428	0.463202321	0.711690813
FBgn0071232	XL_group3b	35300	41159	-;-;-;-	2951	2343	2187	1284	2652	928	751	2799	1803	2307	966	2679	971	0.090584066	5.021516636	0.734557572	0.406499706	0.667165053
FBgn0071234	2	26506955	26508224	-;-;-;-;-	849	91	6	25	62	17	60	57	23	23	10	99	25	-0.210686742	-0.338171324	0.094335897	0.763463993	0.892105891
FBgn0071236	3	16240362	16241670	+;+;+;+;+;+	922	1443	951	508	1365	536	505	1557	959	1303	609	1423	449	0.249903539	4.126860156	4.688045249	0.04899349	0.209157412
FBgn0071237	2	27220079	27221309	+;+;+	1083	274	319	168	230	129	72	602	405	502	260	606	182	0.99709594	2.504336368	23.25185884	0.000307618	0.010062332
FBgn0071238	3	16281914	16287130	-;-;-;-;-;-;-;-;-;-;-	3520	6020	4275	3513	6053	2493	2490	6879	4279	6047	2693	6604	2079	0.097734833	6.347570175	1.092816718	0.31436752	0.586415969
FBgn0071240	4_group3	1745525	1747532	+;+;+;+	1563	77	13	23	8	28	7	37	34	12	30	54	17	0.412406366	-0.804071273	0.479057453	0.500685621	0.73988652
FBgn0071241	2	27243841	27251014	-;-;-;-;-	3413	8	21	1	40	6	4	62	59	50	75	115	41	2.617042856	-0.323645356	18.94695521	0.000733488	0.016938271
FBgn0071243	3	13596083	13599899	-;-	3754	4569	2657	1281	3288	1238	790	3818	3010	3522	1989	4543	1998	0.545982972	5.620092494	9.966000499	0.007339301	0.069275266
FBgn0071244	2	10982260	10985171	-;-	2844	5080	3194	2943	5953	2548	2545	7063	3991	5357	2650	6015	1808	0.189635146	6.23721743	2.471885981	0.139239809	0.380893105
FBgn0071247	3	16249351	16250263	-;-;-	785	657	438	361	554	159	454	1201	493	915	294	839	263	0.421960974	3.318158013	2.877383912	0.112961168	0.339137504
FBgn0071248	3	9687220	9689487	+;+;+;+;+;+	1952	12455	10465	7948	12578	5527	5847	12637	7131	8544	4744	12275	4574	-0.251258966	7.346000167	7.279761519	0.017884713	0.116632915
FBgn0071249	2	6929926	6934867	-;-;-;-;-	2527	22103	19996	12136	23529	9697	10400	23153	12938	14664	8096	21097	7837	-0.249160411	8.160241782	7.255020398	0.018043523	0.117207086
FBgn0071250	2	10886764	10887986	-;-;-	1098	1406	1231	902	1705	769	471	1533	699	1318	583	1320	327	-0.272637611	4.217294622	2.482386589	0.138469532	0.379776288
FBgn0071251	2	10886190	10886744	+;+	480	1611	1364	788	1204	630	567	1294	676	1394	444	1279	416	-0.315917124	4.148613634	4.323407529	0.057353888	0.230190491
FBgn0071252	2	10882457	10886108	-;-;-;-;-	2801	1637	1788	1376	2404	815	852	2194	1509	1846	909	2329	900	-0.001969404	4.841332335	0.000286528	0.98674456	0.994386702
FBgn0071253	3	9732168	9733211	+;+;+	908	1270	744	609	1121	455	465	1688	1299	2719	903	2360	1159	1.024253314	4.509989429	37.42679692	3.24E-05	0.002253495
FBgn0071254	3	9833525	9835051	-;-;-	1417	1115	826	432	1317	134	185	652	594	924	460	926	348	0.094331727	3.521843332	0.108201508	0.74734406	0.883971958
FBgn0071256	2	18227823	18232220	-;-;-;-;-	1140	1383	845	994	1432	556	451	1362	1591	1564	509	2082	1162	0.309323716	4.438189329	3.39833388	0.087520317	0.29267097
FBgn0071257	XR_group8	7838541	7840251	-;-;-;-;-	1308	76	3	66	64	5	13	22	41	48	16	42	23	-0.338298711	-0.576676745	0.29577869	0.595487782	0.802044139
FBgn0071258	3	12745411	12747223	+;+	1745	972	364	240	508	273	186	600	356	322	222	633	178	-0.047163492	2.853849336	0.058530296	0.812502769	0.91582718
FBgn0071259	3	8882472	8901550	+;+;+;+;+;+;+;+;+	5616	3048	2197	1730	1768	1385	1143	2252	1330	773	708	1873	343	-0.787498232	4.859805544	11.32571517	0.004977952	0.055379131
FBgn0071260	XR_group6	10655791	10662357	-;-;-;-;-;-;-;-;-	3111	12219	6947	6626	8864	3575	5089	8559	5469	6146	3876	9611	4135	-0.262804093	6.987251391	3.791402245	0.072817355	0.264267923
FBgn0071263	XL_group1e	4545710	4547154	+	1445	668	297	235	483	257	209	491	311	584	223	783	160	0.187496585	2.819355214	0.836433793	0.376606551	0.643764014
FBgn0071264	3	13993299	13999503	+;+;+;+;+;+;+;+	2368	2818	1472	1219	2636	804	742	2095	2520	2663	871	3359	1720	0.322328397	5.12029001	3.603221685	0.079451667	0.277109152
FBgn0071265	3	5400114	5403034	-;-;-;-	1812	18972	11200	6269	11852	4451	4188	12449	7790	7414	5207	12100	4723	-0.142832783	7.317054046	1.080745651	0.316953506	0.58858214
FBgn0071266	3	5387030	5387903	-;-	808	271	172	181	242	79	103	354	239	386	114	302	152	0.392132477	1.990795447	4.42025285	0.054978326	0.224877716
FBgn0071267	XR_group8	4116438	4117469	+	1032	282	92	158	259	39	33	160	239	156	67	316	85	0.14932348	1.459062562	0.184398425	0.67445454	0.843142201
FBgn0071268	XR_group6	5139253	5153002	-;-;-;-;-;-;-;-;-;-;-;-;-;-;-;-;-;-	11429	5058	4632	2640	5033	1643	1901	4761	3302	4408	1739	4723	1653	-0.126429628	5.964125548	1.678106018	0.217081422	0.48366707
FBgn0071272	4_group3	1043270	1045449	-;-;-;-	1980	254	282	133	201	67	70	347	208	249	149	238	98	0.346885561	1.806783045	2.176848481	0.163242824	0.414800582
FBgn0071277	2	18154164	18157626	+;+;+;+	1443	272	60	22	151	89	71	98	156	90	59	117	95	0.285125222	1.04344488	0.302035915	0.591664525	0.7995233
FBgn0071278	2	13163432	13164640	-;-;-	1089	919	723	481	1035	299	298	1039	581	911	371	927	218	0.032993181	3.523634511	0.041230624	0.842148874	0.930157087
FBgn0071279	4_group3	1031302	1037197	+;+;+;+;+;+	5602	1114	833	619	837	567	350	1269	1079	1092	1179	1573	525	0.685139623	4.155301488	11.85833151	0.004197356	0.05069619
FBgn0071280	2	18169757	18171487	+;+	842	4862	4223	2143	5638	1454	1820	3497	2207	2733	1163	3503	1690	-0.50574693	5.716782354	16.08255508	0.001404276	0.025244306
FBgn0071281	4_group3	1045764	1047487	+;+;+	1590	27812	8939	11622	15315	4506	4562	15184	11912	16721	3608	18401	7432	-0.167390364	7.724945681	0.545850388	0.473494974	0.718856799
FBgn0071282	2	13162041	13163270	-;-;-	1115	169	84	83	120	78	18	87	79	45	21	94	45	-0.713379344	0.531684616	3.236685021	0.094591908	0.305670263
FBgn0071283	2	13160488	13161824	-;-;-	1223	94	94	54	123	35	5	179	137	96	77	91	63	0.777590662	0.701676316	3.219521771	0.095382677	0.307144348
FBgn0071284	2	13158997	13160385	-;-;-;-	1211	52	45	29	67	4	6	146	86	80	58	79	63	1.496998752	0.160364676	11.47565818	0.004681144	0.053712469
FBgn0071285	2	18031668	18034028	-;-;-	1408	7183	6134	4781	8491	3042	3035	4227	2921	5030	1904	3881	1446	-0.853127063	6.330488363	43.96253374	1.42E-05	0.001376628
FBgn0071287	Unknown_group_4	78831	86936	-;-;-;-;-;-;-;-;-;-;-	3133	838	406	411	842	362	279	769	510	692	289	808	341	0.054268596	3.330862894	0.121805045	0.732516263	0.876212497
FBgn0071288	Unknown_group_4	10731	20984	-;-	3832	12	17	23	16	27	2	19	15	9	28	26	8	0.023791222	-1.391533025	0.001237687	0.972455053	0.987645291
FBgn0071289	2	29371252	29373688	-;-;-;-	2265	1675	761	744	1297	453	586	1304	914	1148	490	1295	422	-0.044684723	4.066594784	0.106635626	0.749059378	0.885071205
FBgn0071290	2	29353301	29354890	-;-;-;-	1378	42	245	78	49	19	12	56	34	81	38	64	24	-0.544439291	0.231262018	1.052518963	0.323119072	0.593271993
FBgn0071291	2	29348930	29350405	-;-;-;-	1273	91	50	25	119	51	22	80	47	69	37	118	34	0.192365948	0.199028392	0.29762695	0.594352983	0.801340028
FBgn0071292	2	29347331	29348626	-;-;-;-	1112	25	95	69	130	78	7	4	286	287	13	258	138	0.128902718	1.149667365	0.016560642	0.899719466	0.955195002
FBgn0071294	2	20590632	20592405	-;-	1716	33625	20153	18038	30481	10529	13157	29340	17718	19392	11353	29714	11553	-0.144429977	8.552552623	2.168218658	0.16401995	0.416127313
FBgn0071295	2	20588146	20588740	-;-	528	1619	1311	927	2142	718	877	2147	1142	1661	818	2175	668	0.094761915	4.62616218	0.628288436	0.441812787	0.6955424
FBgn0071296	2	20583350	20585461	-;-;-;-	1936	1129	712	769	1618	394	552	1255	866	1120	480	1464	401	-0.006578884	4.01592224	0.001707206	0.96765234	0.985356574
FBgn0071298	4_group4	2191546	2192559	+;+	965	11066	2052	3104	3173	1446	1681	3484	2901	4254	304	4688	1438	-0.722520929	5.806489636	2.22007735	0.163206327	0.414779603
FBgn0071300	3	12121961	12125399	-;-;-;-;-;-	2411	4766	3624	2460	4879	1527	1866	5044	3198	4629	1951	4299	1348	0.029679606	5.89473234	0.065563257	0.801804409	0.910635971
FBgn0071303	2	9755922	9797946	-;-;-;-;-;-;-;-;-;-	11103	3872	3465	2144	3919	1465	1685	5373	3042	4226	1885	5391	1709	0.265958042	5.846251162	8.161561896	0.013158212	0.097748711
FBgn0071304	2	9750257	9753971	+;+;+;+;+;+	3301	3633	2561	2133	4442	1407	1147	2952	2342	3279	1032	3392	1100	-0.258597858	5.457110441	4.411943554	0.0551775	0.225298086
FBgn0071305	2	29342280	29343497	-;-;-	1094	1327	896	637	1313	519	503	1052	578	745	411	972	275	-0.411303664	3.815613561	14.49983713	0.00207157	0.032298458
FBgn0071306	2	8685682	8688532	+;+;+;+;+;+	2021	17158	14144	8907	14467	6055	7384	19615	11938	13885	8056	21177	7471	0.18536917	7.848281029	3.806586536	0.072311587	0.263729893
FBgn0071307	2	8689096	8691181	+;+;+	1964	3880	2394	1206	5220	1332	1668	3234	1949	2480	1202	3160	1211	-0.188983748	5.439418125	1.366715371	0.262783934	0.536819555
FBgn0071308	2	20581584	20582993	-;-	1351	2294	2334	3010	2248	625	632	392	568	510	119	1729	1099	-1.966725668	4.622068976	40.34430366	2.88E-05	0.002093109
FBgn0071309	2	8696629	8702138	+;+;+;+;+;+;+	3539	5413	4561	2938	6317	1560	2366	6495	4932	4800	2791	7802	3009	0.310075737	6.329547341	6.650688765	0.022486287	0.134268292
FBgn0071310	2	8702263	8704641	-;-;-	2247	6698	5849	4221	7867	2897	3606	8148	4733	5802	3275	6979	2464	-0.071318138	6.596473306	0.495663561	0.493483641	0.733703067
FBgn0071311	2	8721594	8722796	-;-	1123	599	887	771	1879	365	1084	1558	1148	1133	594	1574	648	0.078229733	4.282719152	0.061214619	0.808591405	0.913100259
FBgn0071312	3	16109291	16117080	-;-;-;-;-;-;-;-;-;-;-;-	4109	3209	2745	1591	3397	1258	1499	3327	1629	2430	1254	2823	877	-0.214714802	5.312016006	4.184396662	0.060980887	0.238515654
FBgn0071313	4_group3	1213315	1213876	+	562	6183	3070	1888	3850	2253	1234	5066	2578	3590	1621	4747	1626	0.057279666	5.81438829	0.132178619	0.72186391	0.870444601
FBgn0071314	2	8726243	8727421	-;-	1118	4984	5909	2915	7980	2353	1399	6751	3730	5106	2044	5943	2002	-0.080192498	6.231850304	0.213617636	0.651372544	0.832177153
FBgn0071315	3	16101900	16104770	-;-;-;-;-;-	2576	4894	702	702	1023	521	480	1451	942	1100	524	1270	425	-0.245935164	4.301538396	0.430525284	0.52401752	0.755514407
FBgn0071317	2	20574317	20575873	-;-	1489	12362	7749	5633	6235	2181	2081	4233	5841	4556	1142	5262	4994	-0.733100905	6.573511394	7.904190751	0.015247951	0.105884942
FBgn0071319	3	16045688	16087016	-;-;-;-;-;-;-	11711	25	3	16	1	4	3	6	10	22	3	6	0	-0.459221889	-2.424259554	0.262539838	0.616733944	0.814855736
FBgn0071320	2	7525600	7528887	+;+;+;+;+	2802	88162	67674	31397	67737	27398	35024	75746	43665	45139	27146	68651	24219	-0.181310351	9.838450061	2.384414692	0.145867641	0.390763773
FBgn0071321	2	1868465	1870084	+;+;+	1484	756	566	667	840	263	335	697	584	1148	250	960	497	-0.028063214	3.545253977	0.031730909	0.861288349	0.939035111
FBgn0071322	2	1870054	1870957	-;-;-;-	715	374	604	70	514	175	102	615	380	457	242	532	237	0.473620717	2.687896468	1.983388151	0.181918232	0.438314124
FBgn0071323	2	1894985	1896959	-;-;-	1680	15548	11350	8265	18564	5057	6263	16061	11210	16111	6395	17372	5126	0.070398677	7.679275953	0.425542243	0.525233909	0.756237525
FBgn0071324	2	20520447	20526198	-;-;-;-;-	5060	931	482	654	1345	430	490	1540	1038	1525	637	1357	426	0.500083274	4.04828336	6.719083519	0.021923946	0.132074241
FBgn0071326	3	10000405	10003336	-;-;-;-;-	2623	1865	1184	1863	2322	944	892	2128	1335	1831	855	2000	651	-0.217962124	4.800966813	1.551930797	0.234224641	0.502383671
FBgn0071327	4_group3	1289243	1292184	+;+;+;+;+	2172	1244	968	811	1427	522	490	1176	1190	1004	484	1643	660	0.029755485	4.16308424	0.049813419	0.826759705	0.922551268
FBgn0071328	2	27565790	27570166	-;-;-;-;-	4124	94424	73082	49546	76118	33831	38410	98814	59414	60847	38564	101322	39040	0.04301773	10.20118523	0.162589951	0.693152756	0.853226676
FBgn0071329	2	27563677	27565821	+;+	2082	716	3252	463	3740	63	160	357	257	317	74	4415	1880	-1.108793912	4.453589994	1.598197866	0.232921004	0.500865416
FBgn0071330	2	27520562	27522335	+	1774	8	23	3	20	0	2	31	14	34	22	30	12	1.50720117	-1.579053253	4.885591929	0.045070092	0.200639476
FBgn0071331	4_group3	1329852	1330839	+	988	0	81	399	7	0	1	7	149	874	0	140	261	0.660495827	1.658514034	1.541213793	0.235761518	0.504241942
FBgn0071332	2	27551088	27552946	-;-	1800	3308	4244	2810	6195	1702	2011	4565	2580	3657	1857	3826	1156	-0.295585389	5.854762266	3.348142835	0.08964539	0.2971584
FBgn0071335	4_group3	5555523	5559719	+;+;+;+;+	2578	4801	3437	2329	4179	1922	1834	4943	2673	3716	2016	4462	1414	-0.000141411	5.851243411	2.72E-06	0.998707554	0.999419447
FBgn0071336	4_group3	5593608	5595722	-;-;-	1986	686	520	580	775	358	425	954	592	923	386	936	276	0.09192954	3.532046166	0.273769931	0.609370856	0.810379369
FBgn0071337	4_group3	5596739	5598560	-	1822	1760	1925	1202	1829	993	1014	2946	1637	2092	994	2554	986	0.198554431	4.954661202	2.148323001	0.165829401	0.417936142
FBgn0071338	4_group3	11118430	11139414	-;-;-;-;-;-	1596	70	55	34	105	52	37	61	65	42	26	116	27	-0.168744928	0.138185407	0.21263037	0.652119982	0.832842523
FBgn0071341	XL_group1e	7444090	7463759	+;+;+;+;+	5959	6596	3723	3476	4990	2014	2015	4906	3857	3449	2913	4644	1887	-0.040150485	6.115623575	0.084358396	0.77592872	0.897438848
FBgn0071344	XL_group1e	7436196	7443326	-;-;-;-;-;-;-;-;-;-;-	6394	2536	2304	1340	2413	858	659	1734	1358	2270	885	1903	804	-0.227182654	4.851800625	2.490002149	0.137914194	0.378969803
FBgn0071345	3	9955562	9969865	+;+;+;+;+;+;+;+;+;+;+;+;+;+;+;+	6038	3696	2467	2000	3800	1134	1029	3504	3527	3429	1400	4527	2142	0.290586973	5.629210564	6.12809001	0.027388466	0.15130086
FBgn0071351	3	7413585	7418871	+;+;+;+;+;+;+;+;+;+;+;+;+	3260	7749	4703	3291	6731	2470	4231	4044	3293	3545	1809	4850	1846	-0.64723028	6.254150457	18.38720685	0.00082861	0.018245568
FBgn0071353	2	23005311	23007363	+;+;+;+	1874	6355	5483	3431	6448	2456	2752	7068	4553	5847	2988	6735	2360	0.064522471	6.433968577	0.572401622	0.462421008	0.711134171
FBgn0071354	2	21542039	21543925	-	1887	0	2	0	6	0	0	22	24	23	9	27	5	3.643802375	-2.255450226	17.43089987	0.001026068	0.020930352
FBgn0071355	2	21398745	21401029	+;+;+;+	1262	139	76	43	76	78	67	194	79	128	47	123	52	0.329287033	0.807567218	1.08324719	0.316415143	0.587805364
FBgn0071356	2	21401047	21402354	-;-;-;-	1124	1304	1706	565	1813	476	765	1546	1168	1805	612	1650	577	0.046901576	4.398390879	0.054699138	0.818619906	0.918633141
FBgn0071357	2	27391757	27397564	-;-;-;-	5620	2439	1842	1074	2453	958	1036	2020	1344	1632	886	2457	715	-0.165267433	4.847921831	2.619510563	0.128878929	0.364628474
FBgn0071358	2	27388992	27391498	+;+;+;+	2314	3067	2492	1618	3830	1227	1379	3926	2310	3584	2007	3591	1229	0.287478623	5.533752615	6.359501461	0.025077469	0.142812247
FBgn0071359	2	27386806	27388408	-;-;-;-	1346	2555	1989	1331	2893	1078	1119	2454	1462	2318	822	2244	618	-0.261238828	4.979009667	4.00177006	0.066170429	0.249575009
FBgn0071361	2	27371749	27373105	-;-;-	1233	3027	1020	1624	3148	1353	1446	2848	1691	2639	943	2287	802	-0.142577898	5.141540933	0.451374297	0.513117397	0.747753249
FBgn0071362	2	27370949	27371777	+	829	10874	9974	5620	12097	4587	4131	10604	6212	8039	4194	10509	3276	-0.207760575	7.093821602	5.269293139	0.038460665	0.183221467
FBgn0071363	2	27368934	27370441	-	1508	13314	9774	7591	12172	5049	5231	10456	6511	6527	4560	11389	3958	-0.356617023	7.223036559	13.14710727	0.002945314	0.040470809
FBgn0071364	2	27366549	27368536	-;-;-	1859	1977	1045	930	1663	677	666	1943	1046	1974	674	1864	444	0.086858056	4.470943754	0.301128704	0.592215596	0.799877732
FBgn0071365	2	27362763	27366484	+;+;+;+;+;+;+;+;+	3043	11036	4921	4895	9964	3692	3401	9779	5751	8711	4686	10120	3422	0.177841251	6.930259722	2.551982362	0.133495577	0.372393074
FBgn0071366	2	27359403	27362334	-;-;-;-	2686	2034	1218	560	1274	552	484	1904	1333	1561	830	1675	685	0.453087211	4.409257562	9.885224719	0.007525042	0.070529859
FBgn0071367	2	27357067	27360362	+;+	3170	2832	1745	1077	2813	656	1010	1478	1093	1458	721	1630	548	-0.521532052	4.675840559	14.32155215	0.00216756	0.033369971
FBgn0071368	2	27335756	27356367	+;+;+;+	4650	2792	2246	1841	3164	1239	976	3132	1696	2566	1565	2504	1007	0.001640397	5.258094006	0.000156043	0.990217667	0.995815323
FBgn0071369	XR_group6	7701793	7703131	-;-	1225	199	169	147	280	67	111	237	220	218	132	238	115	0.221452824	1.752237292	1.047493132	0.324234672	0.594150057
FBgn0071370	2	27332424	27334921	-;-;-;-;-	2230	1590	1127	908	1581	604	458	1109	943	1332	561	1364	490	-0.18581139	4.201992397	2.139114157	0.166675429	0.419315181
FBgn0071371	2	27327027	27330848	+;+	3751	2126	1961	1035	2324	740	631	1948	1646	2177	951	2571	1359	0.221070624	4.897849741	2.563579633	0.132688357	0.370996749
FBgn0071372	2	27322884	27324207	-;-	1262	1935	2159	1208	2875	1181	784	2860	1697	2704	1189	2704	726	0.139466498	5.057501833	0.728630131	0.408350269	0.668738153
FBgn0071373	2	23167158	23168280	+	1123	437	349	265	462	173	212	393	383	458	192	478	151	-0.004081347	2.614626453	0.000611078	0.980643205	0.991842602
FBgn0071374	2	24340696	24344320	-;-	3567	3	7	0	13	11	0	31	2	5	3	18	2	0.874475635	-2.526194583	0.876746548	0.365688505	0.632536459
FBgn0071375	2	21618645	21619725	+;+	959	5742	3184	3000	4546	1527	1722	3777	2505	3661	1243	4260	1500	-0.356812229	5.779489934	11.16090191	0.0051279	0.056414583
FBgn0071376	XR_group8	5932762	5935546	+;+;+;+;+	2416	0	464	0	0	0	0	42	14	225	24	11	4	-0.175678311	0.20287009	0.009039387	0.925910716	0.968303239
FBgn0071377	2	21615976	21617080	+;+;+	982	14423	11588	6947	15618	5838	5817	17881	10191	12720	6096	18014	6373	0.162470733	7.633895935	3.798229924	0.072589411	0.264243078
FBgn0071378	2	21453890	21456790	-;-;-;-;-;-	2600	2865	999	594	2264	741	1059	1469	1242	1413	626	1922	667	-0.108276713	4.580948568	0.240410683	0.631852236	0.822074848
FBgn0071379	XR_group3a	1310885	1339411	+;+;+;+;+;+;+;+;+	5112	413	232	250	429	177	88	222	184	198	158	293	85	-0.45160877	2.083312836	3.763765332	0.073748829	0.266141049
FBgn0071380	XR_group6	6357673	6359778	-	2106	42	31	20	62	29	23	79	29	89	32	82	44	0.722285407	-0.141013069	3.560542826	0.081055925	0.280374088
FBgn0071381	XR_group6	6350240	6356963	-;-;-;-;-;-;-;-;-	2772	3437	1963	1877	3621	1095	1231	2981	1932	2417	980	3439	1414	-0.122259993	5.317958726	1.122929813	0.308044406	0.580724036
FBgn0071383	XR_group6	6886959	6889228	+;+;+;+;+	2006	1633	1048	852	1569	643	592	1349	971	1090	585	1559	551	-0.118344514	4.257592267	1.321209808	0.270507799	0.543372288
FBgn0071384	2	21860142	21861898	-	1757	1785	1238	789	1838	460	843	1963	1256	1593	707	2125	714	0.193091929	4.523743855	1.911184893	0.189473495	0.44674863
FBgn0071385	XR_group8	5409999	5445205	-;-;-;-;-;-;-;-;-;-;-;-;-;-;-;-;-	13898	39064	40675	15645	36389	14657	10721	4439	22830	22756	12433	31842	13888	-0.541637721	8.693911942	1.809760752	0.204533912	0.467293375
FBgn0071387	XR_group8	5457467	5460125	+;+;+	2513	342	330	276	415	104	159	413	280	383	175	426	213	0.108284032	2.44704882	0.432350859	0.521989544	0.754205267
FBgn0071389	XR_group8	5459951	5461316	+;+	1273	771	544	473	650	245	297	652	611	640	208	875	420	-0.036743449	3.300585193	0.065371373	0.802087932	0.910798319
FBgn0071390	XR_group8	1266755	1268646	-;-;-;-;-	1162	5993	4860	2538	6488	2122	2295	6113	4145	5726	2220	6598	2541	0.096620567	6.279337236	0.927163561	0.352681875	0.620562921
FBgn0071391	XR_group8	5461401	5463239	+;+;+;+	1653	23	66	20	32	10	9	47	48	24	10	33	18	-0.009085576	-0.857933046	0.000393564	0.984465048	0.993250647
FBgn0071392	XR_group8	4544383	4545484	-;-	1039	148	105	48	132	63	27	249	117	193	85	183	57	0.773546653	1.074359253	8.217111464	0.012912851	0.096661591
FBgn0071393	XR_group8	1273625	1275101	-	1477	726	382	382	590	205	230	765	770	909	333	1025	385	0.613561242	3.344101097	17.73849615	0.000957163	0.020025422
FBgn0071394	XR_group8	3255820	3264822	-;-;-;-;-;-	1952	0	2	4	0	0	6	46	20	6	8	62	6	2.969837481	-1.925306474	8.423900235	0.012045096	0.092815493
FBgn0071395	XR_group8	517541	519038	+	1498	624	796	459	1099	340	284	791	491	697	275	1325	228	-0.126854133	3.445849875	0.369002096	0.553719205	0.774447573
FBgn0071396	XR_group6	4965604	4967232	+;+;+;+	1435	15103	12334	6896	13812	4440	5974	13635	8131	11067	5349	13037	4994	-0.110971217	7.442507563	1.420217659	0.254077913	0.526812824
FBgn0071397	XR_group6	4967308	4968568	+;+	1195	6683	5083	3138	5777	2293	2526	6113	3272	3694	2162	5769	1724	-0.235025681	6.190549059	6.330062439	0.025358404	0.143798795
FBgn0071398	XR_group6	4969447	4972852	+;+	3351	2950	1702	1416	2605	925	1062	2313	1561	1706	868	2237	611	-0.259441273	4.913322922	5.361534917	0.037046666	0.179631686
FBgn0071399	XR_group6	4981224	4994531	+;+;+;+;+	1213	5	13	0	6	6	4	58	60	83	17	76	41	2.986036977	-0.746266321	19.477215	0.000654817	0.01566335
FBgn0071400	XR_group6	5034260	5035623	+;+	1291	6512	4597	4064	6587	3035	3557	7377	3895	3744	2942	6873	3478	-0.071120155	6.497975779	0.182464632	0.676057636	0.84354703
FBgn0071401	XR_group6	5044328	5046994	+;+	1885	4838	3930	2897	4535	1945	1681	4367	2991	4541	1758	5493	2013	-0.051475742	5.966269227	0.321727509	0.579963977	0.791702847
FBgn0071402	XR_group6	5065208	5071133	+;+;+;+;+;+	1523	72	38	47	66	22	28	25	43	54	42	33	9	-0.312544934	-0.322167647	0.529844035	0.479218185	0.723371998
FBgn0071403	XR_group8	3168442	3169248	-;-	737	1909	1957	990	1768	706	734	2232	1228	1354	583	1924	874	-0.114280757	4.625238764	0.697812675	0.418187333	0.676337451
FBgn0071404	XR_group6	6414886	6416682	-;-;-;-	1601	22	2	20	32	0	0	54	2	24	10	34	8	0.774773209	-1.625777731	0.742626883	0.404001324	0.666449141
FBgn0071405	XR_group8	4587709	4590402	-;-;-;-	2022	4102	1871	1666	3349	865	1224	2386	1846	2115	706	3085	1296	-0.313759277	5.188628727	3.711484037	0.075550315	0.269766145
FBgn0071406	XR_group3a	771415	777255	-;-;-;-;-;-;-;-	5363	1413	954	683	1344	428	421	1743	934	1169	518	1396	338	0.140159481	4.055394736	0.894880947	0.360929977	0.628226899
FBgn0071407	XR_group8	3326659	3328420	-;-	1685	2104	1734	1162	2322	684	679	2143	1369	1709	816	2156	617	-0.050097881	4.702750718	0.190661066	0.669330868	0.840066435
FBgn0071408	Unknown_group_762	3635	5173	-;-;-	1420	10843	16778	7158	14045	6025	6340	12903	8016	8742	3528	11863	4147	-0.509784298	7.407005069	10.04537864	0.007161935	0.068392285
FBgn0071410	3	6479974	6482128	-	2155	1061	974	546	1343	311	449	1029	820	1013	363	1188	431	-0.065823778	3.832148377	0.230106514	0.63919141	0.82626201
FBgn0071411	2	483091	484584	-;-;-	1349	18	14	4	22	0	73	48	92	91	2	90	98	0.715999824	-0.038684942	0.219330011	0.647688126	0.831042058
FBgn0071413	2	2356274	2363577	+;+;+;+;+;+;+;+	6538	112	223	65	146	55	63	218	209	194	135	276	54	0.644855082	1.432278371	4.408071556	0.055270605	0.225483476
FBgn0071414	4_group1	4998774	5007071	+;+;+;+;+;+;+	3470	1441	996	815	1484	911	700	2251	1456	2002	984	2020	730	0.495489973	4.627513764	11.65245328	0.004450031	0.052369881
FBgn0071418	XL_group1e	3857182	3858173	-	992	2159	989	702	1303	399	546	962	923	1143	430	1776	635	-0.131268643	4.152625092	0.46629067	0.506350753	0.744136574
FBgn0071419	XL_group1e	10782605	10783355	-	751	0	746	1491	20	0	0	39	247	2022	0	671	491	0.057833	3.18157032	0.006993803	0.93479341	0.972314665
FBgn0071420	XL_group1e	1162458	1164673	-;-	2157	2334	946	1002	1862	683	773	1343	869	1443	562	1354	331	-0.408773804	4.346554236	5.669211315	0.032753494	0.168023253
FBgn0071423	XL_group1e	3836300	3853649	+;+;+;+;+;+;+;+;+;+;+	3188	2608	1973	1349	2992	881	795	2387	1869	1283	1062	2568	1564	0.039727769	5.04739509	0.044505075	0.836095901	0.927683047
FBgn0071424	2	685782	687366	+;+;+;+;+	1341	15154	14829	7047	12298	5853	7028	17448	9327	9620	6053	15339	5768	-0.051789925	7.597997675	0.154467612	0.70049266	0.857418852
FBgn0071425	2	6735551	6737160	-;-;-	1430	52	26	2	19	16	12	207	165	162	84	195	74	3.043145705	0.637407881	43.96501673	1.42E-05	0.001376628
FBgn0071426	2	687406	688759	+;+;+;+	1171	14817	13584	7086	13245	6390	7237	13722	8044	7998	5530	14219	4684	-0.273969309	7.502117402	5.264303176	0.038538954	0.183534897
FBgn0071427	2	457055	462406	+;+;+;+;+;+;+;+;+	3453	73061	57911	36084	82191	23957	25103	67042	45243	42765	27031	70952	26730	-0.114225679	9.768620279	1.188648072	0.294848648	0.567377508
FBgn0071429	2	559035	578508	+;+;+;+;+;+;+;+;+	5648	3346	2200	1784	3037	1250	881	3029	2548	2906	1390	3270	1697	0.200649833	5.398109461	2.673591716	0.125322985	0.358808442
FBgn0071430	2	316871	368758	+;+;+;+	3987	90	62	20	90	58	36	58	57	64	23	69	44	-0.174577321	0.136186827	0.173501195	0.683623598	0.848076678
FBgn0071433	XR_group8	1276301	1278192	+	1892	207	95	25	127	30	44	104	77	108	42	222	28	0.208834898	0.660489248	0.267662543	0.613350656	0.813023065
FBgn0071434	XR_group8	4018771	4019846	-;-;-	956	3371	3803	2011	4246	1261	1593	4770	2894	4251	1563	4369	1737	0.136322755	5.755645951	1.389049759	0.259101658	0.531855493
FBgn0071436	XL_group3b	26157	28205	+;+;+	1935	1434	1495	776	1854	570	765	1471	943	716	641	1407	402	-0.33386609	4.261687796	4.270004075	0.058716041	0.232923767
FBgn0071437	XR_group8	4003419	4006255	-;-	2767	22174	17208	11807	19135	8559	9795	23558	14563	15081	9317	25439	8185	0.022401115	8.151106242	0.052732774	0.821847828	0.920567346
FBgn0071438	XR_group3a	602368	606480	+;+;+;+;+;+;+;+;+	2793	5288	5143	3190	5377	2308	1938	5820	3871	5594	2320	6155	2161	0.034464105	6.225693322	0.125405735	0.728762488	0.87409838
FBgn0071439	XR_group3a	595249	601804	+;+;+;+;+	2495	2075	1485	1022	2012	671	671	1994	1223	1756	629	2083	640	-0.048696128	4.593305369	0.214258346	0.65088861	0.831993125
FBgn0071440	XR_group3a	1086428	1093025	-;-;-;-	3100	4518	2033	2949	2939	1455	1132	2741	2318	3296	680	3554	1522	-0.404112907	5.469428105	4.723369959	0.048263101	0.2076883
FBgn0071441	XR_group3a	1100679	1112539	-;-;-;-;-;-;-;-;-;-;-;-;-;-;-;-;-;-;-;-;-;-	4951	1660	1182	788	1876	516	502	1774	1373	1468	721	1564	632	0.203234444	4.399351283	2.679762357	0.124924978	0.358354132
FBgn0071442	XR_group3a	1113567	1115571	-	2005	2775	2055	1615	3226	1040	970	2260	1423	1932	808	2003	841	-0.412396015	4.99110153	18.16755623	0.000869769	0.018952957
FBgn0071443	XL_group1e	9459775	9464091	+;+;+;+;+;+	4002	288	448	449	516	362	256	473	455	520	77	471	257	-0.554257435	2.894481402	3.007421238	0.105849656	0.326393848
FBgn0071444	XR_group5	163391	164724	-;-;-	1215	1812	708	998	1966	252	568	1439	1182	1523	650	1647	830	0.191996873	4.348402046	0.682563263	0.42319374	0.679523109
FBgn0071447	XR_group6	5153809	5157040	+;+;+;+	2956	9848	9284	5701	10057	3785	4368	10788	6400	7202	3981	10658	4173	-0.091519901	7.048535962	0.948538832	0.347371577	0.615867499
FBgn0071451	XR_group8	4146731	4148954	-;-;-	2104	4198	3224	2179	3727	1625	1607	3773	2166	2614	1451	3314	1335	-0.239062347	5.589248853	7.700762466	0.015417088	0.106650246
FBgn0071453	XL_group1e	3855787	3856869	-;-	1002	269	142	188	347	69	113	205	228	205	59	306	167	-0.204989426	1.825064897	0.653570387	0.432979219	0.688591645
FBgn0071454	3	6555345	6556268	-;-;-	778	7792	5891	3358	6565	3133	2427	7788	4004	5734	2494	6229	2950	-0.059170972	6.475392491	0.284021626	0.602817236	0.807022562
FBgn0071455	XL_group1e	7831469	7832804	-;-;-;-	1150	1086	813	479	847	423	430	1175	729	1017	334	954	290	0.007162543	3.695766706	0.002092631	0.964189013	0.984827104
FBgn0071456	XL_group1e	7743008	7747426	-;-;-	4286	993	471	390	821	518	246	605	485	591	367	699	213	-0.159649795	3.323867507	0.715272461	0.412569071	0.672219128
FBgn0071458	3	18076102	18087888	+;+;+;+;+;+;+;+;+;+;+	5493	476	444	321	562	213	258	527	491	443	230	757	299	0.118947146	2.972283827	0.549447476	0.471354247	0.716645413
FBgn0071459	XL_group1e	10818440	10819548	-;-	1046	14266	14806	7351	16092	4217	7165	18160	15339	10287	7885	26872	11305	0.411336273	7.884876851	4.205480461	0.061054179	0.238592015
FBgn0071461	XL_group3b	194629	198039	+;+	3337	1338	830	564	1121	511	365	920	825	1144	464	1323	310	0.01221768	3.868617937	0.005609017	0.941407772	0.974795499
FBgn0071462	2	4275503	4277127	+;+	1555	3739	4114	2275	6510	1972	1936	4491	2652	3324	1459	4173	1541	-0.313285386	5.855624534	5.312963231	0.037783449	0.181291312
FBgn0071463	XL_group1e	10784798	10786377	+;+	1353	2	33	59	0	0	2	2	6	72	0	14	18	-0.925595603	-1.42497025	1.17660827	0.297206554	0.570001654
FBgn0071464	XL_group1e	3425726	3427205	-	1480	244	278	105	255	215	133	202	160	165	103	138	87	-0.509428551	1.797634705	3.244208184	0.094247795	0.305028067
FBgn0071465	XL_group1e	3423393	3424355	-	963	1036	1381	737	1677	665	651	1450	948	1349	411	1562	548	-0.194745974	4.249091553	1.37283075	0.261768725	0.53545923
FBgn0071466	XL_group1e	3854548	3855903	+;+;+	1208	12830	10500	5779	11066	4987	4891	13075	7943	8587	5135	13719	4680	0.027146053	7.300652262	0.085661736	0.774256273	0.896735422
FBgn0071467	XL_group1a	6985014	6990213	+;+	1856	65	94	59	162	12	30	47	92	108	37	53	115	0.054702034	0.526239466	0.015353921	0.903228002	0.957199805
FBgn0071468	XR_group8	948693	987630	-;-;-;-;-;-	4492	710	516	563	896	221	247	1617	1410	1502	783	2019	823	1.292464083	4.107240316	82.89348658	4.22E-07	0.000119119
FBgn0071469	XL_group1e	1187462	1192726	+;+;+;+;+;+;+;+	1494	318	173	165	201	79	64	238	200	204	61	156	215	-0.043251526	1.719451415	0.021275755	0.886204926	0.949936868
FBgn0071472	XL_group1e	1165309	1172623	+;+;+;+;+;+;+	6849	904	844	409	920	256	287	915	589	761	462	883	248	0.104823747	3.486957434	0.407225188	0.53415164	0.762801639
FBgn0071473	XL_group1a	8997085	8999517	+;+;+	2302	3900	3908	2505	4325	1660	2031	5671	3550	3676	2481	5655	2027	0.250305647	6.001625749	4.831857192	0.046099252	0.203037386
FBgn0071474	3	2135453	2135885	-;-	352	11139	11452	4134	11796	5498	6585	15947	7982	9357	4923	15329	5173	0.134317284	7.388361434	0.627048081	0.442253679	0.695769061
FBgn0071475	XL_group1e	1161341	1162467	+	1127	373	228	209	425	101	114	278	199	292	172	361	182	0.067457576	2.181725093	0.111589614	0.743519638	0.881363441
FBgn0071476	3	6137015	6138715	-;-	1628	682	413	227	550	206	211	454	301	565	258	477	190	0.025504145	2.79339311	0.023150626	0.881336514	0.947806207
FBgn0071477	3	6138716	6141023	+;+;+;+	2145	847	2127	759	1982	695	479	1654	1047	1305	583	2079	792	-0.051209191	4.447728303	0.047801376	0.830244538	0.924629765
FBgn0071478	2	16113410	16119325	-;-;-;-;-	1855	1113	328	394	353	253	86	415	222	129	29	2108	1207	-0.157485798	3.357072226	0.026595875	0.87338065	0.943950372
FBgn0071479	XL_group1a	7839769	7846760	+;+;+;+;+;+;+;+;+	5644	4365	4017	1869	3107	1500	1818	3492	3075	3173	1400	3611	1567	-0.130916072	5.674201629	0.828596799	0.378785633	0.645311591
FBgn0071480	XL_group1a	7800136	7801203	+;+	986	1279	1283	618	1201	472	318	1183	438	1047	397	1250	371	-0.248756401	3.864682811	1.690257604	0.215518151	0.482003211
FBgn0071481	XL_group1a	7728191	7753288	+;+;+;+;+;+;+;+;+;+;+;+;+	14773	6971	3662	3391	3775	1625	1862	4615	4163	5641	1527	5482	2147	-0.039031285	6.07355735	0.066155977	0.800931416	0.910259205
FBgn0071482	XR_group3a	721305	740562	-;-;-;-;-	2158	129	49	93	176	72	56	314	316	184	113	672	144	1.380046511	1.784105285	16.07191209	0.001407844	0.025258259
FBgn0071483	3	10978273	10981008	-;-;-;-;-;-	2306	1062	568	588	925	243	298	947	798	866	296	968	424	0.096753669	3.579324508	0.442392319	0.517271688	0.751130267
FBgn0071484	XL_group3a	454890	457424	+;+;+;+;+	2265	4247	3243	2086	4504	1884	1982	5195	2640	3942	2060	4851	1221	0.082563664	5.84701677	0.591672414	0.455138392	0.705202824
FBgn0071485	3	1198582	1202676	+;+;+;+;+	1010	115	149	145	149	35	57	256	225	230	21	259	198	0.325656344	1.514538447	1.276837857	0.278338639	0.551623779
FBgn0071486	3	1209679	1211529	+;+;+;+;+	1015	382	254	192	413	122	99	326	282	322	194	457	106	0.21026584	2.242888243	1.158099076	0.300882754	0.573635724
FBgn0071488	XL_group1a	7795075	7800041	-;-;-;-;-;-;-	4533	322	162	128	265	81	112	305	208	243	154	271	130	0.357565975	1.885841018	3.620538419	0.078811655	0.276188684
FBgn0071489	XL_group1e	11665340	11667660	-;-;-;-	2093	4154	2873	1875	4745	1325	1199	4274	2508	2830	1348	3271	1116	-0.094470303	5.539345559	0.580722988	0.459252603	0.708810738
FBgn0071490	XL_group1e	11655571	11659741	+;+;+;+;+;+	3806	1879	1012	787	2010	750	574	1501	734	1113	466	1417	287	-0.397241232	4.213163564	5.98888007	0.02889894	0.156331027
FBgn0071492	XL_group1e	11662594	11665378	+;+;+	2631	535	370	396	649	209	150	543	445	514	253	667	237	0.11708358	2.919835017	0.530474618	0.478961734	0.72326866
FBgn0071493	XL_group1e	11667930	11669707	+;+;+	1213	1789	1237	1009	1951	720	709	1433	1089	1617	617	1731	781	-0.137268417	4.502051684	1.42475285	0.253357821	0.526086293
FBgn0071494	XL_group1e	11670266	11672573	+;+;+;+	1904	20102	13855	12184	17671	8355	8822	22829	13136	14162	9660	22662	9820	0.112458057	8.085517497	0.905699333	0.358134617	0.625659941
FBgn0071495	3	13402952	13404125	+;+	1093	4713	2682	1930	3892	1768	1904	3507	2050	3214	1314	3269	998	-0.292423469	5.579028452	6.620157395	0.022742752	0.135286677
FBgn0071497	2	21320472	21322385	-;-;-;-	1698	25324	19949	12445	21788	9179	10744	30644	17097	16661	11013	29542	11042	0.151456281	8.366772209	1.932694212	0.187158992	0.443713336
FBgn0071502	2	17330261	17331243	+	983	1260	529	597	925	537	281	1573	1080	1319	467	1565	617	0.56486668	4.019147893	8.635106005	0.011228022	0.089090197
FBgn0071503	3	1326800	1329022	+;+;+;+	2032	773	303	297	1801	290	105	2361	1446	1916	1019	2439	843	1.673838054	4.303578287	19.15024457	0.000903613	0.019356595
FBgn0071504	2	21723037	21724036	+;+;+	878	2569	2250	1141	2951	868	904	2947	1362	2146	931	2349	752	-0.076289932	4.968481161	0.352930911	0.562369431	0.780525405
FBgn0071505	XL_group3b	136305	138280	+;+	1892	1124	886	488	1159	330	540	1352	747	879	430	1216	384	0.076526134	3.840176556	0.291086913	0.598389464	0.804149149
FBgn0071506	XL_group3b	119348	122593	-;-;-;-;-	2959	983	928	545	1213	502	429	888	681	867	394	1344	531	-0.091448832	3.848596377	0.370749839	0.552794286	0.773929244
FBgn0071507	XL_group1e	1215133	1218820	-;-;-;-	1393	67	108	151	160	48	103	145	154	139	112	269	133	0.386766098	1.413568778	1.170695615	0.298374082	0.57134552
FBgn0071508	4_group2	19098	21843	+;+;+;+;+	2467	7042	3772	2535	4406	1792	1381	5100	3514	4576	1573	4768	1896	-0.023074822	5.965988135	0.026201597	0.873827888	0.944364253
FBgn0071510	2	17457468	17458937	+	1470	697	538	306	988	385	344	627	403	551	243	652	200	-0.319824719	3.190364676	3.870781628	0.070219303	0.258473909
FBgn0071512	XR_group3a	1342043	1344430	+;+;+	2209	1640	1313	538	1151	546	486	1143	764	996	399	1013	214	-0.380271981	3.926710533	3.819735325	0.071877017	0.262732143
FBgn0071514	XR_group3a	1286939	1288707	+;+;+;+	1590	263	217	103	278	27	120	287	132	216	65	256	101	-0.044896403	1.603523313	0.019589211	0.890775481	0.951514494
FBgn0071515	XR_group5	17038	105630	-;-;-;-;-;-;-;-;-;-;-;-;-;-;-;-;-;-;-	7794	202	95	66	167	64	78	237	122	141	81	140	50	0.255193816	1.148352591	1.314181752	0.271727992	0.54453118
FBgn0071516	XR_group8	4581465	4584856	-;-;-;-;-;-	3082	736	735	545	971	317	334	1173	680	1149	482	1048	325	0.303140573	3.68499	4.088804559	0.063634115	0.243780783
FBgn0071517	3	4040641	4042340	+;+	1489	707	429	413	677	198	278	2092	1191	1500	797	1970	669	1.530464003	4.028464244	144.1356469	1.53E-08	1.07E-05
FBgn0071518	XR_group6	6465244	6470301	-;-;-;-;-;-;-	3394	44	66	47	19	35	18	184	140	363	139	177	169	2.181005113	1.221891943	26.29151635	0.000177288	0.006906713
FBgn0071521	4_group3	3596843	3600457	+;+;+;+;+;+;+;+;+	3035	3929	3194	2568	5111	1782	1895	4499	2605	3663	1619	4036	1345	-0.166981251	5.790902184	2.506526869	0.136718648	0.377066316
FBgn0071522	XL_group1a	5486105	5601228	-;-;-;-;-;-	4553	1011	588	501	708	288	269	706	655	793	277	780	495	0.023500633	3.451665007	0.022078071	0.884095746	0.949105638
FBgn0071524	XL_group1a	5474255	5478977	+;+;+;+;+;+;+;+	3642	8379	6638	4551	8280	2968	3054	8147	5450	6644	3081	7718	2631	-0.092196397	6.675651211	1.345025888	0.266427687	0.539669426
FBgn0071525	XL_group1a	5438448	5439266	-;-;-	693	4182	2542	1993	3125	1267	1506	4138	2240	3096	1406	4040	1914	0.115860087	5.589940122	0.982782429	0.339103538	0.608406263
FBgn0071526	4_group3	11159371	11160650	+;+	1224	20	38	18	24	17	14	65	21	27	4	32	13	-0.062755813	-1.066876814	0.015934651	0.901425111	0.956315415
FBgn0071528	2	12980674	12991277	+;+;+;+;+;+;+	2881	4750	2961	2858	5319	1162	1497	5442	3348	3803	2109	5345	2300	0.23793241	5.940807033	3.290999128	0.092141267	0.301869012
FBgn0071530	XR_group8	1363333	1366479	-;-;-;-;-	2368	40	8	0	18	6	4	29	45	31	20	14	37	1.77909547	-1.182443694	4.543995421	0.052110927	0.217306412
FBgn0071531	3	6975866	6978507	-;-;-;-;-	1201	9571	6211	5224	8277	3176	3234	9501	7343	8658	3508	10598	4914	0.19929705	6.938649334	5.262180954	0.038572308	0.183634192
FBgn0071532	XL_group1a	8733854	8743774	-;-;-	7435	1370	1040	857	1137	525	502	1369	726	952	559	1225	601	-0.0755165	4.085277521	0.331033416	0.574600357	0.78789613
FBgn0071533	2	22558657	22561083	-;-;-;-;-	2230	8284	7080	4592	9467	3575	3150	8685	4795	7495	3275	7429	2344	-0.166462342	6.730123999	2.495574966	0.137509564	0.378344504
FBgn0071534	3	6895853	6898379	-;-	2467	38142	32161	19856	26239	14051	16179	35576	23404	24224	16634	42254	16615	0.034469244	8.900041124	0.062743736	0.806016127	0.911943428
FBgn0071535	XL_group1a	6758480	6760162	+;+;+	1520	3810	2686	2226	4008	1575	1429	4902	2488	3544	1622	4572	1164	0.099235001	5.670221956	0.768495139	0.396150211	0.660208883
FBgn0071536	XL_group1e	10795779	10802984	-;-;-;-;-;-;-;-	4840	73371	57760	41737	60234	27357	25921	62135	37710	38336	22468	55130	20425	-0.368315068	9.649835428	14.05664675	0.002319837	0.034873541
FBgn0071538	2	4273022	4273843	+;+;+	712	423	679	515	1107	296	321	1088	526	787	309	936	282	0.043348016	3.452341369	0.042541073	0.839697311	0.929081408
FBgn0071539	XL_group1e	9818354	9824808	+;+;+;+;+;+	4071	3773	2380	2590	4550	1264	1221	3019	2650	3266	1685	4664	1594	0.028786451	5.633133786	0.044805115	0.835553096	0.927431101
FBgn0071541	XL_group1e	10345589	10352880	+;+;+;+;+;+	6042	9412	9186	6325	10547	5315	4651	9560	5936	9545	4279	9602	3355	-0.228220731	7.100068779	3.660573528	0.07735556	0.273655957
FBgn0071543	XR_group6	9224791	9226637	+	1847	26474	17367	13126	17850	8443	10896	20161	11080	11167	8614	19152	7734	-0.316538142	8.072236801	5.836818524	0.03066192	0.161757431
FBgn0071544	XL_group1e	12519905	12522392	-;-	2423	812	795	1077	1010	362	521	991	645	834	309	1171	359	-0.38816212	3.792894031	4.524458788	0.052551613	0.21867793
FBgn0071546	XL_group1a	5403159	5408962	+;+;+;+;+;+	2037	3662	2043	2164	2820	930	1126	3182	2533	3097	1166	3554	1958	0.148229052	5.43721654	1.388473487	0.259195793	0.531908799
FBgn0071547	XL_group1a	5726137	5731572	+;+	5273	15162	9071	8099	12012	4510	5955	15281	10205	9232	5854	14322	5390	0.070710652	7.464129106	0.399533291	0.537981985	0.765595274
FBgn0071548	XL_group1a	5732158	5733691	-;-;-	1384	955	580	453	1023	441	308	644	502	704	220	713	271	-0.415868772	3.379055448	6.645394416	0.022530517	0.134350669
FBgn0071550	XL_group1a	5684586	5685982	+	1397	507	226	191	243	134	124	307	305	393	158	330	147	0.181805312	2.241906626	0.70408451	0.416155388	0.674751896
FBgn0071553	2	26295849	26298952	+;+;+	2943	842	651	480	880	429	203	952	568	669	367	935	269	0.03539963	3.455685203	0.043004739	0.838839368	0.928692431
FBgn0071555	XL_group1a	7922233	7925622	+;+;+;+;+	3090	2873	1125	1547	2167	670	839	1649	1447	1900	742	2076	860	-0.177845352	4.765792802	1.199483237	0.292748738	0.565258018
FBgn0071556	4_group3	595148	597570	+;+	2342	18	9	36	21	3	1	17	6	10	73	20	11	0.758197259	-1.188233683	0.653147195	0.433124728	0.688591645
FBgn0071557	2	27949769	27953052	+	3284	5	283	325	123	17	199	29	34	24	50	102	19	-2.106396881	1.143211531	5.820046731	0.032956331	0.168706797
FBgn0071558	XR_group8	1319917	1334873	-;-;-;-;-;-;-;-	4163	1172	371	353	555	512	315	1491	1247	1732	1312	2097	391	1.46568864	4.170725199	38.23158724	2.91E-05	0.00210495
FBgn0071559	2	21176103	21194535	-;-;-;-;-;-;-	975	46843	36256	20613	33437	15988	20340	51805	27559	28622	19104	45631	20647	0.107037945	9.15357749	0.626741373	0.442362811	0.695831917
FBgn0071560	3	6671386	6673015	-;-;-;-	1104	64	42	16	18	6	16	35	14	112	8	12	11	-0.059197608	-0.861945517	0.00779463	0.930956213	0.970263547
FBgn0071561	3	17248357	17251615	+;+;+;+;+;+;+	2780	23563	19355	11894	21869	7838	9367	22185	12909	17300	8562	21763	7358	-0.136345004	8.124573679	2.807408699	0.117029715	0.345977341
FBgn0071562	4_group1	3661721	3663749	-;-;-	1294	3401	2433	1465	3763	1107	1198	3512	1771	3184	1187	3257	1035	0.004610527	5.336931483	0.001481124	0.969869017	0.986458881
FBgn0071565	2	12543666	12544863	-	1198	1990	1834	1108	2396	830	1580	2328	1316	2175	784	1996	620	-0.226674272	4.880534975	1.378099729	0.260898257	0.534085805
FBgn0071566	2	4105786	4107045	+	1260	799	859	442	782	479	283	772	468	772	338	960	277	-0.153761744	3.479542926	0.764328888	0.397398716	0.660861812
FBgn0071567	XR_group6	1719153	1720958	+;+;+	1479	2210	1385	1276	2510	623	656	1575	1528	1636	527	1681	967	-0.257614759	4.648526738	3.447253521	0.085507335	0.28947438
FBgn0071568	3	11574886	11578863	+;+;+;+;+;+	3659	4520	2871	2097	4149	1237	1709	3304	2285	2410	1161	2870	856	-0.419524382	5.469814858	11.95934469	0.004079476	0.049902119
FBgn0071569	4_group3	11671165	11672818	+;+	1597	2020	1662	1218	2110	737	668	2219	1307	2242	822	2011	661	0.02820563	4.728194138	0.052254383	0.822642717	0.921186705
FBgn0071570	2	7524674	7525518	-;-;-	723	6137	4213	3429	4349	2140	1993	7212	3904	4561	2596	6802	2699	0.223173982	6.258413611	4.030306155	0.065325761	0.247469552
FBgn0071571	2	5514156	5516191	+;+;+;+;+;+	1722	1151	901	508	1197	463	412	1073	711	1000	409	1092	373	-0.056663365	3.813286137	0.234096687	0.636325533	0.824448737
FBgn0071572	2	14280769	14285827	-;-;-;-;-;-	1801	0	43	123	57	74	49	0	140	28	13	87	57	-0.952464384	0.341584825	0.619712961	0.446602228	0.698499003
FBgn0071574	2	26504306	26505795	-;-;-;-	1309	669	775	337	834	266	253	1380	784	1094	525	1459	551	0.817976179	3.743162086	31.5598892	7.52E-05	0.004028382
FBgn0071575	XR_group8	1789058	1793106	+;+;+;+;+;+	3731	3290	3171	1893	2880	1534	1584	3507	2271	1981	1352	3168	1147	-0.195222427	5.442749621	2.210747068	0.16023466	0.410796169
FBgn0071576	3	9423523	9424779	-	1257	2144	1842	407	2096	751	935	2668	1552	2075	1145	2967	1040	0.559115492	4.888801108	6.558479388	0.023271367	0.1370985
FBgn0071578	2	5483162	5484400	-;-;-	1114	9298	9734	2995	5193	2504	1803	5017	3128	4020	2177	5234	1218	-0.621093986	6.267185865	6.583732669	0.024035746	0.139310579
FBgn0071580	2	10650224	10650834	-;-;-	488	7122	6663	3982	6841	2976	2804	8522	4307	5860	2772	7656	2545	-0.060607247	6.555371775	0.382017106	0.546903194	0.770314314
FBgn0071581	XR_group8	1255019	1259385	+;+;+;+;+;+;+;+;+	3327	2626	2014	1402	3213	988	1042	2607	1974	2148	1074	3060	1410	0.058747774	5.174264591	0.272768503	0.610019483	0.810874844
FBgn0071582	4_group4	465192	468524	-	3333	1070	643	437	1556	574	377	1053	1461	708	571	1507	1470	0.556650206	4.228473594	2.16838855	0.166175432	0.418487408
FBgn0071584	2	10669151	10677338	+;+;+;+;+;+;+	3276	143	158	60	230	53	24	147	68	160	44	146	29	-0.23710429	0.862639611	0.442176657	0.51737219	0.751151182
FBgn0071585	4_group3	3402303	3431439	+;+;+;+;+	4031	631	290	889	829	732	185	1051	492	705	360	733	336	-0.190454319	3.56012306	0.249226606	0.626413776	0.819319541
FBgn0071587	2	18969747	18973559	-	3813	1291	932	766	1355	547	515	1502	1487	1256	744	2084	932	0.483325595	4.388188463	11.48159675	0.004673159	0.053696235
FBgn0071588	4_group4	337818	339290	+;+	1405	894	673	469	995	297	200	662	725	810	288	979	465	0.046597822	3.49284468	0.081424728	0.77974545	0.899687439
FBgn0071589	3	14404654	14418632	-;-;-;-;-;-;-;-;-;-;-;-;-;-;-;-;-;-;-;-;-;-;-;-;-	6780	134	80	13	110	11	23	372	132	110	95	114	82	1.567710756	0.909935288	12.17094985	0.003844736	0.048114844
FBgn0071591	2	16467070	16468345	-;-;-	1080	208	291	151	279	74	95	343	188	315	99	327	187	0.23402138	1.96926604	1.387782618	0.259308709	0.531908799
FBgn0071593	XR_group6	181083	183605	-;-	2471	710	555	257	754	277	228	726	365	602	267	727	264	0.068979618	3.106119949	0.209595268	0.654431184	0.833547029
FBgn0071595	XR_group6	179473	181065	-;-;-;-;-	1128	3178	2667	1614	3386	1220	1129	1085	1093	1343	1408	1146	447	-0.854225696	4.971999501	13.61724956	0.00267923	0.038166688
FBgn0071596	XR_group6	2159638	2162763	+;+;+;+;+	2557	9189	7008	4803	10340	3941	4173	8492	5492	7974	3491	8391	2162	-0.214340498	6.84413702	3.382785544	0.088172059	0.294314327
FBgn0071598	3	16038106	16039907	-;-	1738	21401	8310	7956	17713	4492	9008	13362	8402	11020	6302	13311	3401	-0.267220215	7.557620376	2.430375416	0.142337399	0.385774014
FBgn0071599	XL_group1a	6584138	6587371	+;+;+;+;+;+;+;+;+;+	2593	5	4	8	6	6	12	21	21	13	10	36	4	1.019646437	-1.921415111	2.569051737	0.132309571	0.370343012
FBgn0071600	XR_group8	1354718	1356162	-	1445	19585	12751	9126	14050	7260	8887	16248	8773	8518	6536	15443	5369	-0.286835567	7.696574226	5.506925476	0.034940298	0.174272089
FBgn0071601	4_group3	7277711	7278705	+	995	98	43	52	163	35	39	107	111	138	48	153	84	0.506969647	0.738152654	2.468313147	0.139503108	0.381125009
FBgn0071602	XR_group6	606525	611053	+;+;+;+;+;+	3930	1896	1281	750	1527	549	615	1489	899	1247	628	1592	520	-0.077798848	4.290839643	0.545968896	0.472733537	0.718130916
FBgn0071603	4_group2	896804	902472	+;+;+;+;+;+;+;+;+	2335	1494	1515	718	1467	443	684	1208	968	1179	537	1569	591	-0.158975394	4.240210528	1.263246769	0.280798946	0.553421111
FBgn0071604	XR_group8	8341602	8346260	+;+;+	4306	851	1027	738	1284	489	441	821	563	863	397	859	287	-0.472408108	3.74850821	9.183856551	0.009389231	0.079764876
FBgn0071605	2	19391912	19393256	+;+	1288	261	291	211	409	154	105	309	251	257	110	345	104	-0.215685529	2.104036419	1.229876383	0.286967408	0.560017316
FBgn0071606	2	29124017	29124905	-	889	9327	6411	5193	11734	3844	3328	7363	4320	5762	2660	7504	2001	-0.50554828	6.704047102	20.77156149	0.000500392	0.013147146
FBgn0071607	3	15941716	15942771	-;-	995	14592	16229	7066	18756	4695	6492	14500	8248	12803	6029	16604	6307	-0.127972007	7.637240771	0.849457453	0.373026688	0.640190134
FBgn0071608	3	15933951	15939090	-;-;-;-;-;-;-;-;-;-	4286	946	459	608	809	390	381	1136	678	1052	485	1132	391	0.32403476	3.710443192	4.148070282	0.061973315	0.240075826
FBgn0071609	XR_group6	457093	459550	+;+;+	2329	889	880	547	1020	410	344	1020	640	885	425	950	269	-0.05720893	3.655502859	0.165076211	0.690949072	0.851554
FBgn0071610	XR_group3a	1081005	1085354	-;-;-;-	4171	2433	2278	1388	1703	932	1122	1926	1245	1548	731	3006	571	-0.343723111	4.846405639	3.624204036	0.078676973	0.275977917
FBgn0071612	2	11986297	11988773	+;+;+	2351	5281	3954	2975	4877	1869	2153	4674	2667	3523	1892	4015	1667	-0.258290518	5.932159513	8.514535823	0.011686269	0.091182648
FBgn0071613	2	25931784	25932346	-	563	795	2837	1040	1126	654	515	1360	717	919	603	1964	483	-0.408415163	4.332601447	1.658672775	0.221328776	0.488642707
FBgn0071614	3	16034363	16035945	+;+;+;+	1374	1317	875	371	772	394	365	914	591	778	239	587	371	-0.282183276	3.523996726	1.834435282	0.198036822	0.458981664
FBgn0071615	2	26500405	26503298	-;-;-;-	2713	1420	1430	856	1591	698	510	1758	1296	2033	744	2081	663	0.261457773	4.513123213	3.848056039	0.070951592	0.26007101
FBgn0071617	3	15950439	15951725	+;+	1222	1762	1114	941	1685	375	327	1485	1177	1442	481	1841	689	0.08965024	4.280896441	0.326804831	0.577024858	0.789745978
FBgn0071618	3	15943675	15948295	+;+;+	4505	742	767	362	508	238	49	865	614	580	362	916	254	0.407183007	3.204559839	1.430175717	0.253376633	0.526086293
FBgn0071619	3	15939154	15939981	+	828	2356	2732	1235	2826	1065	1096	2969	1673	1781	634	2188	967	-0.307287963	5.026237958	3.646227779	0.077873574	0.274407194
FBgn0071620	3	15926743	15935239	+;+;+;+;+;+;+;+;+;+;+;+;+	3074	14	8	12	0	4	1	13	0	24	24	20	10	1.269981355	-2.014196893	1.809504455	0.200925084	0.462537101
FBgn0071621	2	10590405	10614933	-;-;-;-;-;-;-;-	3569	7	10	6	2	5	2	45	24	30	25	34	20	2.366685029	-1.442821892	19.22327071	0.000691211	0.016321247
FBgn0071622	3	7954046	7955032	-;-	923	1670	691	476	1082	459	1027	838	675	1004	430	776	330	-0.363185776	3.920730751	1.939259595	0.186459726	0.442956477
FBgn0071625	3	14086905	14087831	+	927	12	108	269	24	2	7	18	237	659	2	324	311	0.603154777	1.679015995	3.061541207	0.10305146	0.321534814
FBgn0071627	3	13542536	13543455	-;-;-	735	2791	1702	1411	2326	931	840	2003	1310	1824	873	2404	675	-0.2133997	4.849640216	3.999334535	0.066243123	0.2496923
FBgn0071628	2	29102009	29102741	+;+;+	605	2022	1980	1036	2232	795	1064	1686	1077	1501	620	1876	478	-0.464883261	4.64047057	11.28428689	0.004947129	0.0552536
FBgn0071629	2	11366869	11370424	-;-;-;-	1866	30904	25443	15817	27110	9934	11699	30552	18056	19607	10818	32375	12007	-0.06169985	8.534742108	0.400894927	0.537300138	0.76555366
FBgn0071631	2	17409283	17410512	+;+	1169	724	322	839	1149	680	614	1331	813	1117	451	1287	432	0.073831365	3.968867304	0.058008874	0.813469195	0.916424182
FBgn0071634	XR_group6	8825333	8827377	+	2045	23705	21355	12089	21594	7716	12475	24050	13876	13302	9685	27161	7682	-0.135271601	8.221688865	0.880413708	0.36471877	0.631865023
FBgn0071636	3	390981	400113	+;+;+;+	1554	706	431	406	490	261	162	513	391	533	168	567	255	-0.193785815	2.902936624	1.309832445	0.272486851	0.545456505
FBgn0071637	3	14036138	14048106	+;+	2361	4574	2481	1657	3618	1155	1400	3393	2944	2940	1874	5017	2398	0.352602314	5.686086307	4.714624778	0.048442712	0.208034535
FBgn0071638	3	17304934	17314682	+;+;+;+;+;+;+;+;+;+;+;+	6587	868	732	427	773	510	253	829	535	792	251	732	322	-0.187095487	3.440332317	0.954909465	0.345811434	0.614880354
FBgn0071639	3	1822489	1823121	-;-;-	506	893	598	703	1065	345	352	1027	570	851	366	1127	470	0.00963518	3.680205739	0.004679779	0.946471933	0.976456398
FBgn0071640	3	11078838	11079686	-;-	789	512	587	242	717	237	262	576	435	515	238	697	179	-0.037447559	2.975585316	0.044851838	0.835468741	0.927407558
FBgn0071641	3	14700299	14701900	+;+;+;+	1422	287	5523	24	4	8	5	393	136	107	90	4141	2756	0.100612045	4.38720432	0.004945954	0.945259181	0.975930994
FBgn0071642	Unknown_group_155	11540	12768	+;+;+;+	1037	2057	1474	1012	1989	770	630	1301	979	1214	556	1630	661	-0.39556466	4.446736873	13.53669882	0.002656146	0.03798521
FBgn0071643	3	13734544	13737015	+;+;+;+;+;+;+	2067	11472	11269	6322	11536	4584	4745	13892	7842	7335	4815	12693	4345	-0.056665143	7.262990488	0.24789851	0.626641789	0.819398857
FBgn0071646	XL_group1a	7948465	7949184	+;+	643	281	275	207	317	109	127	361	207	396	160	402	110	0.17119386	2.169155306	0.843868068	0.374556792	0.641529517
FBgn0071647	3	14102612	14103635	-;-;-;-;-	619	2494	1642	1029	1936	605	680	1847	1211	1310	340	2057	746	-0.362298129	4.54130366	4.404927484	0.055346344	0.225672335
FBgn0071648	3	14092939	14093862	-	924	3	90	4	4	0	0	2	11	26	2	61	8	-0.500781278	-1.571561469	0.257045947	0.620409542	0.816740841
FBgn0071649	3	14091803	14092858	-	1056	0	31	23	8	0	0	38	37	89	0	70	56	1.778299738	-0.801736992	5.561651388	0.034184196	0.172165321
FBgn0071650	3	14089604	14090590	-	987	0	24	172	62	2	8	30	83	117	5	30	58	-0.095727937	0.021790876	0.017468907	0.89681682	0.953774469
FBgn0071652	3	14055452	14057420	-;-;-;-;-;-	1476	14622	10714	9168	10594	7406	3711	13240	11075	9437	6218	14333	7664	0.061217952	7.551825994	0.105111663	0.750858799	0.885985633
FBgn0071653	2	17406268	17407482	+;+;+	1098	535	702	359	747	299	237	746	461	597	242	711	199	-0.114551519	3.141719247	0.461200206	0.508641771	0.745211001
FBgn0071654	3	11072581	11074709	-;-;-;-	1606	828	436	262	699	228	195	531	372	462	246	592	220	-0.061893785	2.924940773	0.163972158	0.691925221	0.852466848
FBgn0071655	3	18736464	18738815	+;+	2288	2381	1408	1062	1284	552	1090	1287	901	1359	693	1320	497	-0.407265847	4.440932715	4.639176601	0.050025634	0.212103489
FBgn0071656	4_group1	217179	218798	-;-;-;-	1246	1759	1508	1100	2543	638	699	1794	1268	1974	819	2160	682	0.001896165	4.667015594	0.000215231	0.988511363	0.994798563
FBgn0071657	4_group1	2217556	2220147	+	2592	3833	2974	2285	4396	2178	1798	3225	2177	2520	1121	3295	821	-0.54693949	5.568709097	16.11412945	0.00139375	0.025118545
FBgn0071660	XR_group5	156957	158459	+	1503	1556	957	914	1866	541	464	1650	1275	1747	707	1574	745	0.243827307	4.407883001	3.26545522	0.093284104	0.303449004
FBgn0071661	4_group4	1471094	1471767	+;+;+	517	1380	1061	529	1087	567	467	1719	814	1469	596	1525	480	0.308208645	4.136573753	4.937835672	0.044095447	0.198111487
FBgn0071662	2	13460977	13464010	+;+	2799	64	194	21	89	25	340	94	38	73	16	37	4	-1.669214781	0.892656087	3.893829106	0.071057432	0.260359455
FBgn0071663	4_group4	677502	680242	-;-;-;-;-	2204	1484	981	925	1982	507	719	1466	1134	1825	743	1898	538	0.118225445	4.426311652	0.551754734	0.470443166	0.715925685
FBgn0071664	4_group4	668612	676790	-;-;-;-;-;-	1268	7646	6996	3715	7146	2670	3065	8664	5156	6704	3111	7732	2952	0.055806457	6.635454935	0.359777758	0.558651663	0.77801223
FBgn0071665	3	7145153	7146185	+;+;+;+	851	8950	7421	6395	7029	3252	2954	12120	7606	7851	3241	9918	3358	0.104349208	6.91413332	0.625421761	0.442832853	0.69619847
FBgn0071666	Unknown_group_18	19695	22161	-;-;-;-;-	1137	95	81	0	320	58	101	514	106	145	38	228	74	0.99437332	1.315150243	1.428093151	0.254810278	0.5275442
FBgn0071667	XR_group5	165658	172217	+;+	6499	2232	1642	1389	1978	775	750	2194	1642	2172	759	2399	794	0.017629774	4.819762403	0.029890224	0.865327588	0.940547923
FBgn0071668	XL_group1e	593673	596170	+;+;+;+;+	1652	675	471	391	743	243	271	630	527	584	280	763	480	0.141734697	3.251734932	0.73455809	0.406499545	0.667165053
FBgn0071670	Unknown_group_286	4011	14232	+;+;+;+;+;+;+	2983	5376	2019	1816	2214	1103	1468	2133	1716	1596	914	2316	972	-0.528232605	5.178185278	7.758861822	0.015108711	0.105416454
FBgn0071671	2	5274683	5275681	-	999	150	52	136	171	47	47	105	144	103	8	187	151	-0.483713636	1.053404874	1.051504367	0.323343845	0.59332222
FBgn0071675	3	13342055	13357414	+;+;+;+;+;+;+	4488	3943	2042	1786	3193	996	1152	3037	2420	2807	1293	3312	1699	0.120932538	5.39999319	0.969657	0.342238617	0.611789017
FBgn0071679	2	3890854	3894316	-;-;-;-;-;-;-;-	2859	2042	1457	438	1340	587	651	1343	835	971	546	1345	357	-0.215244834	4.156809611	1.4674715	0.246706863	0.516995821
FBgn0071683	4_group5	929352	940205	+;+;+;+;+;+;+;+;+;+	3086	1259	907	448	1139	594	358	1477	769	1072	513	1289	469	0.23519322	3.961768919	2.643955978	0.127256399	0.362187939
FBgn0071684	4_group5	898804	899963	-;-	1074	5668	4858	2449	4416	1960	2069	4892	2484	2402	1810	4370	2000	-0.279867826	5.925499332	3.594305164	0.079783652	0.277810051
FBgn0071685	4_group5	1376428	1377481	+	1054	23588	19165	10642	19604	6522	7461	23077	11804	12850	8066	22424	8625	-0.044312035	8.028302763	0.130727747	0.723324471	0.871347319
FBgn0071686	XR_group3a	1297771	1305457	-;-;-;-;-;-;-;-	4354	5293	3636	2410	4702	1662	1531	4305	3455	4367	1920	4981	1518	0.043788113	5.896965038	0.177252772	0.680429308	0.846291682
FBgn0071688	3	11122298	11122958	-;-	594	2070	1331	1206	2430	971	996	1865	919	1534	736	1477	439	-0.440709371	4.627638759	10.32004443	0.006585437	0.064609424
FBgn0071689	3	16925026	16964542	+;+;+;+;+;+	3552	395	183	135	133	80	63	293	259	263	127	306	149	0.499447257	1.865471387	3.655142806	0.077551171	0.273740484
FBgn0071692	4_group4	4767683	4769054	+;+;+;+	1182	2058	2294	964	2021	1063	609	2284	1433	1720	755	2013	554	-0.143239911	4.740857222	0.648818936	0.434617481	0.689354083
FBgn0071695	4_group4	5206161	5217803	+;+;+;+;+;+;+;+;+;+;+	4410	2735	15743	665	915	595	992	2030	1536	1516	1009	2645	862	-1.137555649	5.524786643	2.552669741	0.139103668	0.380733427
FBgn0071696	XR_group3a	1288659	1291063	-;-;-;-;-	1847	61	137	155	73	10	2	41	240	382	15	251	241	0.595032252	1.366295527	2.188893113	0.162165917	0.413187937
FBgn0071699	3	14589301	14590473	+	1173	1473	1883	1417	2092	1486	1739	2378	1322	904	738	2017	735	-0.52675476	4.919687291	3.832327948	0.07253546	0.264152813
FBgn0071701	XL_group1e	4163422	4164866	+;+	1243	153343	65990	66758	94505	43220	53227	118911	57846	61945	52070	111499	45710	-0.079485785	10.48787683	0.260625965	0.618008778	0.815250764
FBgn0071709	2	15669531	15670217	+;+	572	3435	2128	925	1881	713	930	2464	1292	2312	906	2365	865	0.026905749	4.903691675	0.024901235	0.876970118	0.945798976
FBgn0071711	2	12906065	12928291	+;+;+;+;+;+;+;+;+;+;+;+;+;+	3824	33	221	35	144	59	18	147	142	119	43	138	60	0.1671601	0.835705834	0.123292859	0.730957683	0.875587268
FBgn0071713	XL_group3a	2037063	2135833	-;-;-;-;-;-;-;-;-;-;-;-;-;-;-;-;-;-;-;-;-;-;-;-;-;-;-;-;-;-;-;-;-;-;-;-;-;-;-;-;-;-;-;-;-;-;-;-;-;-;-;-;-	16240	5134	3553	2406	4073	1403	886	3332	3155	2962	1652	3478	2426	-0.011528807	5.727026277	0.003703621	0.952372473	0.979026858
FBgn0071714	XL_group1e	2137726	2138913	+	1188	2488	1285	1187	2765	1045	1227	2681	1495	1215	1105	3097	1357	0.128639933	5.037060959	0.385975292	0.544862474	0.769592059
FBgn0071715	2	13814949	13821494	+;+	6480	637	180	231	417	107	181	274	371	363	165	404	180	0.029285993	2.42384904	0.012204037	0.913675072	0.962014895
FBgn0071717	XR_group6	6467221	6476650	+;+;+;+;+;+;+	3503	27	54	12	72	40	5	71	26	34	12	46	62	0.121546395	-0.378598652	0.034799691	0.85481487	0.936007306
FBgn0071718	3	4428462	4430978	-	2517	35738	23055	24973	48691	5349	10540	45067	53916	64285	15875	61245	32569	0.707374084	9.290700174	12.26489226	0.003846043	0.048114844
FBgn0071719	XL_group1e	9798667	9800298	-;-	1570	0	7	0	80	0	5	4	6	25	44	16	2	0.728751012	-1.604414358	0.389262653	0.543382666	0.768517741
FBgn0071721	4_group4	3140886	3141539	-;-	585	7444	6402	4451	7128	2998	3387	10875	5405	6221	3586	10180	4494	0.244445144	6.804903574	4.094397106	0.063475145	0.24366426
FBgn0071722	2	7962939	7964001	+	1063	12359	9451	6513	13154	5564	5993	9472	5085	6008	3667	9659	3828	-0.558696462	7.149307112	26.61784621	0.000167546	0.006668688
FBgn0071725	XR_group6	4262965	4264351	-;-;-	1265	62	0	14	10	7	0	61	30	25	24	39	24	1.457350775	-1.070732236	2.809797604	0.116887888	0.345906187
FBgn0071728	XR_group8	9087459	9105065	-;-	1764	22	18	0	48	2	3	2	0	0	4	2	4	-2.239536375	-2.437851182	4.113381345	0.062939036	0.242049128
FBgn0071729	XL_group1e	924962	930487	+;+;+;+;+;+	2201	2566	2644	2321	3858	1795	1698	3237	4498	2867	811	3435	1485	-0.186423632	5.61770799	0.550348107	0.471542194	0.716855419
FBgn0071730	XL_group1e	953855	957065	+;+;+;+	1551	7380	4109	3763	7116	1873	2316	6125	4704	5565	2316	7748	4449	0.128042352	6.456525981	0.764941447	0.397214771	0.660839753
FBgn0071731	XL_group1e	976845	985542	+;+;+;+;+;+;+;+;+;+;+;+;+	3393	10	65	10	6	2	28	120	49	35	38	99	69	1.544046599	-0.178128141	4.74416362	0.047839194	0.206955595
FBgn0071732	XL_group1e	6524489	6528132	+;+;+;+	3293	5993	4004	2613	4354	1666	1714	5370	3516	4801	1751	5891	1842	0.07412462	6.011274089	0.505836992	0.489161111	0.73055819
FBgn0071733	XL_group1e	6543648	6545276	+;+;+;+	1245	11314	10286	5917	9920	4754	4890	12676	6950	8263	4472	12522	4355	-0.045565687	7.207617634	0.201061185	0.661041278	0.837128133
FBgn0071736	XL_group1a	5776982	5780678	-;-	3643	37	18	21	23	10	6	51	9	51	19	32	13	0.542814959	-1.096066217	1.356115636	0.264556192	0.538524921
FBgn0071737	XL_group1e	4891513	4899098	-;-;-;-	2334	22	8	0	8	4	0	2	0	3	15	12	0	0.188482445	-2.756117505	0.032621702	0.859377079	0.937926072
FBgn0071738	XL_group1e	6806013	6845183	+;+;+;+;+;+	2442	98	108	31	77	48	21	77	109	165	29	114	16	0.184257254	0.426583083	0.166831765	0.689404766	0.851099168
FBgn0071743	2	3402580	3403642	-	1063	1780	634	978	940	169	299	631	573	940	57	910	287	-0.987899406	3.544893571	7.125639596	0.019676306	0.123287503
FBgn0071748	2	26771755	26773941	-;-;-;-	2020	20786	15730	12214	20334	9491	9618	22662	13397	13467	8281	23449	8752	-0.07772683	8.112844473	0.504228778	0.489839993	0.73105172
FBgn0071749	XL_group1a	1131957	1139859	+;+;+;+	2603	2980	1993	1757	2384	898	779	2089	1716	1922	779	2481	1209	-0.209990049	5.002387372	3.52165882	0.082551588	0.283610566
FBgn0071750	XR_group8	8399687	8403277	+;+;+;+;+;+	3267	1834	1548	1144	2422	687	803	1467	1240	1446	816	1514	389	-0.325251868	4.548293219	4.026379307	0.065441228	0.247653414
FBgn0071751	2	24919855	24929704	-;-;-	3560	325	208	53	219	89	87	263	310	339	83	409	122	0.554859141	1.885529908	2.9580315	0.108484472	0.332138173
FBgn0071752	2	24902822	24906907	-;-;-;-;-;-;-;-;-	3087	435	244	298	611	173	123	530	432	516	223	767	251	0.42391878	2.787365531	4.995405643	0.043050153	0.195259118
FBgn0071756	2	21829719	21831451	-;-	1670	1080	809	550	1644	501	630	1416	636	1092	451	1272	295	-0.093862801	3.962159792	0.285764406	0.601718443	0.806482823
FBgn0071757	2	21822050	21838173	-;-;-;-;-;-;-;-	2632	3812	2842	2508	3803	1525	1223	3810	1932	3648	1308	3373	706	-0.240883555	5.507664289	1.83524833	0.197943532	0.458910285
FBgn0071760	2	25816125	25820772	-;-;-;-;-;-;-	2653	1075	600	337	599	89	76	358	454	301	150	580	271	-0.371206699	2.807167978	1.074509749	0.318697005	0.589583438
FBgn0071761	XL_group1a	4234720	4250191	+;+;+;+;+;+;+;+;+;+;+;+;+;+;+;+;+;+	4387	3250	1905	1591	2812	999	895	2797	2248	2625	1366	3342	1290	0.229630519	5.254370677	4.846620767	0.045813746	0.202459141
FBgn0071764	4_group3	2608320	2612394	+;+;+;+	2643	104	81	150	127	33	30	106	98	174	43	232	121	0.22741456	1.030271609	0.739263024	0.405039921	0.666777741
FBgn0071765	XR_group8	602306	611616	-;-;-;-;-;-	5276	1198	890	528	994	397	488	1517	564	997	629	1022	435	0.201425714	3.893943014	2.039810637	0.176154309	0.430766125
FBgn0071767	XL_group1e	12192807	12194616	-;-;-	1681	482	281	282	527	139	192	484	265	575	247	514	189	0.213116291	2.671773457	1.345774148	0.26630085	0.539669426
FBgn0071770	4_group4	2552157	2552936	+;+	718	7322	6529	3971	8284	2893	3030	9509	4729	5946	3199	7699	2872	0.016011508	6.64276263	0.029925174	0.865249717	0.940547923
FBgn0071772	4_group4	26212	66767	+;+;+;+;+;+;+	4433	135	32	17	69	3	24	59	84	42	35	70	36	0.563244893	-0.111585408	1.007718078	0.333260495	0.602269148
FBgn0071778	XR_group3a	1356025	1366653	-;-;-;-;-;-	978	21365	10964	10689	19296	6342	6314	16054	11557	18019	5845	19792	6663	-0.065668849	7.832395806	0.333608783	0.573133947	0.786600521
FBgn0071785	Unknown_group_658	31690	32560	-	871	552	443	340	784	216	310	916	730	978	338	1192	500	0.653291181	3.475494996	17.12799311	0.001099572	0.021823535
FBgn0071786	XR_group8	8411985	8413542	+;+;+;+	1015	1473	1425	1086	1869	753	618	1858	1111	1728	608	1768	715	-0.060847632	4.520994584	0.269735906	0.611993097	0.811931182
FBgn0071789	XL_group1e	7377239	7378343	+;+	650	400	210	254	460	126	132	118	555	386	149	226	395	0.094448705	2.506353167	0.050558235	0.825591015	0.922172067
FBgn0071791	XL_group3b	28297	28952	-;-	582	462	251	170	409	69	105	290	211	254	80	428	166	-0.153847017	2.075488205	0.405010802	0.535249032	0.763709933
FBgn0071794	XL_group1e	11714512	11716815	+	2304	91	67	36	56	25	28	244	55	109	59	89	34	0.897472305	0.423557725	7.857848296	0.014599712	0.103537409
FBgn0071795	XL_group1e	6963202	6970905	+;+;+;+	1403	220	71	85	208	60	34	155	113	67	79	168	38	-0.003848127	0.961041073	0.000152158	0.990340202	0.995832298
FBgn0071796	XL_group1a	6978650	6998682	-;-;-	1161	119	40	27	60	1	40	95	99	154	24	107	51	0.734326474	0.293878532	1.457868016	0.248181577	0.519015069
FBgn0071798	XR_group8	6190481	6314816	+;+;+;+;+;+;+;+;+;+;+	5673	560	206	180	325	83	67	357	357	202	120	322	317	0.291050574	2.250750092	0.726636768	0.408975552	0.669336297
FBgn0071799	4_group3	1817731	1965483	-;-;-;-;-;-;-;-;-;-;-;-;-;-;-;-;-	6776	5246	2379	2160	2746	1622	1014	3261	2811	3151	1650	3964	1892	0.131639432	5.620085376	0.557960368	0.468007472	0.714365594
FBgn0071802	XR_group8	8420302	8420929	+	628	57	27	2	20	12	29	58	13	45	18	60	4	0.654367006	-0.890692919	1.096384316	0.313608927	0.585646045
FBgn0071803	XL_group1e	6677789	6678620	+	832	1143	905	461	918	436	368	930	527	567	268	884	421	-0.320682223	3.58423695	3.996037995	0.066341668	0.2496923
FBgn0071808	XL_group3a	2308573	2309079	+;+	434	6069	8150	2683	5841	2560	2759	9449	4606	4642	2679	8240	2985	0.106130554	6.516645742	0.330057601	0.575188722	0.788114261
FBgn0071809	XL_group3a	2251293	2253949	+;+;+;+	2310	2269	3053	1306	2768	1357	2545	4638	3299	2822	2470	4919	2060	0.539968477	5.768011238	4.562150467	0.052825363	0.219529573
FBgn0071810	XL_group1e	9551002	9553474	-;-;-;-;-;-;-;-	2057	3887	3407	1973	4488	1442	1759	4058	2112	2461	1452	3110	1175	-0.277111551	5.57787606	7.021341157	0.019627596	0.123087318
FBgn0071813	XL_group1e	7531344	7534555	+;+;+;+;+	2936	739	735	514	839	269	300	806	499	621	356	879	144	-0.153527035	3.331649463	0.610762532	0.44810981	0.699626745
FBgn0071814	XL_group1e	7534429	7542177	-;-;-;-;-;-;-;-;-	3112	3035	1017	1386	2284	945	806	1548	2853	2537	438	2196	1506	-0.089694002	4.988147863	0.080735587	0.780959113	0.900044904
FBgn0071815	XL_group1a	8009523	8027115	-;-;-;-;-;-	3280	15	15	2	16	3	0	23	34	47	23	93	2	2.138498107	-1.255051718	7.843005469	0.014674747	0.103602361
FBgn0071816	XR_group8	3916830	3919095	+;+;+;+;+;+	1943	5871	4779	3041	5532	2212	2493	5144	3472	3400	1833	5018	1820	-0.301671901	6.09831369	10.4740655	0.00628577	0.062887675
FBgn0071819	XL_group3a	1404338	1406288	+	1951	6	10	18	15	4	8	0	0	12	21	13	0	-0.491454496	-2.21529038	0.224934377	0.642952547	0.828119272
FBgn0071824	XR_group8	8421295	8433581	+;+;+;+;+;+	4471	20	45	20	47	4	30	133	56	46	71	125	30	1.397069002	-0.004402252	8.623644734	0.011270672	0.089283904
FBgn0071825	XL_group1a	8581480	8583534	-;-;-	1812	1515	870	627	1282	469	303	941	1151	872	552	1274	1411	0.310464615	4.188323021	1.053495758	0.32365946	0.593657192
FBgn0071827	XR_group6	4042865	4051719	-;-;-;-;-;-;-;-;-	5109	3872	3174	2164	4170	1285	1233	4388	2701	3749	2117	4544	1558	0.239573728	5.722460668	5.027518932	0.042479804	0.193511065
FBgn0071828	3	12350983	12352587	+;+;+	1486	547	308	232	446	337	188	567	417	667	237	726	207	0.357109765	2.913760351	2.721422133	0.122278223	0.35431079
FBgn0071830	XR_group6	9836862	9838609	+;+;+;+;+;+	1373	10232	7325	6385	10580	4446	5212	10810	5782	7815	3412	9686	3129	-0.270187299	7.029251437	6.242438814	0.026216674	0.146571868
FBgn0071831	XR_group8	3323799	3325737	+;+;+;+	581	11561	7163	5266	9675	3111	3303	9387	6414	9974	2802	11055	4113	-0.026590901	6.954365257	0.062370993	0.806580426	0.912023307
FBgn0071833	3	18655755	18656573	+;+;+	713	128	86	39	137	51	25	109	64	98	88	202	32	0.464629309	0.686153848	2.113810935	0.169028256	0.42227811
FBgn0071834	2	21220397	21223074	-;-;-;-;-;-;-	1870	5061	1836	1624	3158	1058	1783	4312	2392	2696	1307	3429	1561	0.126590331	5.511874035	0.514408519	0.485570307	0.728082807
FBgn0071836	XR_group6	12187075	12192517	-;-;-;-;-;-;-	2152	6321	4249	4722	7496	2377	2532	5713	5691	5895	2582	8467	2944	0.021882602	6.495396536	0.033612737	0.857282203	0.937100137
FBgn0071838	3	289418	290104	+;+;+	558	726	828	428	1236	314	299	1109	619	1089	432	1103	390	0.243343577	3.676047653	2.193624011	0.161745373	0.412498345
FBgn0071839	2	22348062	22352421	+;+;+;+;+;+;+;+;+;+;+;+	3565	20288	18486	9145	20342	9236	9118	26026	15772	15127	10331	25870	9793	0.207806544	8.19197197	3.201254824	0.096233117	0.30900214
FBgn0071840	3	11829835	11832416	+;+;+	2406	128	77	43	183	26	32	398	214	247	108	381	90	1.577928616	1.456504219	30.59178448	8.73E-05	0.004520144
FBgn0071842	XR_group6	8056786	8057958	+;+;+;+	897	1442	678	604	1205	445	452	1229	685	1258	479	1141	379	0.064442875	3.908147064	0.204578356	0.658296751	0.83573391
FBgn0071843	3	5920639	5924580	+;+;+;+	3624	896	1036	648	1000	559	513	868	490	817	284	897	381	-0.533325715	3.731174366	10.55251699	0.006139225	0.062226911
FBgn0071844	3	9693010	9695016	+;+;+;+;+;+	1702	1041	804	439	1396	316	543	1240	684	1005	370	1257	448	0.059696685	3.831819301	0.118180991	0.736358233	0.877948564
FBgn0071845	XR_group8	2299750	2301296	+;+;+;+;+;+	1198	1708	1497	858	2058	661	723	1304	1136	1665	670	1622	571	-0.170772548	4.465340955	1.687715375	0.215843987	0.482438083
FBgn0071847	3	1827995	1829140	+;+	1077	574	337	530	894	404	317	1050	465	835	379	930	323	0.225090945	3.451550711	1.076601591	0.317848212	0.588977628
FBgn0071849	3	6620344	6622188	+;+;+	1563	745	877	384	937	344	275	1113	642	701	391	871	208	0.0756227	3.483458452	0.167230044	0.689055745	0.85107743
FBgn0071850	XR_group6	2968915	2983135	-;-;-;-	2887	266	164	90	292	85	114	125	119	113	88	163	65	-0.464011083	1.401903923	3.929167749	0.068379002	0.25418436
FBgn0071851	3	5571178	5582238	-;-;-;-;-;-;-	4892	1271	1019	434	810	907	436	1409	751	1311	497	1386	328	0.132129721	4.032497007	0.286580344	0.601205506	0.806089581
FBgn0071852	3	5593874	5594700	-	827	3932	1700	2025	3844	1264	1295	3050	1803	1970	1005	3258	836	-0.318106262	5.27912147	4.750434262	0.047712225	0.206832778
FBgn0071853	XL_group1e	7820924	7823982	+;+;+;+	2843	1652	653	594	948	301	394	895	630	905	410	968	314	-0.123377502	3.688152937	0.505009593	0.489510179	0.730897648
FBgn0071854	XL_group1a	4807037	4810900	+;+;+;+;+;+;+	3483	2982	2435	1906	3784	1254	1441	3294	2450	2732	1444	3097	1327	-0.007923138	5.446806289	0.005696077	0.940955723	0.974667939
FBgn0071855	4_group4	6487983	6488806	-;-	691	14420	8231	6680	13742	4166	4277	12688	8331	12314	4166	14121	5534	0.050260911	7.336772548	0.251704008	0.62403167	0.818154552
FBgn0071856	3	2411696	2412112	-	417	0	0	42	1	0	0	2	317	78	173	595	345	5.436065756	1.452749131	14.34013948	0.002821929	0.03939702
FBgn0071857	3	9755700	9767670	+;+;+;+;+;+;+;+;+;+;+	5285	3875	2715	2676	4982	1577	1566	4107	4266	3837	1700	5606	2515	0.200946856	5.923616493	2.337817547	0.149558774	0.39630564
FBgn0071858	2	5300337	5302431	+;+;+;+;+;+	1807	1958	1096	771	1368	575	496	1293	719	1061	447	1356	332	-0.330755425	4.087929279	5.76071019	0.031591603	0.165002087
FBgn0071859	2	22537088	22541271	+;+;+;+;+;+	3879	3620	2755	1647	4059	1649	1248	3730	2505	2842	1558	3912	1044	0.025957411	5.528590711	0.054393336	0.819117822	0.919121664
FBgn0071860	4_group3	5491851	5519001	+;+;+;+;+;+;+;+;+;+;+;+;+;+	5054	2065	1844	1458	2007	710	973	2764	1827	1733	1280	3123	1228	0.314487393	5.029514513	5.096743243	0.04128042	0.189820141
FBgn0071862	2	26765198	26766683	-;-	1425	13009	11801	5553	11069	4397	4729	13256	6704	9018	4590	12038	4585	-0.072098678	7.250969182	0.438216573	0.519224047	0.752564516
FBgn0071863	3	11900539	11902246	+	1708	673	364	301	552	231	171	495	406	616	270	534	188	0.124862503	2.872912254	0.548561869	0.471704748	0.717028321
FBgn0071865	XL_group1a	8710391	8712704	-;-	2226	22	31	13	15	27	4	32	20	12	4	16	4	-0.588012013	-1.520180654	0.943853216	0.348525609	0.616573792
FBgn0071866	3	2753788	2754916	-	1129	610	324	322	627	193	168	514	356	546	205	485	275	0.036325351	2.821030006	0.04798455	0.829914448	0.924456086
FBgn0071868	2	6312963	6314904	-;-;-	1815	105	137	69	157	85	40	92	259	199	33	116	160	0.094202087	1.263539641	0.044075145	0.836877041	0.927778767
FBgn0071870	2	12408104	12441975	+;+	4086	126	91	132	145	177	42	316	159	233	59	144	80	0.18379436	1.454756173	0.193994692	0.666644671	0.838731164
FBgn0071873	2	5077898	5079182	+;+;+	874	711	599	330	424	229	160	508	326	459	198	504	178	-0.26116152	2.809011806	2.112881644	0.169115461	0.42227811
FBgn0071874	2	5024324	5075050	+;+;+;+	3652	1468	1954	1496	813	1249	598	2086	1451	1683	779	2314	700	-0.045403186	4.725891512	0.025327603	0.876081338	0.945186902
FBgn0071875	2	5069440	5070203	+;+	698	8	216	270	22	0	2	117	257	324	42	214	302	1.683544136	1.587933899	5.478518724	0.037130907	0.179921356
FBgn0071876	2	7475268	7491910	+;+;+;+;+;+;+;+;+;+;+	2704	335	95	282	143	135	75	185	235	198	20	215	275	-0.564243246	1.871321125	1.26406563	0.280775171	0.553421111
FBgn0071879	2	7309737	7311897	-;-;-;-;-	1830	1212	1459	915	1196	468	659	1093	604	760	408	1034	349	-0.628793381	3.984215735	16.74780838	0.00120059	0.022989646
FBgn0071880	2	7303963	7309142	-;-;-;-;-	4765	25966	20532	15702	23233	7815	10179	26868	16989	23734	10814	24960	7216	-0.00772508	8.335938527	0.004236225	0.94906775	0.977635353
FBgn0071883	3	13472818	13474999	-;-;-;-;-	1465	988	981	714	1519	488	496	1377	852	1055	465	1221	347	-0.090197079	3.990313943	0.390579146	0.542507257	0.767833101
FBgn0071885	3	2573569	2574592	-;-;-;-	832	310	189	265	235	50	22	210	235	308	12	232	318	-0.369377626	1.897481466	0.745254173	0.403193013	0.666154185
FBgn0071886	3	6558536	6562686	+;+	4076	313	182	97	150	153	30	523	351	601	282	507	227	1.477023784	2.400751144	19.93413976	0.000594751	0.014730364
FBgn0071887	3	1246911	1248138	-;-	1161	10597	8229	6415	9093	4293	4979	9643	5746	6117	4057	9406	3496	-0.272336902	7.007694423	6.366956304	0.025006907	0.142540732
FBgn0071888	3	1230464	1231771	-;-;-;-;-	1053	46	48	56	28	8	10	60	69	115	6	79	71	0.382892978	-0.066433205	1.137688245	0.30501042	0.577762533
FBgn0071889	3	1283675	1306225	+;+;+;+;+;+	4625	100	107	55	86	113	17	97	86	68	68	141	38	0.025180597	0.689757593	0.003667371	0.952605823	0.979026858
FBgn0071891	3	1243021	1243900	+;+;+	707	605	318	699	29	128	257	439	313	324	33	469	111	-0.87605506	2.54941854	1.984248574	0.18520993	0.441974176
FBgn0071893	3	1222039	1224105	+;+;+;+;+	1202	19	15	31	15	3	10	7	16	22	5	11	18	-0.605656627	-1.653442137	1.274020486	0.278846223	0.551978317
FBgn0071895	3	1214550	1216868	+;+;+;+;+	1020	586	114	139	257	135	79	234	420	248	126	450	299	0.487058061	2.267134855	1.393379913	0.258395786	0.531339121
FBgn0071898	3	1203240	1204683	+;+;+;+;+	1083	0	11	0	13	4	0	32	8	42	5	27	8	1.841610311	-1.997114482	3.792047997	0.072795759	0.264267923
FBgn0071899	3	1195047	1197856	+;+;+;+;+	1463	398	469	310	584	257	204	432	657	436	236	694	514	0.25367162	3.082239025	0.983476142	0.338938996	0.608285603
FBgn0071900	3	1176935	1178661	+;+;+;+;+	846	3892	3911	2082	5472	1633	1691	4366	4581	3732	1616	6017	3638	0.215844007	6.047854773	1.390376757	0.258885065	0.531782511
FBgn0071901	3	1172849	1175069	+;+;+	1171	5	184	102	16	6	1	19	78	694	4	304	317	0.864043315	1.459859142	2.001124728	0.180451569	0.436046758
FBgn0071902	3	10877891	10878500	+;+	550	2891	2348	1793	3699	1344	879	3640	1975	3152	1520	3546	1564	0.199068862	5.433311932	2.308461213	0.151944127	0.399427849
FBgn0071903	3	10838008	10839102	-;-	1036	156	63	51	82	54	65	221	135	254	162	273	163	1.456452157	1.45585649	23.84787246	0.000275094	0.009352572
FBgn0071904	3	1941966	1948251	+;+;+;+;+;+;+;+	5501	2887	3094	1263	2953	1222	1724	3122	2410	2562	1589	3037	1103	0.047678015	5.401325713	0.093128006	0.764933226	0.89241197
FBgn0071907	3	2755579	2757555	+;+	1898	558	239	467	276	136	129	601	322	391	325	566	234	0.379002313	2.737534684	1.846121826	0.196701304	0.457185006
FBgn0071909	3	5312085	5313589	-;-;-	1372	5961	4907	2888	5965	2181	2297	5120	2776	3857	1715	4744	1300	-0.403036322	6.038099811	15.59631612	0.00157854	0.027179395
FBgn0071910	3	5295800	5300182	-;-;-;-;-;-	2695	375	69	259	659	0	330	33	39	46	28	32	26	-2.96472548	1.5811112	10.69956665	0.007009072	0.067505695
FBgn0071911	3	5310439	5310998	+;+	486	2072	2217	1275	2548	752	827	2671	1713	2472	909	2657	815	0.081092079	4.961172535	0.445953041	0.515617481	0.750004042
FBgn0071912	3	5206278	5207547	-	1270	7243	6162	3461	5808	2821	2927	6537	4143	3572	3013	7169	2260	-0.132167157	6.415783113	1.070265998	0.319222984	0.589915605
FBgn0071913	3	5205369	5206254	-	886	16750	11522	8491	13370	6002	7113	14947	7756	7476	6047	15178	5309	-0.213008851	7.539857	2.897490589	0.11182426	0.337431873
FBgn0071915	3	5142843	5153975	-;-;-;-;-;-;-;-;-	10481	11648	12354	6179	11130	4332	3839	13031	9162	13895	5874	12693	4523	0.185272714	7.359632136	2.040905979	0.176046086	0.430766125
FBgn0071917	3	5267905	5272105	+;+;+;+;+;+;+;+;+;+	3635	6428	4610	3086	3527	1719	2325	4993	3403	3647	1993	5666	1867	-0.11392067	6.048401826	0.651238283	0.433782065	0.688872501
FBgn0071918	3	5138461	5141884	-;-;-;-;-	1488	707	664	472	987	207	160	551	466	650	124	668	435	-0.407238044	3.184576734	4.738279671	0.047958698	0.207282007
FBgn0071919	3	5123147	5126457	+;+	3255	30	209	247	309	46	199	166	67	98	42	102	38	-1.345909066	1.372858092	6.883877459	0.020724083	0.127781111
FBgn0071920	2	26741698	26743047	-	1350	16738	12853	7800	14407	6034	6931	20071	10934	12052	7713	20003	7879	0.228346521	7.782218554	4.896892315	0.044857133	0.200126585
FBgn0071925	2	3882642	3885952	+;+;+;+;+;+	2837	10697	8150	6261	11068	2425	4259	9914	6987	8730	3555	10148	3642	-0.100524503	7.004867256	0.695744486	0.418860816	0.676694253
FBgn0071926	2	3894381	3897943	+;+;+;+;+;+	3255	17783	16901	10627	19474	7553	8457	20884	12170	12760	8121	19294	6962	-0.09069351	7.955052675	0.858800739	0.370489727	0.637895542
FBgn0071927	2	3887476	3890918	+	3443	2884	2046	3033	2491	1041	979	1798	1331	1501	790	2159	774	-0.752327137	5.030331702	19.7006817	0.000624608	0.015213303
FBgn0071928	2	3885876	3887356	-	1481	685	534	351	728	293	357	969	599	1080	400	755	192	0.349922	3.400631436	3.053679476	0.103452299	0.322180643
FBgn0071930	2	3871915	3879305	+;+;+;+	1868	259	128	69	97	145	56	94	72	86	58	106	43	-0.613609235	0.995163092	3.374195522	0.088534642	0.295017019
FBgn0071931	2	3864011	3864804	+;+	733	354	268	284	426	108	140	250	144	218	112	290	157	-0.517099189	2.103181989	6.763074377	0.021570944	0.130752146
FBgn0071933	3	16241812	16249605	+;+;+;+;+;+;+;+;+;+;+	3128	919	726	631	1161	312	246	873	971	892	242	1072	582	-0.010398195	3.704503484	0.004311235	0.948619498	0.977373429
FBgn0071934	3	16250621	16253405	+;+	2719	1564	2763	782	2505	1082	866	3425	1707	2190	1343	3069	801	0.32170059	5.063575287	2.258437719	0.156223291	0.406271183
FBgn0071943	3	7146502	7238186	+;+;+;+;+;+;+;+;+;+;+;+;+;+;+;+;+;+;+;+;+;+;+;+;+;+;+;+	7360	155	199	147	232	135	81	293	175	225	147	324	120	0.313485285	1.832452194	1.84464829	0.196869058	0.457452877
FBgn0071944	3	7248453	7249491	+;+;+;+	640	5	70	7	56	9	7	45	56	85	60	116	38	1.459084066	-0.167401969	5.691896281	0.032460813	0.167222714
FBgn0071945	3	7197812	7199201	-;-	1279	33	14	17	38	11	19	30	16	46	13	82	15	0.374498384	-0.919134865	0.61915942	0.445074633	0.697780863
FBgn0071948	3	7249494	7250547	-	1054	259	295	194	420	164	132	412	276	526	159	522	174	0.305097585	2.428635522	2.490357092	0.137888378	0.378969803
FBgn0071949	XR_group8	4001847	4003333	+;+	1416	2286	2265	1482	3271	792	1072	3074	1865	1651	1016	2754	972	-0.054987682	5.08190398	0.154060383	0.700866524	0.857659276
FBgn0071950	3	7296951	7300980	-;-;-;-;-	3094	153	161	197	189	213	90	372	204	206	141	258	126	0.170236916	1.941076154	0.285782943	0.601706779	0.806482823
FBgn0071951	3	6984284	6988001	+;+;+;+;+	1724	2	0	16	20	0	2	7	0	17	1	3	2	-0.782699452	-2.825196256	0.545871204	0.472772372	0.718130916
FBgn0071953	3	6975876	6983369	+;+;+;+;+	2229	23	23	7	64	19	55	73	48	87	19	97	25	0.785493907	-0.20865678	1.592062678	0.228585356	0.496408818
FBgn0071954	3	6974272	6975839	+;+;+;+;+	1320	7332	6286	3945	7264	3951	4329	8200	4550	4242	2868	7639	3021	-0.214889536	6.655094906	2.120173801	0.16843268	0.421569661
FBgn0071955	3	6877910	6879576	+;+;+	1546	2576	3562	4292	9	1331	2413	8001	4010	3819	2864	6530	3726	0.693524614	6.154707791	0.709225079	0.418197482	0.676337451
FBgn0071956	3	6154448	6155557	-;-;-	990	11670	8225	5101	13021	3682	5993	10996	6059	6885	2761	9418	3215	-0.379455168	7.034117727	6.862478419	0.020797469	0.128072296
FBgn0071958	3	6172917	6174829	+;+;+;+	1388	77	17	55	31	52	12	110	56	56	43	75	16	0.377206102	-0.03728533	0.624162128	0.44328229	0.696679382
FBgn0071959	3	6170530	6170973	+	444	587	830	393	975	334	314	713	616	826	254	899	407	-0.083135638	3.457143236	0.23604673	0.634936016	0.823647513
FBgn0071960	3	10998300	10999485	-	1186	4934	3507	3557	7113	2808	2723	5751	3022	3466	1894	5227	1371	-0.379317381	6.129199085	6.688501654	0.022173332	0.133248663
FBgn0071961	3	12192003	12192926	-	924	302	132	143	216	117	20	136	106	128	40	137	54	-0.732871892	1.210136365	3.914892031	0.068823581	0.255147941
FBgn0071962	3	14128493	14130178	-;-;-;-	1130	245	139	301	194	29	28	114	135	114	12	167	227	-0.848958824	1.456993636	4.79105822	0.046899263	0.205002821
FBgn0071965	3	14106211	14106918	-;-;-	592	268	224	135	245	141	146	440	209	427	147	443	129	0.4706463	2.17702937	5.240702927	0.038911784	0.18453257
FBgn0071970	3	15956867	15957805	-;-	880	391	453	360	521	204	188	443	411	464	192	592	158	-0.104773359	2.752132684	0.382174058	0.546821994	0.770314314
FBgn0071971	3	15951703	15952701	-	999	106	77	55	50	56	8	161	85	224	78	193	34	0.993284576	0.765512331	5.167541766	0.040094896	0.186972887
FBgn0071972	3	15941140	15941719	+	580	267	203	90	202	87	17	335	161	163	69	253	118	0.306513892	1.527710731	0.697796462	0.418192606	0.676337451
FBgn0071974	3	7955484	7958390	+;+;+;+;+;+	2576	1405	1718	823	1691	761	1029	1854	1259	1712	883	2076	625	0.065532005	4.633146099	0.154626523	0.700346924	0.857380618
FBgn0071975	3	18941861	18943834	-;-;-;-;-;-	1647	2848	1574	779	1734	743	1013	1959	1234	1085	693	1976	522	-0.201122469	4.604487529	1.668312465	0.2183521	0.485311333
FBgn0071977	2	12476890	12478916	+;+;+;+;+;+	1724	1406	754	696	1341	512	519	1116	949	1063	458	1225	459	-0.060993116	4.008329889	0.22916559	0.63987171	0.826543166
FBgn0071978	2	12494792	12497103	+;+;+;+;+	1761	1690	1528	1323	1260	785	932	1969	1514	1469	921	2179	986	0.108775934	4.732089635	0.400045368	0.537725367	0.765595274
FBgn0071979	2	12486120	12488995	-;-;-	1738	28	26	67	17	6	24	4	39	51	9	39	38	-0.528702911	-0.679402407	0.776497902	0.393768843	0.659063589
FBgn0071980	2	12521707	12523295	+;+	1524	1002	930	629	1079	304	405	1181	631	716	434	914	337	-0.10698979	3.699642451	0.573009596	0.462188281	0.711061883
FBgn0071982	2	18281291	18311625	-;-;-;-;-;-;-;-;-;-;-;-;-;-;-;-;-;-	3180	2034	2118	435	897	313	756	3523	1653	2713	1183	3006	831	0.936749098	4.825936597	8.619055026	0.012267914	0.093979759
FBgn0071984	2	64044	65540	-;-	1434	388	293	228	421	156	170	440	259	265	157	594	178	0.060385705	2.436730323	0.118277508	0.736255059	0.877923038
FBgn0071986	3	5386459	5387078	+	620	539	589	240	542	206	172	667	342	554	240	721	187	0.152130546	2.890135643	0.738345685	0.40532387	0.666777741
FBgn0071992	3	12113843	12120207	+;+;+;+;+;+;+;+;+;+;+;+;+;+;+;+;+;+;+;+;+;+	4711	7895	5215	4142	6467	2724	3252	6122	3938	3665	2268	6554	3122	-0.295280488	6.433353505	4.730629664	0.048114599	0.207325285
FBgn0071993	3	12041283	12052412	-;-;-;-;-;-	3638	0	21	4	3	0	0	27	34	11	31	17	4	2.279983398	-1.828303303	4.8337228	0.046063058	0.203037386
FBgn0071995	XR_group6	12716243	12717776	-;-	1464	66	49	12	36	9	27	60	18	21	6	17	6	-0.673090607	-0.964717246	1.710686531	0.212922863	0.478530694
FBgn0071996	XR_group6	12706485	12710620	-;-;-;-	2345	325	294	190	440	88	140	408	407	367	154	399	148	0.268978953	2.34034161	1.856454475	0.195530129	0.455808658
FBgn0071997	XR_group6	12654930	12657727	-;-;-;-;-	1670	101	210	212	370	114	98	261	474	310	78	422	595	0.432702202	2.469007903	1.185540006	0.29556421	0.567815769
FBgn0071998	XR_group6	12594852	12595510	-;-;-	522	405	314	208	464	125	114	278	180	289	79	402	114	-0.467173813	2.128846345	6.040959661	0.028322688	0.154870672
FBgn0072000	XR_group6	12566732	12576554	-;-;-;-;-	4224	180	107	78	108	49	84	90	87	150	26	194	25	-0.429848459	0.83645071	1.332836865	0.268505393	0.542141698
FBgn0072001	3	92677	93769	+	1093	3747	2288	1798	4053	1060	1247	3292	2653	2913	1292	3908	1835	0.107413474	5.508361941	0.811321025	0.383656769	0.650229059
FBgn0072004	XR_group6	1154390	1155546	-;-	1094	835	564	313	1287	478	325	1369	623	1130	503	881	351	0.417457939	3.710273688	4.610840911	0.050635912	0.213529565
FBgn0072005	XL_group1e	11982063	11983242	-	1180	6402	4467	3170	6409	2537	2133	5802	3064	5509	2244	4691	1338	-0.210278436	6.168402888	2.486558358	0.138164978	0.379295145
FBgn0072006	XL_group1e	12124691	12125263	-	573	0	0	1	13	0	0	24	0	0	0	12	0	1.241177637	-3.277102684	0.827970836	0.378960499	0.645533849
FBgn0072007	XR_group8	8299281	8303190	+;+;+;+;+;+;+	1928	34	51	18	35	6	8	10	0	27	4	17	20	-1.272020114	-1.377586183	3.012294824	0.105593914	0.326102593
FBgn0072008	XL_group1a	1546181	1548622	-;-;-;-	2250	5	334	796	1807	717	764	3	3300	1837	18	1381	873	-0.967775067	4.300737018	0.228703767	0.642322747	0.827671011
FBgn0072009	XL_group1e	7697068	7719328	-;-;-;-;-;-;-;-	2565	1454	1179	855	1743	525	540	1442	1491	1133	650	1863	1271	0.244292109	4.477274835	1.757789713	0.207091606	0.470687395
FBgn0072010	XL_group1e	1687865	1690437	+;+;+;+;+	2330	9072	7367	5014	9649	4215	4739	8125	3880	4384	3408	6731	2512	-0.50351122	6.765945032	21.45219512	0.000436268	0.012158383
FBgn0072016	XL_group3b	234478	236024	+	1547	693	402	424	1028	262	254	889	327	751	325	1106	255	0.162987629	3.301113995	0.602964888	0.450958953	0.701466627
FBgn0072019	XL_group3b	371654	380592	+;+;+;+;+	2830	991	548	568	819	288	316	696	540	670	200	637	381	-0.343405097	3.354292254	5.033058317	0.042382327	0.193193431
FBgn0072020	XL_group1a	7873210	7876208	+;+;+	2859	8428	7776	3966	5215	2946	2919	6283	3143	5044	2917	8384	2377	-0.249035513	6.505294904	2.34458138	0.149015818	0.395553104
FBgn0072021	XL_group1a	6739428	6742725	-;-;-	3161	35036	29373	17847	29248	14133	17868	37489	20709	20250	14373	38366	13142	-0.081511148	8.806868217	0.39136059	0.542109431	0.767553799
FBgn0072023	XL_group1e	7723661	7724690	-;-;-	896	269	127	105	108	67	95	112	164	52	89	129	23	-0.372832027	1.107373713	0.975007338	0.340955624	0.610387037
FBgn0072024	XL_group1e	7726741	7732223	+;+;+;+;+	1057	165	119	67	247	49	55	174	164	158	61	299	113	0.361414986	1.321327285	1.779702654	0.204449269	0.467280798
FBgn0072025	XL_group1e	2956501	2957430	+	930	464	286	317	714	190	234	608	291	518	170	517	178	-0.088595322	2.756412248	0.210312707	0.653883022	0.833486851
FBgn0072026	3	2745937	2747593	+;+;+;+	1465	802	523	320	613	419	341	820	624	965	359	955	253	0.311056991	3.431933713	2.765685274	0.119541175	0.350100894
FBgn0072030	XR_group8	732625	752988	-;-;-;-;-	2256	295	176	120	331	80	92	208	223	163	129	299	137	0.163318173	1.800319821	0.490750498	0.495595233	0.73597646
FBgn0072031	XR_group8	4837173	4839720	+;+	2481	4500	3014	2563	4497	1674	1983	4118	2061	3073	1391	3413	810	-0.40854382	5.650211624	9.209738564	0.009311539	0.07955705
FBgn0072033	2	19900106	19900821	+	716	697	549	205	720	197	232	891	586	785	294	823	177	0.434633741	3.159504308	4.362536865	0.056379653	0.228312264
FBgn0072035	XR_group8	4941576	4943933	-;-;-	2224	16758	14229	8734	17311	6642	6400	16923	8949	10334	5774	15254	4882	-0.251473787	7.645081651	8.240797101	0.012809854	0.096283685
FBgn0072036	XR_group8	2239258	2248687	-;-;-	895	21	19	4	3	0	1	19	2	0	2	1	8	-0.41344428	-2.69621869	0.160124054	0.695357995	0.854835764
FBgn0072037	XR_group8	2063979	2078597	-;-;-;-;-;-;-;-;-;-;-;-;-;-;-	4986	3422	2409	1856	3316	1221	1478	3538	2311	2425	1243	3314	1115	-0.068542676	5.398473804	0.517571698	0.484256745	0.727226873
FBgn0072039	XR_group8	2032982	2033705	+	724	353	459	387	505	228	134	541	346	480	169	537	168	-0.113420266	2.719569963	0.345584474	0.566413805	0.782727783
FBgn0072041	XL_group1e	9481637	9482509	+;+	844	0	20	42	0	0	0	2	43	256	0	70	28	1.636001709	-0.499165893	3.993762825	0.066409783	0.2496923
FBgn0072042	XR_group8	2009983	2011074	-;-	1029	314	184	173	236	127	158	187	142	153	80	277	76	-0.536490477	1.741893375	5.965384413	0.029163413	0.157348861
FBgn0072044	XR_group8	1993746	1998701	-;-;-;-	1581	84	56	37	102	30	29	387	360	469	66	544	203	2.252165523	1.781511988	63.80393328	1.88E-06	0.000349943
FBgn0072057	XR_group8	2016338	2017423	+;+	1028	54	26	32	49	15	29	72	38	30	25	64	19	0.189744499	-0.458025591	0.284448082	0.602547959	0.806858303
FBgn0072059	XR_group8	2007139	2008574	+;+;+	1271	304	158	55	133	87	94	112	77	74	42	85	33	-0.85419528	0.971024423	8.841088736	0.010492591	0.085174496
FBgn0072061	XR_group8	2002433	2003110	+;+	610	12	3	10	41	11	16	7	48	88	0	37	42	-0.159275687	-0.897349281	0.019090425	0.8921654	0.952104804
FBgn0072067	2	19902244	19903233	+;+	918	1986	1190	985	2208	675	683	1790	746	1361	618	1700	501	-0.258097798	4.428234512	3.86147582	0.070518066	0.259183891
FBgn0072070	XR_group8	1909679	1910650	-;-;-	644	1799	1578	990	2090	538	692	2387	1127	1681	718	2014	522	0.03652584	4.566870608	0.063335778	0.805123497	0.911335237
FBgn0072072	XR_group6	1740762	1742540	+;+;+;+	1602	282	265	170	234	64	76	260	142	181	99	215	47	-0.279816252	1.603617706	1.218902985	0.289036454	0.561903697
FBgn0072075	4_group5	1156246	1157598	-;-;-;-	1043	232	25	32	53	44	12	164	194	160	27	139	143	1.100191674	0.915124338	2.789839255	0.118079308	0.347643675
FBgn0072078	XR_group8	8347995	8380748	+;+;+;+;+;+;+;+;+;+;+;+;+;+;+;+;+;+;+;+;+;+;+;+;+;+;+	10404	2504	1654	1081	1905	762	634	1991	1797	1905	838	2018	984	0.118815152	4.782875538	0.908146821	0.357506633	0.625115502
FBgn0072079	4_group1	1659746	1660897	-;-;-	1033	402	50	187	258	145	71	260	153	219	117	260	189	0.133851607	1.877441557	0.113811546	0.741079666	0.880750285
FBgn0072081	4_group4	5999281	6001130	-;-	1794	36	306	30	28	25	10	63	11	33	18	31	5	-1.525399333	-0.116479144	4.294419598	0.058088554	0.231739614
FBgn0072082	4_group4	6002174	6003941	-;-	1698	1528	1459	426	755	433	464	635	461	513	301	683	190	-0.872483299	3.579470219	15.07334732	0.001794483	0.029742084
FBgn0072083	4_group4	6071241	6074082	-;-;-	1175	145	150	76	183	118	135	330	177	220	93	277	176	0.514164745	1.757838347	2.625838801	0.128456466	0.364005424
FBgn0072084	4_group4	6141437	6143874	-;-;-	2297	163	36	71	50	22	20	54	46	25	1	88	28	-1.034367576	-0.139765487	2.717544601	0.122521643	0.354728187
FBgn0072087	Unknown_group_503	7271	8848	-;-;-;-	1409	473	488	289	647	355	212	680	464	618	311	673	177	0.163064546	3.06305983	0.747899083	0.402381809	0.665524339
FBgn0072088	XR_group8	8417312	8419541	+;+;+;+;+;+	1929	8971	7572	5229	8981	3429	2823	10962	6015	7173	3473	8661	2806	-0.016976542	6.832454225	0.024326361	0.87838609	0.94629623
FBgn0072089	4_group1	1016161	1017624	-	1464	421	218	211	367	114	164	624	388	547	236	635	265	0.775008493	2.671679934	24.63923372	0.000237843	0.008540836
FBgn0072090	4_group1	1029401	1046351	+;+;+;+;+	864	8	17	8	30	12	2	10	14	8	2	16	15	-0.606083632	-1.952827027	0.796960533	0.387778402	0.653430631
FBgn0072092	4_group1	1020139	1022806	+;+;+	2538	554	326	508	1008	214	246	593	377	703	357	507	210	-0.061797174	3.111615628	0.06361276	0.804707417	0.911335237
FBgn0072093	4_group1	1017685	1018322	+	638	114	212	28	54	37	42	80	96	90	28	90	31	-0.4113144	0.48424622	0.899219637	0.359805056	0.627325287
FBgn0072094	4_group5	1263741	1270534	-;-;-;-;-;-;-;-	1687	1083	860	793	1936	665	394	1342	1860	1426	551	1848	1267	0.370173496	4.464866087	2.267486611	0.155432899	0.404687643
FBgn0072095	4_group5	1293811	1294545	+;+;+	602	5197	3356	1820	4005	1001	1699	4285	5063	6332	1809	5574	4534	0.567150712	6.116010531	6.562069243	0.023526794	0.137938633
FBgn0072096	4_group5	1413734	1434686	+;+;+;+;+;+;+;+	3268	118	0	51	27	37	44	13	59	7	1	44	14	-1.496738787	-0.495408699	1.717426583	0.21268571	0.478290465
FBgn0072097	4_group5	1474639	1475940	+;+	1237	179	51	77	101	35	18	64	19	75	32	47	14	-0.821596977	0.105769192	3.859419243	0.070584297	0.259362415
FBgn0072098	4_group5	1477872	1567867	+;+;+;+;+;+;+;+;+;+;+;+;+;+;+;+;+	7906	2926	1475	1580	2024	995	799	2938	1882	2373	1124	2828	1276	0.259829777	5.091684237	4.026486433	0.065438075	0.247653414
FBgn0072099	XR_group8	8450326	8454061	+;+;+;+;+;+;+;+;+	2456	1082	761	631	913	328	295	1267	995	1294	517	1364	546	0.476720197	3.916029422	16.83749917	0.001175826	0.022783693
FBgn0072100	4_group1	956369	956770	-	402	1639	1475	662	2335	759	574	833	601	420	246	949	250	-1.226654383	4.008036542	36.36145147	3.75E-05	0.002490426
FBgn0072103	4_group3	635407	636318	-	912	6	4	12	2	7	0	12	4	8	57	6	16	1.829331621	-1.761480069	3.34474536	0.089791478	0.297488707
FBgn0072104	4_group3	633082	634587	-;-	1391	0	8	14	4	0	2	4	24	14	6	39	11	1.50396512	-2.108156587	3.650324739	0.077725212	0.2741475
FBgn0072105	4_group3	438883	441275	-	2393	54	24	22	53	5	4	27	60	65	20	28	46	0.646979838	-0.583992129	1.518357801	0.239083949	0.508165841
FBgn0072106	4_group3	433000	433681	-	682	435	290	284	832	143	133	512	599	493	266	635	601	0.561457538	3.047488917	3.896621872	0.069397612	0.256736205
FBgn0072107	4_group3	401411	406647	+;+;+;+;+;+;+;+	1788	291	258	166	353	142	176	592	410	585	183	554	231	0.71114811	2.592922146	15.57464711	0.001586869	0.02723518
FBgn0072109	4_group3	381619	382833	+;+	1166	1542	846	1165	1576	541	603	1032	803	919	584	1094	387	-0.436480209	4.117859774	6.974219306	0.019966392	0.124520762
FBgn0072110	4_group3	262767	268322	+;+;+;+;+;+;+;+;+	3305	1719	1646	985	3190	790	800	2101	2282	1756	830	2966	1811	0.258566906	5.015875122	1.394002976	0.258294431	0.531312368
FBgn0072111	4_group3	247633	249933	+;+;+;+;+;+	2025	287	26	565	694	28	193	88	95	86	18	115	37	-2.380240162	1.794169444	13.86491574	0.002784214	0.039093453
FBgn0072112	4_group3	217493	219298	+;+;+	1676	760	308	321	622	129	159	615	459	654	190	757	266	0.261231035	2.928259074	1.685155571	0.216172724	0.482732066
FBgn0072113	4_group3	152336	155775	-	3440	9545	8069	4715	7241	2803	4178	6896	4230	4088	3550	7800	2695	-0.346528123	6.677645716	5.498857203	0.035053428	0.174518541
FBgn0072114	4_group3	69263	96661	-;-;-;-;-;-;-;-;-;-;-;-;-	2518	613	132	892	407	139	185	211	348	214	58	243	107	-1.364678333	2.514090019	11.48030344	0.004861558	0.054840019
FBgn0072116	4_group3	163946	167900	+;+	3893	13490	14507	11398	17408	7724	7358	19641	11666	13988	7036	20028	5921	-0.056355072	7.854619764	0.212406976	0.652289404	0.832842523
FBgn0072121	XL_group1e	9391941	9393864	-	1924	9149	5117	3112	7969	3168	3534	8023	4421	4807	3295	7639	2788	-0.003719829	6.592196395	0.001486977	0.969809576	0.986458881
FBgn0072122	4_group2	1111976	1119527	+;+;+;+;+;+;+;+	2802	1023	1038	530	1623	1377	453	915	748	1086	389	1109	333	-0.486571134	4.104991199	2.304108516	0.153355498	0.401413688
FBgn0072123	XL_group1a	2147150	2147777	+;+	563	853	471	396	1041	236	360	1174	891	899	449	1390	929	0.727950585	3.823694457	10.86064846	0.005600694	0.059247084
FBgn0072124	4_group1	3702370	3703964	-;-;-;-;-	978	3882	2677	1722	4090	1540	1509	3266	1969	3225	1262	3465	968	-0.193465491	5.478299435	2.933235234	0.109837445	0.33454636
FBgn0072126	3	11135313	11137209	-;-;-;-	1326	1397	796	546	920	677	424	845	471	737	305	673	180	-0.62354225	3.630547388	11.87432546	0.004178431	0.050573947
FBgn0072127	2	19917854	19919357	+;+;+	1372	416	333	280	335	59	55	388	242	375	99	387	209	0.070037831	2.227843389	0.08130086	0.779908236	0.899691048
FBgn0072128	3	17335325	17337182	+	1858	1208	1470	1092	1507	688	646	1387	1005	1394	555	1515	520	-0.251586496	4.3390078	3.339220288	0.090029666	0.297941799
FBgn0072129	3	1816314	1817453	-;-	1085	130	141	83	117	29	47	206	100	134	70	148	65	0.33262945	0.959078118	1.676331585	0.217310932	0.483816057
FBgn0072134	XR_group8	2295966	2298984	+;+;+;+;+;+;+;+;+;+	2216	3002	1973	1565	2931	1015	1178	2794	1966	2843	1361	3233	1168	0.143290842	5.25902958	2.23361626	0.158244507	0.408710226
FBgn0072135	3	7478540	7482231	+;+;+;+;+;+;+;+;+;+;+;+	2740	0	26	31	16	6	8	60	25	6	6	8	58	0.669510515	-1.098479639	0.601089039	0.451648816	0.702017796
FBgn0072136	3	7455693	7461951	+;+;+	6137	11856	15927	7842	13632	4427	5306	13831	7763	9102	4642	12117	3978	-0.316943144	7.38231092	5.101624908	0.04119736	0.189616304
FBgn0072137	3	2816173	2817338	-;-	1110	728	372	187	507	132	141	451	491	503	177	598	386	0.315787191	2.817511296	1.619393671	0.224846582	0.492168319
FBgn0072138	3	2829572	2833946	+;+;+;+;+;+;+;+;+;+;+;+	2246	8701	19127	9766	19468	7755	11571	19724	10898	11882	7395	19551	6473	-0.199028487	7.920004198	0.677325982	0.426123048	0.681750458
FBgn0072139	3	2837032	2854088	-;-;-;-;-;-;-;-;-;-;-	3904	101	20	15	18	32	62	69	89	129	44	56	51	1.03233125	0.223371426	2.681126321	0.124837212	0.358172326
FBgn0072140	3	2874856	2876006	-	1151	7958	5395	4270	6553	2796	3468	8256	3834	4490	3313	8466	2724	-0.043350231	6.566560195	0.123766219	0.73046404	0.875455334
FBgn0072142	3	2889577	2890348	-;-	714	0	0	0	0	0	1	22	10	19	8	16	4	5.496937669	-2.687803654	34.7894419	4.67E-05	0.002943135
FBgn0072143	XR_group6	12333867	12337931	-;-	4006	20262	12321	9757	11739	6662	8256	18978	10022	11271	9097	20553	7630	0.125284561	7.843333132	0.686246291	0.421975933	0.679035885
FBgn0072145	3	2951778	2953509	-	1732	18241	14630	9657	16275	5929	8107	18724	12093	10695	7786	21827	7832	0.044415377	7.867200008	0.122373434	0.731919575	0.876167805
FBgn0072146	3	14364223	14365860	-;-;-	1543	295	273	171	411	146	132	255	172	164	106	217	73	-0.564215622	1.908104148	9.369612063	0.008847851	0.077166502
FBgn0072147	XR_group8	2302013	2304329	+;+;+	2103	707	276	325	552	129	175	513	500	678	208	740	437	0.391178555	2.994838224	3.313327927	0.091156127	0.299979841
FBgn0072148	3	17041226	17124260	-;-;-;-;-;-;-;-	2552	305	127	129	391	132	107	382	372	192	121	394	193	0.468683542	2.133039907	2.673519421	0.125327657	0.358808442
FBgn0072150	3	7898499	7899533	-	1035	9731	5058	6408	6460	4148	6238	4317	3704	2621	2356	5900	2206	-0.972426863	6.622802456	15.58599638	0.00179623	0.029742084
FBgn0072152	3	17036165	17038211	+	2047	1264	749	678	951	312	323	1194	893	1031	320	1284	486	0.113470925	3.814612377	0.705936437	0.415558374	0.67454534
FBgn0072153	XR_group6	9966466	9967360	+;+	818	1051	511	754	866	326	531	803	433	672	307	696	336	-0.452895145	3.528580285	5.450098355	0.035746355	0.176532183
FBgn0072155	3	16975251	16976573	+;+;+	1201	744	437	394	568	247	262	391	401	472	168	571	129	-0.477221507	2.867811843	6.730184115	0.021834237	0.13175035
FBgn0072156	3	16930498	16931976	+;+;+	1353	405	26	20	50	20	16	78	67	13	19	89	29	-0.183394234	0.181000414	0.053634894	0.820359173	0.919665872
FBgn0072157	3	16883559	16894833	+;+;+;+;+	2704	615	333	337	408	143	130	461	337	329	106	558	305	-0.118611356	2.62135932	0.317028196	0.582712053	0.793961176
FBgn0072158	3	16873714	16960568	-;-;-;-;-;-;-	4408	12	7	41	25	21	13	57	32	42	17	38	27	0.462097838	-0.793195813	0.737760625	0.405505128	0.666926519
FBgn0072159	3	16856012	16862116	-;-;-;-	5924	134	69	106	102	46	44	211	170	175	73	268	130	0.821338132	1.257613604	11.31372989	0.004905089	0.054993167
FBgn0072160	3	16865244	16869366	+;+;+;+;+;+;+	1713	1972	1345	975	2060	500	711	2111	1130	1698	700	1781	680	0.041157023	4.542982962	0.112383901	0.742644309	0.880964136
FBgn0072161	3	4728114	4730672	+;+	2503	67	4	0	26	5	3	38	17	23	5	18	12	0.845496542	-1.571702992	0.784738155	0.391339634	0.65664403
FBgn0072162	XR_group6	12338869	12339537	-;-	601	271	356	175	379	180	85	297	187	332	85	323	102	-0.341855227	2.07050314	1.995280498	0.180626415	0.43622677
FBgn0072164	3	13543517	13544357	+	841	438	720	389	543	173	228	564	327	531	185	553	162	-0.303379247	2.866908151	2.459850166	0.140129252	0.381903568
FBgn0072165	3	14100729	14101158	-;-	375	917	1711	837	1470	622	670	1950	753	925	466	1464	401	-0.283479076	4.216148768	1.699136263	0.214385184	0.480273825
FBgn0072166	3	13517064	13520600	-;-;-	2565	4	5	6	11	0	9	4	8	25	8	13	4	0.634385665	-2.408685596	0.655669726	0.432258547	0.688139846
FBgn0072170	3	14051960	14053024	-;-;-	942	91	46	24	0	7	5	64	75	121	38	56	36	1.221770296	-0.180390805	2.589143255	0.130930219	0.367892123
FBgn0072171	3	14078893	14086485	+;+;+;+;+;+;+;+;+	5621	0	16	2	0	0	12	22	16	4	10	8	2	0.773687472	-2.435678157	0.515211146	0.485236418	0.727966499
FBgn0072174	3	11067316	11071436	-;-;-;-;-;-;-;-;-;-	3035	11663	9403	4536	10681	4664	4951	8565	5283	3848	2762	7812	2667	-0.608753423	6.884813234	18.43422786	0.000820093	0.018139627
FBgn0072176	3	11020900	11021464	-	565	0	0	0	0	0	0	12	4	6	0	12	18	5.619372764	-3.076137781	14.86166983	0.004434613	0.052230283
FBgn0072179	2	582474	608438	-;-;-;-;-	5058	1181	919	650	1247	675	444	1328	518	805	512	1152	384	-0.183922197	3.92867735	1.589533024	0.228935515	0.496717083
FBgn0072180	3	11066376	11066982	+	607	3429	2480	1416	1749	834	915	2106	1224	1451	620	1904	582	-0.563411307	4.804158116	12.11499305	0.003905255	0.04858601
FBgn0072181	3	11057306	11058580	+	1275	519	234	255	643	162	172	385	417	534	157	483	242	0.063279631	2.673320405	0.086708363	0.772923269	0.896166899
FBgn0072182	3	11043890	11045452	+;+	1478	2	14	0	2	8	0	28	8	5	6	10	54	1.823238969	-1.831483736	2.468355619	0.139499974	0.381125009
FBgn0072183	3	11035795	11037938	+;+;+;+;+;+;+	1796	963	901	692	1075	659	427	824	545	588	412	867	223	-0.550445462	3.701755679	10.49777045	0.006241067	0.062714604
FBgn0072184	3	11034424	11035419	+	996	34	6	10	50	10	8	16	8	2	12	16	3	-0.726819435	-1.760578423	1.625111123	0.224074611	0.491558448
FBgn0072188	3	18689729	18745836	+;+;+;+;+;+;+;+;+	3091	588	222	259	105	177	148	310	142	210	90	290	124	-0.513359287	2.070009271	2.253426493	0.156545558	0.406359951
FBgn0072191	3	18745911	18749126	-;-;-;-;-;-;-;-;-;-	1816	31	129	47	53	8	12	111	92	55	47	128	20	0.657040372	0.155838117	1.790629923	0.203147887	0.465987833
FBgn0072194	4_group4	4530868	4531962	-;-;-	693	2624	919	1214	2370	726	810	1830	834	1642	723	1890	732	-0.200083966	4.619799809	1.267537342	0.280019053	0.552997154
FBgn0072195	4_group4	4670773	4672182	+;+	1357	29498	27933	14084	28024	10273	11977	30876	17675	16208	11007	29888	11879	-0.108329791	8.512809708	0.719664547	0.411174414	0.671513772
FBgn0072196	4_group4	4742215	4742976	+;+;+;+	662	8152	6542	3027	8883	2462	5190	12814	6600	8208	5177	12064	5863	0.573463604	7.043242555	8.600923337	0.011485352	0.090351026
FBgn0072197	4_group4	4857632	4858030	+;+	337	13540	6956	6136	9143	4241	4978	8777	5286	5854	4024	9795	3246	-0.314077793	6.987697606	7.571171417	0.016131744	0.109891898
FBgn0072198	XR_group6	13137653	13139186	-;-;-	1413	63	57	17	50	2	6	23	32	29	12	44	15	-0.310538451	-0.90327214	0.333190091	0.573371829	0.78679922
FBgn0072199	XR_group6	13099124	13101745	+;+;+	2461	0	0	0	2	0	0	40	46	22	6	62	29	5.886652616	-1.533833326	47.55882454	9.37E-06	0.001078007
FBgn0072200	XR_group8	7918931	7935244	+;+;+;+;+	4783	157	56	80	113	32	29	72	61	54	26	60	57	-0.519315686	0.330560468	2.273315492	0.154862781	0.403847598
FBgn0072202	XR_group8	8140331	8154405	+;+;+	2221	998	391	493	736	286	268	480	529	574	239	701	443	-0.18359484	3.264331055	0.733265254	0.406902057	0.667281209
FBgn0072204	XR_group6	1315839	1316949	-	1111	1883	1776	1028	2131	667	695	3413	1915	2502	1055	3152	1407	0.615424569	5.020604485	33.79927379	5.38E-05	0.003188099
FBgn0072206	4_group3	8266279	8330029	+;+;+	2412	181	178	126	345	79	78	138	147	75	134	206	134	-0.074700999	1.559777565	0.048371682	0.829241449	0.924337368
FBgn0072207	4_group3	3058153	3061969	-;-	1378	101666	69564	48336	88672	33637	39948	108979	53798	62727	39093	94057	36782	0.007867463	10.21239097	0.006699043	0.935979605	0.972645422
FBgn0072209	4_group3	2978656	2980178	-	1523	26	0	12	8	2	4	8	11	36	0	18	22	-0.069697116	-1.933438448	0.005430231	0.942347296	0.974795499
FBgn0072210	4_group3	2976315	2978087	-;-	1704	0	4	2	171	8	0	21	32	110	8	25	14	0.01040436	-0.807665846	3.93E-05	0.995094482	0.997914522
FBgn0072211	4_group3	2954368	2958624	-;-;-	2755	46	45	41	46	24	30	39	51	15	20	42	15	-0.472820415	-0.508286038	1.306296642	0.273105893	0.54595158
FBgn0072212	4_group3	3035905	3036465	+;+	499	2938	2528	1718	3282	1183	1247	3747	1982	2849	1354	3495	1099	0.071936183	5.373556484	0.571477119	0.462775277	0.711454066
FBgn0072213	4_group3	3014728	3019649	+;+;+;+;+;+;+;+;+;+;+	1978	0	18	29	20	6	0	79	32	20	2	11	20	0.952208581	-1.3461285	1.132475811	0.306077181	0.579197101
FBgn0072214	4_group3	2984623	2986256	+;+;+	1511	2457	613	646	1850	691	403	1017	947	605	111	1194	750	-0.716272621	4.063958606	2.392454569	0.14809668	0.393877846
FBgn0072215	4_group3	2948930	2971882	+;+;+;+;+	1805	20620	15997	11961	18073	10330	8278	23304	12995	13524	9411	21812	9802	0.01941923	8.114565607	0.022910975	0.881947259	0.948011558
FBgn0072216	4_group3	2944689	2948404	+;+;+;+;+;+;+	3292	3279	2239	1462	3733	1494	1173	3282	2184	3194	1483	3255	1105	0.104153196	5.408164092	0.86580613	0.368604411	0.635783086
FBgn0072217	4_group3	2935388	2938691	+;+;+;+	3079	275	119	53	184	93	54	166	134	128	44	161	60	-0.113290851	1.145191402	0.133813899	0.720228629	0.869400663
FBgn0072218	4_group3	2932604	2935241	+	2638	7	40	0	18	10	0	12	4	22	0	8	2	-1.117208383	-2.208824032	1.108706513	0.311008523	0.583257052
FBgn0072219	4_group3	2920438	2925865	+;+;+;+;+;+	1438	368	356	837	1001	941	484	182	2392	1029	20	1020	650	-0.838884113	3.99192457	0.544615224	0.476231552	0.721088252
FBgn0072226	XR_group6	9626603	9628440	+;+;+;+	1691	1403	1238	840	1421	687	581	1458	703	1254	732	1638	579	-0.023530479	4.287192491	0.029325421	0.866592614	0.940698132
FBgn0072229	XR_group3a	203243	204273	-;-;-	888	3221	2318	1556	3146	1097	1338	2547	1680	2173	1021	2748	874	-0.272409782	5.173677128	9.101222775	0.009642366	0.080970517
FBgn0072231	2	19870404	19872402	+;+;+;+	1262	52	105	66	9	40	38	90	102	27	94	173	55	0.655814721	0.548718793	1.29412507	0.275251547	0.548803547
FBgn0072232	XR_group3a	365318	391696	-;-;-;-;-	2910	93	92	42	93	6	46	63	45	64	39	38	14	-0.429974784	-0.005438898	0.891164983	0.361897571	0.629088509
FBgn0072236	XR_group8	8763969	8764966	-;-	935	540	233	427	353	52	154	310	183	372	11	341	179	-0.941378247	2.228410816	4.607953064	0.050962273	0.214387082
FBgn0072238	XR_group8	8774991	8777115	+;+;+;+;+	1843	88	4	25	38	4	6	11	15	34	9	28	9	-0.554053508	-1.255561893	0.653462986	0.43301614	0.688591645
FBgn0072239	XR_group8	8771560	8772239	+;+	610	223	163	112	284	20	23	366	242	352	8	221	250	0.36526392	1.723467483	0.466350681	0.506648073	0.744136574
FBgn0072241	XR_group8	4200690	4202438	-;-;-	1310	198	121	70	116	64	69	117	78	115	55	115	28	-0.350373442	0.838507489	1.88672895	0.192149721	0.451031318
FBgn0072242	XR_group5	568461	569732	-;-;-	906	55	27	6	18	7	22	54	15	32	13	44	13	0.423586739	-1.042593173	0.683194031	0.422984779	0.679523109
FBgn0072243	XR_group5	520010	520756	+	747	3799	2651	2443	3458	1139	780	1527	1680	1553	137	2861	2961	-1.134322905	5.295869273	7.112198589	0.021122968	0.129302289
FBgn0072244	XL_group1e	8617693	8626463	-;-;-;-;-;-;-	3495	18351	9073	6997	12933	4649	4735	14816	7876	9914	7913	11411	4581	0.09560006	7.432273918	0.622997074	0.443698645	0.69703733
FBgn0072245	XL_group1e	8658722	8660502	-;-	855	725	494	352	743	372	289	792	829	771	216	575	111	0.004383297	3.244852909	0.000213519	0.988558033	0.994798563
FBgn0072246	2	27270856	27272339	-;-;-;-	1315	65	315	86	92	37	28	78	70	68	17	61	11	-1.257880112	0.512409391	7.277498852	0.017899169	0.116632915
FBgn0072247	3	14342456	14343455	+;+;+	809	8076	5963	3834	7392	3751	2316	6547	3662	4908	2198	6273	1923	-0.385011962	6.429193466	10.81813038	0.005671648	0.059646377
FBgn0072249	3	14356807	14360305	+;+;+;+;+;+	2660	965	1350	527	1846	354	302	2113	1170	1453	700	2023	864	0.617180915	4.329686203	8.507239614	0.01171469	0.091182648
FBgn0072251	3	14352989	14355156	-;-;-;-	1959	19196	19243	10741	20647	8166	8794	23556	13124	13039	7395	20852	7819	-0.123256338	8.042759372	1.22424623	0.288026425	0.56118082
FBgn0072252	3	5707254	5707780	-;-	445	284	66	90	106	6	40	36	65	121	7	655	277	-0.202572203	1.371276361	0.0436574	0.837976403	0.928088629
FBgn0072254	3	5794158	5797136	-;-;-;-	2774	21383	16987	13774	22631	11997	11288	24636	15888	16862	8411	22934	7178	-0.18048053	8.241198116	2.201636514	0.161036238	0.412258754
FBgn0072257	3	8249676	8253065	+;+	3331	40	19	46	82	15	0	138	79	75	54	85	36	1.254139269	0.044510117	4.166080008	0.061478906	0.239443303
FBgn0072259	3	8284607	8285968	+	1362	8	12	17	6	0	0	66	45	77	45	82	22	3.009802299	-0.710569616	18.10689087	0.000881549	0.019152816
FBgn0072261	3	14625139	14625829	+	691	97	69	53	81	52	12	18	54	139	6	33	45	-1.053530555	0.08508867	2.774007843	0.119034976	0.349373838
FBgn0072263	3	14445444	14447836	-;-;-	2253	18	23	13	32	2	12	49	31	4	33	45	8	0.802358519	-1.152350116	1.765494931	0.206157481	0.469798967
FBgn0072264	3	14397831	14398504	-;-	623	328	323	124	239	105	99	367	287	500	108	449	108	0.367565754	2.153834899	2.227141148	0.15880483	0.409474462
FBgn0072265	3	14442552	14444378	+	1827	79741	67499	39326	68273	30576	35530	77615	36589	37847	29229	70958	24961	-0.270879509	9.853119504	4.645909871	0.049881902	0.211738581
FBgn0072266	3	14367369	14368893	-	1525	1856	1917	1118	2395	742	947	2320	1398	1917	729	2365	747	-0.072777737	4.796205045	0.366367313	0.555119307	0.775324196
FBgn0072268	3	14368987	14371451	+;+;+;+	2283	14769	12935	6843	14213	5105	6209	11439	6805	8438	4426	11583	3858	-0.433221386	7.343685399	22.58262614	0.000349545	0.010673111
FBgn0072269	3	12145542	12147142	-;-	1550	1931	1114	858	1053	662	490	2511	1538	1904	950	2607	970	0.701330264	4.6524495	24.74231501	0.000233432	0.008402993
FBgn0072270	3	8162977	8164689	-;-;-;-	1552	15733	10478	7793	16535	6773	6947	16542	9619	13683	5968	14888	4269	-0.064266485	7.618658085	0.399325765	0.538086049	0.765595274
FBgn0072271	3	12132972	12135774	+	2803	1793	1156	905	1339	636	919	1536	1005	1340	687	1439	365	-0.171732604	4.352219981	1.178800474	0.296775287	0.569397601
FBgn0072273	XL_group3a	2487537	2489160	-;-	1567	15884	10233	8113	10617	6229	6619	10558	6000	5129	8965	10352	3542	-0.30759743	7.382187778	2.48035158	0.139331934	0.381074138
FBgn0072275	XL_group1a	6587255	6589128	-;-;-	1718	14	16	49	47	8	8	0	16	164	5	40	78	-0.141238623	-0.397017635	0.02695935	0.872033722	0.942987669
FBgn0072279	XL_group1e	273991	274490	-	500	136	71	58	95	38	32	110	81	118	21	89	43	-0.099151642	0.441432724	0.105129618	0.750771786	0.88595414
FBgn0072280	XL_group1e	259665	271974	-;-;-;-;-;-;-;-;-;-;-;-;-	5321	2157	1345	1185	2173	834	675	2123	1595	1871	967	2272	956	0.182667249	4.80029047	2.916743291	0.110748721	0.335772973
FBgn0072281	XL_group1a	571259	573012	-;-	1699	1176	787	609	1122	373	491	988	777	931	514	1214	452	0.056362484	3.864214828	0.220425324	0.646275419	0.830224007
FBgn0072282	XL_group1e	276669	278064	+;+;+	1265	756	544	363	871	209	283	714	479	763	207	821	218	-0.070197679	3.189248094	0.172978168	0.684072171	0.848346531
FBgn0072283	XL_group1e	4392348	4393453	+;+;+	922	7354	9596	3452	8690	2977	3521	10943	5349	6464	3510	9068	3688	0.060624607	6.819419673	0.148447323	0.706079298	0.86166902
FBgn0072285	XL_group1e	4107627	4127258	-;-;-;-;-	4437	355	301	168	801	152	141	311	90	269	154	421	171	-0.365986798	2.315971333	1.329844732	0.269018773	0.542581533
FBgn0072286	XL_group1a	444278	459839	+;+;+;+;+	1642	725	408	263	1012	204	242	606	532	867	107	897	309	-0.066261395	3.150502571	0.051603101	0.823731082	0.92130968
FBgn0072287	XR_group6	11584389	11585338	-	950	830	573	531	738	385	288	800	465	695	425	858	288	0.012419519	3.425937225	0.007104982	0.934073214	0.971997492
FBgn0072291	4_group1	4120648	4122324	-;-	1620	720	1369	766	873	359	596	201	163	163	116	443	88	-2.237860064	3.252680193	64.17379792	1.82E-06	0.000343128
FBgn0072292	4_group1	4112182	4117325	-;-;-;-;-;-;-	4458	36854	34945	16983	37301	14104	18557	45507	27287	31360	17586	48905	17318	0.168395187	9.050998146	2.072078015	0.173001201	0.426463351
FBgn0072294	4_group3	691115	692069	-;-;-	661	20569	11245	10479	19181	6114	7132	15448	10574	17019	6192	17703	6658	-0.11556307	7.806929051	1.243565561	0.284414729	0.557152357
FBgn0072295	4_group1	4143130	4144374	+;+	1191	206	126	133	248	70	139	264	217	301	145	307	73	0.412809847	1.792836518	2.676467201	0.125137322	0.358450218
FBgn0072296	4_group1	4138531	4142031	+;+;+	3177	6097	4955	2496	6331	2019	2181	5702	3941	5591	2421	5604	1715	0.025040822	6.197533809	0.045680884	0.833979545	0.926625483
FBgn0072297	4_group1	4137479	4138379	+;+	840	200	478	174	512	99	181	612	384	474	175	436	121	0.271605792	2.517074411	0.874430522	0.366302921	0.633050723
FBgn0072298	4_group1	4136308	4136831	+	524	3332	1714	1249	2995	968	764	2986	2208	2725	903	3370	1109	0.200449144	5.152794568	1.95290671	0.185016832	0.44170062
FBgn0072300	4_group1	4117890	4119472	+;+;+	1458	829	1558	420	988	326	429	969	506	704	374	1081	243	-0.348777295	3.658681929	2.059191911	0.174251764	0.428539126
FBgn0072301	4_group1	4108824	4112143	+;+	3257	4631	2463	2419	5026	1324	5173	3536	2665	2485	1781	4587	1382	-0.426253161	5.938376328	1.679120062	0.219669386	0.486619046
FBgn0072302	4_group1	4105808	4108302	+;+	2435	1092	641	582	1242	332	353	817	535	793	287	1000	333	-0.27790543	3.576556796	4.21832904	0.060070928	0.236531292
FBgn0072303	2	652459	654215	-;-	1695	16857	12639	10135	17528	6845	10298	20235	10340	11237	7762	20086	7502	-0.041091769	7.889399624	0.083779622	0.776675919	0.898121347
FBgn0072304	4_group1	4084238	4087513	+;+	3218	1060	594	702	1447	558	590	759	501	772	397	970	236	-0.529175564	3.750976386	8.221104997	0.012895417	0.096612958
FBgn0072306	XL_group1e	6162123	6162967	+;+	768	3	4	1	9	6	10	14	0	9	4	72	35	1.470414126	-1.743815135	1.423715176	0.253522341	0.526225355
FBgn0072307	XL_group1e	5113870	5114596	+;+;+	592	8	4	6	26	6	2	23	10	2	11	13	1	0.288477129	-2.298623495	0.188008516	0.6714885	0.841624134
FBgn0072309	2	12101968	12104161	+;+;+	1771	63	160	26	74	22	151	141	110	61	61	155	42	0.056446209	0.82939369	0.010801209	0.918767552	0.964197144
FBgn0072310	2	7835884	7838911	-;-;-;-	1168	2	0	14	2	8	0	12	0	25	4	3	1	0.238321399	-2.749220207	0.043571387	0.837797414	0.928066875
FBgn0072311	2	16471139	16473442	-;-;-;-;-;-;-	1923	212	139	121	171	13	33	174	100	116	45	110	42	-0.245103529	0.891743273	0.425434511	0.525285544	0.756237525
FBgn0072312	3	12218128	12219667	+	1540	20685	18273	13034	22405	6474	9225	18446	11609	15354	7330	18067	6292	-0.321677861	7.991591624	10.65507268	0.005953583	0.061193585
FBgn0072313	2	6730000	6730752	+;+	690	1616	1381	1488	1724	811	1000	2190	1197	1681	776	1896	699	-0.128349936	4.695030774	0.687361391	0.421608317	0.678723259
FBgn0072314	2	6554522	6555104	+;+	462	1044	798	210	379	200	298	479	283	463	178	519	159	-0.516714869	2.900310374	3.500929043	0.083362531	0.285195783
FBgn0072315	2	6517615	6519774	+;+	2100	0	4	0	3	0	434	5	0	4	18	27	1	-1.376400662	0.361757446	0.264599453	0.616787037	0.814855736
FBgn0072316	2	6460652	6461304	-;-;-	523	195	166	112	230	78	47	272	116	305	122	229	106	0.447843604	1.591415416	3.360829807	0.089102395	0.295954241
FBgn0072317	2	6452750	6453753	+;+;+	876	100	142	71	39	40	37	105	52	71	64	86	18	-0.223477822	0.414111964	0.323472157	0.578950567	0.790859771
FBgn0072318	2	690428	693087	-;-;-	2542	4069	1482	4194	4879	2186	1321	3088	1898	2307	1161	3260	931	-0.708080794	5.587116571	7.248180121	0.019013513	0.12088808
FBgn0072321	3	10504613	10505147	+	535	735	126	300	279	236	12	189	172	178	35	200	174	-1.04700875	2.015844038	2.628211879	0.130429376	0.366835743
FBgn0072322	3	10515457	10517073	+;+	1560	5273	4499	2835	5241	1626	2078	4783	2297	2929	1424	4055	961	-0.503115546	5.822922789	13.52650606	0.00266328	0.038050195
FBgn0072326	3	10517775	10518469	-	695	45	34	18	36	5	10	39	40	44	7	81	15	0.276301213	-0.824585085	0.382084937	0.546868099	0.770314314
FBgn0072327	3	10518532	10519448	-;-;-;-;-	546	576	431	423	666	223	277	920	476	734	397	853	337	0.428398714	3.285242359	8.977442505	0.010036532	0.083045942
FBgn0072329	3	13474954	13477978	+;+;+;+;+;+	2725	8060	6425	4944	8638	2604	2736	9273	5405	7992	2917	9626	3118	0.056855404	6.734287787	0.402087196	0.53670445	0.764927537
FBgn0072330	3	8685551	8705458	+;+;+;+;+;+;+;+	2023	1357	1799	1594	1391	683	528	2014	1582	1346	682	2210	954	0.040329295	4.652039949	0.057250385	0.814522089	0.916984322
FBgn0072332	3	8626810	8628788	-;-;-	1845	42598	32309	20591	37891	14336	17387	39986	23561	21667	14978	41297	13385	-0.154407563	8.930356072	2.049060698	0.175243019	0.429654006
FBgn0072337	3	8530437	8533088	+;+;+;+;+;+	1624	31794	28632	15833	27271	12431	14656	34433	18087	17592	11760	31099	12385	-0.14264347	8.628999341	1.223863827	0.288098549	0.56118082
FBgn0072338	3	8490415	8491839	-;-;-	1152	0	29	6	0	0	0	41	5	13	22	41	27	2.317283187	-1.615383206	4.295533105	0.058060128	0.231739614
FBgn0072342	XR_group6	155232	157255	+;+;+;+;+	1776	18	81	4	40	22	216	194	62	58	33	57	58	0.265353593	0.630426061	0.073349836	0.790982613	0.904833837
FBgn0072343	2	7920685	7923271	+	2587	2515	2492	1990	2365	550	883	3198	2138	2668	1296	3366	1592	0.306906394	5.254571773	4.293485559	0.058112412	0.231739614
FBgn0072344	XR_group6	240622	241936	+	1315	7	20	8	211	6	6	58	184	83	2	212	28	0.401950708	0.182497586	0.146288487	0.70849226	0.863417723
FBgn0072347	XR_group6	627444	629992	-;-;-;-;-;-;-	2129	0	0	0	0	10	34	12	0	32	4	10	0	1.056257896	-2.223412921	0.269180303	0.612648203	0.81245726
FBgn0072348	XR_group6	651394	679790	+;+;+;+;+;+;+;+;+;+;+;+;+;+;+;+;+;+	10461	4815	3779	2232	4138	1164	1243	4304	2354	3273	1800	4152	1384	-0.019034393	5.683487306	0.02128516	0.886179968	0.949936868
FBgn0072349	XR_group6	682317	684454	+;+;+	1859	6755	2585	3687	4350	1005	1427	4662	4934	6077	2481	2805	3336	0.334062918	6.103652622	1.348011982	0.268061083	0.541616883
FBgn0072352	XR_group6	807563	845736	-;-;-;-;-;-;-;-;-;-;-;-	4729	19	23	6	67	4	7	210	8	42	10	300	4	1.975188594	-0.192526327	5.111553188	0.04139023	0.190205977
FBgn0072354	2	17343654	17352437	+;+;+;+;+;+	5456	4631	3665	2496	5155	1550	1383	4396	3102	3883	1944	4113	1490	-0.019235842	5.82969148	0.030780772	0.863357777	0.939679483
FBgn0072356	XR_group6	956073	959088	-;-;-;-	2821	11139	7890	5791	11376	4640	4841	12100	6315	7266	4416	10680	3806	-0.093568789	7.115644335	1.240194388	0.285040463	0.557900537
FBgn0072357	XR_group6	1026089	1026668	-	580	5681	5697	2682	5173	2143	2076	7495	4376	4388	2595	7354	3206	0.254546124	6.332679854	3.716875049	0.075362131	0.269594914
FBgn0072358	XR_group6	1051867	1052511	+	645	1802	2098	1009	1793	939	896	2718	1404	1730	953	2563	1047	0.168461218	4.876570662	1.33246019	0.268569949	0.542169113
FBgn0072359	XR_group6	7290443	7305886	-;-;-;-	1963	11	2	0	7	3	0	24	12	24	14	17	11	2.60919878	-2.141954172	11.75255637	0.004325039	0.051369915
FBgn0072361	XR_group6	7320791	7329482	+;+;+;+;+;+;+;+;+;+	2771	137	83	59	53	42	8	83	55	78	12	27	9	-0.707425859	-0.030958555	1.76152934	0.206637559	0.470306187
FBgn0072362	XR_group6	7265202	7266265	-	1064	334	375	124	1121	102	123	1103	644	1010	453	1077	424	1.245146869	3.319039324	12.19679959	0.004086484	0.049931943
FBgn0072364	XR_group6	4717545	4718266	-	722	221	257	240	267	126	117	314	222	307	97	276	176	-0.073506459	2.062032815	0.138844702	0.715268296	0.866904231
FBgn0072368	2	554723	555637	-;-;-	805	4393	615	1679	4862	1792	1720	4204	2268	3858	1705	4127	1236	0.278866294	5.620060092	0.72670581	0.410692236	0.671098895
FBgn0072370	3	15425905	15427526	+;+	1567	161	154	74	130	88	49	168	148	112	78	110	42	-0.003092522	1.062477922	0.000121303	0.991374983	0.996327109
FBgn0072371	3	15267958	15337502	-;-;-;-;-;-;-;-;-	9266	557	592	857	973	310	270	680	878	1086	164	1088	1058	-0.05926404	3.783337751	0.065967101	0.801209147	0.910433945
FBgn0072372	3	15310440	15312521	-	2082	6775	6779	5563	11593	3068	4030	8193	3864	4290	2373	7409	1987	-0.574409563	6.641430291	13.06418438	0.003011466	0.041057409
FBgn0072374	3	15427506	15431217	-;-;-	1518	188	141	102	231	45	76	205	142	173	124	153	54	0.188399939	1.337487498	0.555531821	0.46895812	0.715044763
FBgn0072376	3	15518114	15520171	-;-;-;-;-	1798	22114	19642	10521	15395	8224	8039	22908	12808	14138	7656	22049	8198	-0.043322006	8.035855153	0.124647973	0.729547346	0.874682602
FBgn0072377	3	15550699	15555069	-;-;-;-;-	3856	41768	30961	19811	32614	18149	17521	78221	44304	40470	29235	74887	30562	0.826768233	9.466535919	39.45819351	2.48E-05	0.001877165
FBgn0072380	3	14856131	14868019	-;-;-;-;-;-;-	3444	1323	1247	1135	1684	575	340	1192	1135	1176	349	1342	1270	-0.2070207	4.332985999	1.011708708	0.332338836	0.601319909
FBgn0072381	3	4028462	4029606	+;+	694	1067	439	692	769	215	245	921	991	1235	288	1226	780	0.417902227	3.760097219	4.326544155	0.057275058	0.230087194
FBgn0072382	3	4029702	4030444	+;+	682	17	16	13	15	9	34	17	23	27	3	59	27	-0.157035785	-1.122386903	0.04247719	0.8398159	0.929081408
FBgn0072386	3	4076838	4077741	+;+;+;+	730	28	17	8	6	15	9	16	0	5	4	5	4	-1.272253015	-2.172547302	3.15404664	0.098473918	0.313524047
FBgn0072387	3	4062231	4070796	-;-;-;-;-;-;-;-;-;-;-;-;-;-;-;-;-;-;-	7321	4304	3640	2502	4508	1941	1276	4975	3443	4818	2366	4427	1326	0.181454139	5.907650455	1.521882864	0.238567514	0.507621271
FBgn0072392	3	4219138	4225058	-;-;-;-;-;-	5617	1556	642	645	917	337	328	1168	1589	1082	496	1409	527	0.454063105	4.007689617	4.491038108	0.053315783	0.221075355
FBgn0072393	3	17461517	17464109	+;+;+;+;+;+	1959	12	6	4	2	22	4	44	63	64	57	38	22	2.766371184	-0.713206258	15.81571217	0.001496991	0.026174183
FBgn0072394	3	17475521	17476652	+;+;+	1022	2557	2654	1324	2819	1167	1293	2646	1505	1769	904	2535	745	-0.335590474	5.069057721	7.513653624	0.016461268	0.111184809
FBgn0072398	XL_group3a	905388	907883	+;+;+;+;+;+	1560	4232	2405	1933	3347	1235	1277	3424	2490	3518	1083	3975	1297	-0.012012372	5.490342051	0.011213399	0.917238187	0.963347285
FBgn0072399	3	3275534	3277077	+;+;+;+;+	1320	18438	16154	9405	16492	8251	9746	12422	7710	7413	4257	12296	4018	-0.824440034	7.637517756	44.51094606	1.33E-05	0.001326349
FBgn0072402	3	9123981	9128453	+;+	4416	13416	11885	9717	12082	7262	6195	19519	11690	9462	6906	18324	6288	0.103561063	7.694759447	0.481448203	0.499637317	0.738915847
FBgn0072403	3	9135230	9140903	-;-;-;-	595	2501	1417	804	2098	898	981	2443	1055	1954	898	2365	905	0.150280517	4.800996969	1.171379667	0.298238682	0.571259981
FBgn0072406	3	9035751	9036167	+;+	358	2654	589	1003	1197	334	318	1552	1054	2168	132	2027	721	-0.067385088	4.262744648	0.024076776	0.87929944	0.946794052
FBgn0072407	3	9012001	9012880	-	880	1258	1294	731	1379	553	553	1449	837	1171	530	1492	443	-0.08697257	4.150340774	0.530603942	0.478909169	0.723263646
FBgn0072408	3	295086	297477	+;+;+;+	789	7093	5452	3716	5493	2356	2598	6098	3236	3383	2229	5418	2243	-0.305470434	6.247247869	7.20778355	0.018351324	0.11842087
FBgn0072409	3	1740598	1742063	+;+;+;+;+;+;+	1085	8	6	38	18	0	0	32	15	16	6	20	2	0.403282861	-1.861244562	0.225803915	0.642316504	0.827671011
FBgn0072411	3	7662277	7662921	+;+	581	2840	2614	1558	2517	1108	1252	2785	1402	1860	934	2860	1016	-0.261841661	5.12546709	5.044302195	0.042185278	0.192474427
FBgn0072412	3	1778260	1780486	-;-;-;-;-	1081	40	76	7	29	2	5	48	30	193	7	126	75	0.872079002	-0.06417665	1.922405922	0.188261526	0.44518852
FBgn0072413	3	7613518	7614565	-;-;-;-	865	4729	3129	4204	3988	2577	2504	2447	1648	1953	764	2038	740	-1.387410192	5.649488315	55.15773879	4.22E-06	0.000589606
FBgn0072415	3	7745818	7748124	+;+;+;+;+;+	1971	11155	7169	9281	7187	6063	2900	12136	7971	11815	6090	14519	5748	0.249589315	7.33119527	1.328517221	0.270295394	0.543372288
FBgn0072417	3	18543209	18546203	+;+	2934	13	0	4	4	2	0	0	19	2	4	17	6	1.036741068	-2.783592886	0.8381818	0.376123085	0.643237045
FBgn0072418	3	18415673	18416387	-;-	632	0	23	4	0	2	0	18	13	15	11	9	6	1.3185369	-2.357142036	1.761841381	0.20659973	0.470292969
FBgn0072419	3	18299495	18355770	-;-;-;-;-;-;-;-;-;-	3300	56	108	97	97	69	19	132	77	90	79	152	28	0.141697437	0.690464508	0.128243475	0.725846923	0.872599304
FBgn0072420	3	12246819	12263559	+;+;+;+;+;+;+;+;+;+;+;+;+	3465	1508	461	630	781	229	231	1095	1212	1269	284	1874	872	0.543528827	3.946194466	4.078465206	0.063955676	0.244677525
FBgn0072421	3	18290733	18293323	-;-	2526	20437	17340	10574	20551	8176	8079	15602	9000	10723	6414	15775	4981	-0.506556179	7.821979851	38.06640566	2.98E-05	0.002131486
FBgn0072422	3	18280377	18281089	-	713	11873	10022	5806	10670	4466	4732	10293	5765	6575	3757	11413	3566	-0.294743135	7.08214419	8.771312849	0.010735261	0.086133002
FBgn0072424	3	18250797	18252741	-;-;-;-;-	1222	24233	9453	11810	14533	6002	5233	14098	9409	11806	3655	15073	5377	-0.421012848	7.600365142	6.431901504	0.024401926	0.140655843
FBgn0072425	3	17261703	17282879	-;-;-;-;-;-;-;-;-	2153	253	185	230	188	49	63	260	165	345	142	254	178	0.421712192	1.863450441	2.572902056	0.132043848	0.370028055
FBgn0072426	3	17219032	17220254	-;-	1166	0	11	3	11	6	2	2	12	16	4	36	0	0.588454084	-2.414061477	0.343419168	0.567617027	0.783661523
FBgn0072429	2	1500347	1501136	-;-;-	674	987	738	558	911	328	321	744	556	660	308	836	283	-0.274245029	3.458814638	5.936101522	0.029497016	0.15822596
FBgn0072432	3	18254291	18256045	+;+	1659	0	2	12	2	13	0	8	2	20	4	11	2	0.06898983	-2.648709218	0.004345134	0.948418205	0.977297283
FBgn0072433	3	17179998	17201075	+;+;+;+;+;+;+	6949	339	132	269	331	70	81	290	316	279	28	510	183	-0.127110497	2.055637799	0.141762659	0.712438335	0.865975489
FBgn0072437	2	13909197	13938252	+;+;+;+;+;+;+;+;+	6185	1099	1183	635	1305	636	508	1823	994	1242	666	1742	665	0.31047471	4.267103473	5.33663072	0.037422301	0.180558913
FBgn0072438	2	14266844	14267883	+;+	991	2422	1631	1364	2395	735	676	3243	1689	1908	1136	3210	1019	0.343065387	4.991962124	7.74022947	0.015206817	0.105649254
FBgn0072439	3	12268999	12270165	+;+;+	1051	1418	933	536	2360	372	250	949	563	637	309	785	255	-0.659946128	3.724483826	6.586733774	0.023027446	0.136317655
FBgn0072440	2	13903408	13904593	+;+;+;+	989	9034	8452	4543	8488	3593	4028	11397	6402	7587	4261	12253	3810	0.162580628	6.993993082	2.443297472	0.141364042	0.384057285
FBgn0072441	2	13901996	13903292	+;+;+;+	1104	13777	13160	6803	11930	5923	6166	17825	10374	11050	6229	18001	7731	0.198859322	7.639226523	2.384240329	0.14588124	0.390763773
FBgn0072442	2	14327068	14328331	-;-;-;-	1069	1467	1320	622	1951	643	504	2161	1500	1878	846	2050	1052	0.531412969	4.605351122	12.80724361	0.003227616	0.042903673
FBgn0072443	2	14331920	14335446	-;-;-;-;-;-;-;-	2524	3125	2405	2190	4019	1442	1389	3221	1648	2326	1256	3221	1292	-0.261308915	5.411286412	5.023288185	0.042554432	0.193617391
FBgn0072444	2	14474951	14477277	-;-;-	2194	3255	2484	2690	3950	1475	1362	4027	2232	3159	1289	3575	1333	-0.129206151	5.558932135	1.183125811	0.295926912	0.568224815
FBgn0072445	2	14544207	14555348	+;+;+;+;+	1594	1875	789	1668	1203	441	642	2722	1561	1681	1418	2538	1613	0.755775542	4.864244342	7.760311926	0.015794541	0.108500667
FBgn0072446	2	14478431	14480744	-	2314	446	111	303	397	132	109	93	112	87	5	155	179	-1.975015005	1.76510232	11.86514542	0.004284541	0.051077159
FBgn0072447	2	14534349	14535148	-;-;-	670	383	413	173	293	336	155	433	250	434	142	381	164	-0.114316167	2.509803567	0.163001145	0.692786938	0.85303167
FBgn0072449	2	14124325	14126882	+	2558	547	28	231	287	66	60	303	254	339	128	377	221	0.430441675	2.090823809	0.793405281	0.389436738	0.654568101
FBgn0072450	2	14131668	14133328	+;+;+	1533	13213	8337	4495	9667	4641	6143	14914	9808	8935	6976	14738	6585	0.455223936	7.411541045	9.755893995	0.00783391	0.071833796
FBgn0072452	2	18628605	18629357	-;-	686	0	6	14	13	2	2	17	28	33	6	17	11	1.262829606	-1.903309582	3.430576882	0.086187219	0.290195252
FBgn0072454	2	18598657	18599760	-;-;-	972	2	11	14	8	2	21	22	23	8	18	24	11	0.621866509	-1.671460166	0.718373519	0.411583598	0.671770951
FBgn0072455	2	18596845	18598178	-;-;-	1219	288	305	170	237	128	147	310	202	352	128	336	129	0.021628127	2.095562195	0.012225331	0.913600123	0.962009298
FBgn0072456	2	18461356	18465519	-;-;-;-;-;-;-	2965	8652	10655	4480	10398	3486	3194	8061	4263	5366	2844	6978	2030	-0.537336881	6.720471912	13.37526247	0.002771796	0.038974882
FBgn0072457	2	18451709	18453925	-;-;-;-	1083	9	730	3421	2703	2470	2577	30	10918	5035	24	4372	3820	-0.98052797	6.000648945	0.186590369	0.674536724	0.843142201
FBgn0072458	3	6170958	6172569	-;-;-;-;-	1368	1775	1512	975	2562	935	932	2435	1397	2371	1262	2379	654	0.250452725	4.881009971	3.009856362	0.105721778	0.326273536
FBgn0072459	2	22278508	22317740	-;-;-;-;-;-;-	6317	2689	1665	1718	3605	1172	872	3665	2230	3919	1851	3536	793	0.407575155	5.374872792	4.538133718	0.052242687	0.217670451
FBgn0072461	2	18448776	18449380	+;+	550	3220	4527	1974	2843	1723	1600	2578	1495	1882	850	2629	759	-0.831479764	5.346309892	22.9717623	0.000324419	0.010276042
FBgn0072462	2	30711418	30737050	+;+;+;+;+;+;+	3797	1685	819	1030	1290	391	325	989	947	1307	294	1435	622	-0.229800044	4.049822302	1.797622204	0.202320745	0.464827333
FBgn0072463	2	30709300	30711187	+	1888	1409	1107	825	1021	676	1128	921	686	747	412	1310	389	-0.652004095	4.123191996	8.083098042	0.013514094	0.099141606
FBgn0072464	2	22276946	22278415	+;+	1393	5619	3667	3218	5086	1556	1850	5541	3609	4456	1638	5088	1671	-0.066610423	5.999431567	0.382077226	0.546872088	0.770314314
FBgn0072465	2	1691678	1697372	-;-;-;-	3549	0	4	5	9	2	4	40	21	32	11	24	13	2.270988321	-1.803434935	11.39405637	0.004792484	0.054315461
FBgn0072466	2	1690764	1691230	-;-	385	1217	1207	549	1067	436	411	1307	523	933	420	1219	423	-0.1107189	3.865127697	0.510805124	0.487074237	0.728770145
FBgn0072467	3	12271108	12276735	+;+;+;+	2574	1825	1466	846	1431	511	532	1452	1125	1220	709	1647	817	0.062571797	4.38405276	0.217439412	0.648498972	0.831078276
FBgn0072468	2	1689379	1690833	+;+;+	1298	8668	7857	4994	8371	3230	3481	8128	4208	5848	2824	7158	2268	-0.374889363	6.670420746	14.92408896	0.001862241	0.030288748
FBgn0072469	2	1636763	1638252	-	1490	5706	933	2957	3165	810	1078	1870	3130	3712	460	3103	2140	-0.431857175	5.451799197	1.141095394	0.307294944	0.580182651
FBgn0072471	2	1643140	1647654	+;+;+	1004	82	40	83	72	18	41	54	101	56	24	69	136	0.053346539	0.448656861	0.013000872	0.910914122	0.961106014
FBgn0072476	2	10024985	10034106	+;+;+;+;+;+	3336	265	163	50	290	36	32	193	76	113	93	199	72	0.083654495	1.185158737	0.051705365	0.823559711	0.92130968
FBgn0072478	2	10965916	10968667	-;-;-;-;-	2513	12	22	0	22	4	14	41	17	19	9	41	22	0.935368596	-1.41772143	1.575975631	0.230824208	0.498538681
FBgn0072482	Unknown_group_4	128534	134483	+;+;+;+;+;+;+;+;+;+;+	2716	3795	2448	1579	2370	2360	593	5049	3311	2951	1978	5168	2528	0.643636037	5.741199641	4.872749957	0.047027592	0.205197341
FBgn0072483	Unknown_group_4	69693	71890	-	2198	0	2	0	100	14	4	18	0	9	2	26	0	-0.782553735	-1.869988749	0.295345116	0.595929508	0.802385102
FBgn0072484	2	18022746	18025906	-;-;-	2655	360	751	630	440	276	232	672	535	655	244	584	237	-0.151667773	3.158495583	0.394016717	0.540761391	0.76693959
FBgn0072488	Unknown_group_4	4795	34685	+;+;+;+;+;+;+;+;+	2924	14211	16963	9832	15483	6886	10763	14789	9094	8564	5166	14569	5759	-0.520249189	7.716990653	9.229056323	0.009254037	0.079337289
FBgn0072490	2	18021235	18021927	+;+	565	4062	2667	1857	3436	1726	2015	4048	2527	3583	1372	4414	1969	0.054484412	5.713328952	0.139317795	0.714807165	0.866829142
FBgn0072495	XR_group3a	19973	22513	-	2541	413	279	153	296	103	135	292	213	302	154	340	127	0.057012236	2.103520031	0.102003947	0.754369877	0.88770374
FBgn0072498	XR_group3a	1194451	1200072	-;-;-;-	1285	0	0	4	0	2	0	33	25	32	13	16	18	4.076801994	-1.929553461	18.31331349	0.0008422	0.018489383
FBgn0072499	XR_group3a	1175211	1185720	-;-;-;-;-;-;-;-;-	3609	232	145	75	273	55	69	184	437	171	80	661	266	0.827554367	2.003346328	4.312180504	0.057637105	0.231036069
FBgn0072506	4_group3	1016296	1017593	+	1298	111	134	167	258	87	91	154	127	147	91	194	78	-0.235788537	1.409505484	0.767482856	0.396453008	0.660208883
FBgn0072507	4_group3	1214912	1216027	+	1116	812	388	433	609	187	224	475	353	432	284	483	136	-0.279840691	2.877630766	2.091350162	0.171152002	0.424756583
FBgn0072508	4_group3	1209886	1212333	+;+;+;+	2191	0	7	0	6	0	2	14	13	19	2	19	13	1.916014203	-2.473288572	4.698846413	0.048768779	0.208580973
FBgn0072509	4_group3	1212327	1213174	-	848	53	131	58	0	69	27	249	112	138	50	133	70	0.777836545	0.800946212	1.080091165	0.318173289	0.589270004
FBgn0072510	4_group1	4383159	4384762	-;-	1552	16372	13430	8379	15671	7110	5969	17896	9278	11513	6078	17025	5421	-0.086493073	7.669011851	0.915851156	0.355540363	0.623575508
FBgn0072511	XR_group6	10991153	10996853	+;+;+	1218	3753	2713	2006	3513	1264	1477	2623	1433	1839	1025	2938	995	-0.522789344	5.290409414	28.2856444	0.000126433	0.005644117
FBgn0072512	XR_group6	10940542	10956042	-;-;-;-;-;-;-	2458	3417	1830	1670	2853	880	1075	3045	2707	2708	1130	3880	1709	0.266619456	5.34880978	4.551794212	0.051936236	0.216762574
FBgn0072513	XR_group6	11008200	11012793	-;-;-;-;-	3570	753	445	301	978	145	144	313	186	208	260	292	109	-0.765819016	2.608828637	7.561936338	0.016184131	0.110118649
FBgn0072514	XR_group6	11185501	11187717	-;-;-;-	2015	27170	23155	15198	26676	11723	13910	36837	20602	18874	13225	36907	16703	0.190143682	8.670515271	1.662759213	0.219076923	0.486113123
FBgn0072516	XR_group6	11396668	11414673	-;-;-	3294	1625	1658	1517	217	498	199	988	270	184	258	297	432	-1.256807874	3.714864423	4.568385837	0.054930647	0.224788636
FBgn0072517	XR_group8	3050954	3053270	+;+;+	736	88	52	82	46	2	2	13	97	158	0	46	269	-0.866586772	0.633450884	0.852196613	0.372797125	0.640008343
FBgn0072519	XR_group8	2984180	2986124	-;-	848	95	26	58	75	28	7	30	21	24	19	40	56	-0.555847524	-0.32536508	1.01157445	0.332369785	0.601319909
FBgn0072520	XR_group8	2975805	2982574	-;-	6708	2	14	4	23	13	4	26	11	13	8	10	2	0.166150395	-2.081276222	0.063762535	0.804482828	0.911335237
FBgn0072521	3	6174854	6179069	-;-;-;-;-;-	3843	19831	19628	13909	20689	8376	9231	23894	14479	15627	9249	22796	8086	-0.079257607	8.163191541	0.595126036	0.453853395	0.703954463
FBgn0072523	XR_group8	2827066	2829661	-	2596	75	43	31	40	21	10	78	25	27	17	53	7	-0.189238261	-0.618723919	0.204696048	0.658205411	0.83573391
FBgn0072526	XR_group8	2744622	2746676	-	2055	21	2	14	13	0	2	5	2	3	10	10	7	-0.171083494	-2.523791217	0.041138647	0.842322461	0.930178725
FBgn0072529	XL_group1e	6153363	6160017	-;-;-;-;-	6307	486	206	258	550	104	86	206	207	269	140	313	66	-0.447388305	2.08565532	2.505463463	0.136795197	0.377156196
FBgn0072534	XR_group6	9341982	9344120	+;+;+;+	1951	0	6	6	30	5	16	0	0	0	2	11	0	-2.326535418	-2.671228079	3.561333465	0.081025854	0.280349267
FBgn0072539	XR_group6	9179095	9180126	+	1032	11010	9677	5833	9768	3944	5134	12833	6847	6478	4639	12295	5184	0.012845414	7.178937204	0.008737405	0.926912206	0.968931725
FBgn0072540	XR_group6	5695333	5700134	+;+	770	23	18	110	157	72	26	54	35	68	29	77	26	-0.763482935	0.223648201	1.885366749	0.192300206	0.451214097
FBgn0072541	XR_group6	5790974	5792902	-	1929	643	355	217	550	169	147	257	255	267	133	388	229	-0.428314719	2.463485241	3.630360434	0.078451396	0.275649678
FBgn0072543	4_group1	1205655	1213495	+;+	3258	143	73	50	141	31	26	154	89	63	65	184	48	0.46670452	0.666128076	2.338702111	0.149487627	0.396304112
FBgn0072547	3	9652072	9664991	-;-;-;-;-;-;-;-;-;-	3806	9	28	48	25	18	33	45	37	14	19	25	13	-0.386606572	-0.804067893	0.462202898	0.508189023	0.744961791
FBgn0072548	3	9621734	9624410	-;-;-;-;-;-	2375	6	29	9	39	2	6	4	22	19	13	38	5	0.143746409	-1.633528165	0.046020587	0.833373441	0.926367683
FBgn0072549	3	13614035	13614892	+;+	801	1594	929	683	1067	469	448	1711	858	1477	647	1325	479	0.286313149	4.135424557	4.566065054	0.051618369	0.216149245
FBgn0072550	3	9625376	9626430	+;+;+;+	863	10790	10357	5001	9768	3515	3624	11717	6116	7072	4007	9954	3434	-0.080812351	6.999632056	0.478263614	0.501034572	0.740106215
FBgn0072551	3	613129	613895	-	767	24	10	49	163	122	10	53	42	20	26	73	27	-0.647767915	0.102490552	0.76041056	0.398578455	0.661908839
FBgn0072553	3	13941493	13942020	+;+	477	806	726	519	1110	189	288	602	581	738	221	793	366	-0.291162471	3.37443824	3.59472615	0.07976794	0.277810051
FBgn0072554	XL_group3a	2149643	2183834	+;+;+;+;+;+;+;+;+;+;+	4368	1938	1234	510	1391	869	988	2019	968	1953	606	2203	624	0.203642512	4.54370874	0.814962776	0.382622092	0.649211028
FBgn0072556	XL_group3a	2191755	2193007	-;-;-	1133	337	333	208	435	128	98	442	243	490	126	276	206	0.094645287	2.333222013	0.194454384	0.666276443	0.838677909
FBgn0072557	XL_group1e	7636965	7639128	+;+;+;+;+	1650	419	353	174	412	178	172	416	203	435	214	560	142	0.160008265	2.487296853	0.739766322	0.404884263	0.666777741
FBgn0072558	4_group5	1162650	1164297	-	1648	307	225	194	375	131	74	342	215	357	143	323	168	0.187654297	2.129744316	0.877334717	0.365532714	0.632434803
FBgn0072560	4_group5	372803	400701	+;+;+;+;+;+;+;+;+;+;+;+;+	5235	1321	478	947	696	483	541	884	721	526	408	811	336	-0.397662695	3.723140745	2.467567533	0.139558133	0.381125009
FBgn0072561	4_group5	401057	402801	-;-	1682	483	430	263	541	236	168	608	395	575	292	635	165	0.27433826	2.866577119	2.897845318	0.111804328	0.337431873
FBgn0072562	4_group5	451045	453092	-;-;-	1925	215	276	108	262	118	68	276	167	208	99	207	40	-0.150108251	1.626582951	0.294090595	0.59652831	0.802896929
FBgn0072563	4_group1	3637754	3639235	-;-	1417	4128	3346	1915	4175	3194	1758	4176	2320	2759	1583	3951	1181	-0.275432613	5.770736299	2.730102801	0.121735427	0.353415341
FBgn0072565	4_group2	660683	666356	+;+;+;+	5060	3780	1801	1707	2846	1144	784	3112	1995	3155	1230	3147	1525	0.191282834	5.307475201	1.728295316	0.210718328	0.475559731
FBgn0072566	4_group2	667018	667511	+;+	427	8220	6886	3181	8482	3317	3279	6781	3826	5879	2371	6221	2566	-0.322683685	6.537357077	8.028687939	0.013767461	0.100448438
FBgn0072568	4_group2	675915	703685	-;-;-;-;-;-	1653	69	33	103	133	13	20	66	81	60	21	56	104	-0.110769342	0.332501917	0.064601902	0.803229379	0.911177088
FBgn0072569	4_group2	720850	794174	-;-;-;-;-;-;-	4600	209	163	81	395	42	154	250	275	178	129	301	280	0.48408678	1.987469865	1.411684496	0.255440242	0.528327114
FBgn0072570	4_group3	887260	906184	+;+;+;+;+;+	5321	15346	15720	9387	16493	7534	7668	22167	13497	14621	8306	22172	10484	0.229305549	7.994490104	3.427009484	0.086333503	0.290554574
FBgn0072572	4_group3	853067	856286	+;+;+;+	3049	240	77	104	93	81	105	227	145	116	210	206	181	0.810503325	1.634513777	4.483545125	0.053488918	0.221580596
FBgn0072574	4_group1	4221397	4230677	-;-;-;-;-;-	3734	44	13	0	13	0	5	94	20	24	10	38	11	1.776789073	-1.308960812	4.411290124	0.055193199	0.225298086
FBgn0072583	4_group3	1615811	1621079	-;-;-;-;-;-;-;-;-;-;-	2937	289	115	110	281	34	42	100	108	86	76	180	70	-0.317485087	1.141448442	0.848071863	0.373405122	0.640702603
FBgn0072584	3	9590729	9592216	-	1488	12478	11541	6812	11990	4467	5049	11519	6541	6075	3828	9636	3332	-0.437192132	7.151435557	15.20038081	0.001739048	0.029123601
FBgn0072585	XR_group6	12357437	12416381	+;+;+;+;+	7257	2788	1605	1368	2375	777	635	2004	1740	1628	663	2270	1028	-0.128637958	4.824319118	0.91631054	0.355423622	0.623456539
FBgn0072586	XR_group6	12220634	12242049	+;+;+;+	2137	30	4	1	8	0	10	61	79	49	29	28	25	2.846441785	-0.888211432	12.58899343	0.003425399	0.044481723
FBgn0072588	XR_group6	12202582	12203841	+;+	1204	5	74	0	53	0	2	255	56	341	6	62	21	2.190387383	0.226575734	4.144682934	0.064473447	0.245834001
FBgn0072589	XR_group6	12198214	12198986	+;+	715	795	560	326	753	203	221	837	404	530	280	756	309	0.116338638	3.151383401	0.611276128	0.44792319	0.699484093
FBgn0072590	XR_group6	12163937	12174278	+;+;+;+;+	5723	40	1117	181	180	12	28	73	60	158	21	200	49	-1.560793749	1.628622264	5.610800862	0.035032289	0.174472442
FBgn0072591	3	9601870	9603056	-;-;-	1059	377	351	356	598	185	274	501	388	625	339	571	233	0.234111434	2.935901731	1.278203404	0.278093072	0.55143837
FBgn0072594	XR_group6	2086762	2089361	+;+	2535	9	44	18	35	28	14	4	13	11	7	17	1	-1.669864881	-1.444800584	6.494033816	0.02383913	0.138834893
FBgn0072596	2	3006924	3007849	+;+;+	791	407	433	451	1745	151	294	769	1465	621	521	1318	1200	0.777857567	3.91457322	3.164260181	0.101016571	0.317898088
FBgn0072599	2	9567278	9569456	-;-;-;-;-	1429	262	177	132	218	109	100	144	224	298	85	222	115	-0.040038708	1.723839116	0.024879657	0.877022963	0.945798976
FBgn0072600	2	9685255	9686060	+;+	749	839	726	622	672	236	230	666	385	647	206	490	141	-0.553476653	3.134732343	7.068650348	0.019294189	0.121995677
FBgn0072601	2	3073937	3111638	-;-;-;-;-;-;-;-;-;-;-	2419	90	159	21	63	14	84	202	93	169	108	201	53	0.890484465	0.971425424	3.668510214	0.07707075	0.272977253
FBgn0072602	2	6017308	6020116	+;+;+;+;+;+	1300	3432	1656	1360	2747	377	776	2528	2774	4006	1318	3634	1744	0.610388321	5.288449393	7.035079244	0.019816079	0.123898998
FBgn0072609	2	6240753	6241775	+;+;+	917	11	9	11	5	1	0	6	6	20	3	7	16	0.311277491	-2.420499589	0.191246457	0.668857133	0.840007016
FBgn0072611	2	4171083	4172309	-;-	1177	8602	6497	5515	8841	3776	5657	11671	5865	5927	4130	10329	4019	-0.005796357	6.991741642	0.00140525	0.970650532	0.986912036
FBgn0072613	2	13825927	13837486	+;+;+;+	3167	10	20	0	2	0	14	33	20	15	9	27	28	1.336175025	-1.633958695	1.929356732	0.187515744	0.444200602
FBgn0072614	2	13838287	13839855	+;+;+	1444	425	336	243	360	240	85	517	390	541	218	633	247	0.462838605	2.704107313	4.362424672	0.056382419	0.228312264
FBgn0072616	3	6158325	6158728	-	404	16	2	2	8	4	93	83	49	336	12	230	291	1.950381421	0.982605476	1.110555825	0.313657779	0.585646045
FBgn0072617	2	13856413	13858742	+;+;+;+;+;+;+	1848	4231	3066	2109	3745	1555	1833	4221	2615	3199	1818	4550	1310	0.027989395	5.712113747	0.090370039	0.768327643	0.893603745
FBgn0072619	2	13858749	13861451	-;-;-;-;-;-;-;-	2278	12525	10873	7531	13227	5757	4878	12913	7036	8822	4785	12029	3059	-0.278831295	7.297755891	6.477649295	0.023986053	0.139112434
FBgn0072621	2	13873485	13875771	+;+	1580	266	28	99	113	43	34	111	71	110	73	92	39	-0.065639919	0.728412947	0.025985319	0.874344861	0.944633572
FBgn0072624	XL_group1e	3366362	3367281	+;+	846	164	355	88	222	55	67	243	168	179	47	112	92	-0.321751875	1.440076347	0.945853508	0.348032271	0.616169233
FBgn0072629	3	10273449	10274475	-	1027	422	338	289	570	184	151	471	285	385	160	432	129	-0.182554488	2.525037993	1.2401591	0.285047023	0.557900537
FBgn0072630	3	9858706	9860575	-;-;-	1755	2201	1010	1520	1578	436	375	1670	1415	2146	351	1700	1769	0.027649875	4.643205652	0.012820583	0.911541884	0.961492075
FBgn0072631	3	17736043	17736973	+;+;+;+	723	30	82	67	38	17	32	111	73	130	24	88	61	0.460509029	0.279984434	1.671868995	0.217889535	0.484649947
FBgn0072632	3	10298536	10300896	+;+;+;+	2174	12026	11252	6882	13075	5831	5744	12589	6662	7880	4588	11036	3355	-0.344973214	7.282566226	11.92440121	0.004119816	0.050172251
FBgn0072633	3	9865459	9867149	+	1691	6501	5204	3116	6700	2837	2690	5915	3724	4722	2278	5600	1713	-0.243602935	6.284091508	7.246552906	0.018098252	0.117458697
FBgn0072634	3	12898414	12900366	-	1953	20315	18200	12786	17782	7130	8593	15435	7809	6001	4795	13948	3950	-0.836113343	7.714021893	27.37784016	0.000147153	0.006135599
FBgn0072635	3	12799819	12800481	-;-	610	25	5017	13448	17106	11059	13031	111	50431	34273	36	19926	22020	-1.272840904	8.348128891	0.208361425	0.657384513	0.835655255
FBgn0072636	3	12832542	12833157	+;+	544	0	2	0	0	0	1	12	7	0	17	20	8	4.272427817	-2.786640575	13.61059872	0.002605072	0.037437074
FBgn0072637	XR_group8	938122	942756	-;-;-;-;-;-;-	1998	685	701	522	343	147	190	489	355	537	245	654	152	-0.230936453	2.926717454	0.845902414	0.373998801	0.641246835
FBgn0072638	XR_group8	1452896	1454158	-;-	1204	277	1033	176	1120	127	461	296	1053	278	122	273	124	-0.770266285	3.051026492	1.461514931	0.251023635	0.522862137
FBgn0072639	XR_group8	1440470	1441068	-;-	537	62	58	105	88	80	59	52	268	112	14	186	90	-0.155302295	0.979627869	0.066195839	0.800872854	0.910259205
FBgn0072640	XR_group8	1376278	1381050	-;-;-;-	834	934	637	470	1077	352	394	676	373	639	348	843	293	-0.30579056	3.436635408	4.788306285	0.046953814	0.205145692
FBgn0072643	XR_group8	1337763	1352722	-;-;-;-;-;-;-;-	8436	15	4	0	2	0	0	32	17	21	17	9	0	2.701704431	-2.261989086	7.663579495	0.015618296	0.107591893
FBgn0072645	XR_group6	10003484	10004885	-;-;-;-	1227	6614	5151	3401	6146	2986	2825	7945	4149	5116	2600	6913	2489	0.008031674	6.43339575	0.00746023	0.932449447	0.971047594
FBgn0072646	XR_group6	9998450	10000167	-;-;-	1320	6946	5304	3832	7884	2603	2541	7256	4976	5946	2766	7038	2922	0.018714637	6.51093104	0.056722415	0.815362045	0.917290108
FBgn0072647	XR_group6	6452902	6455430	+;+;+;+;+;+;+;+	2110	95	57	51	81	53	23	110	92	75	15	96	24	-0.068179661	0.246452301	0.030952096	0.862982214	0.939575284
FBgn0072648	XR_group6	6455587	6462891	+;+;+;+;+;+;+;+;+;+;+;+;+	6599	4743	4377	2467	3991	1990	1700	6577	3559	4822	2111	4997	1554	0.179285291	6.013844528	1.955532052	0.184740893	0.441322391
FBgn0072649	3	6521033	6525461	+;+;+;+;+;+;+;+;+;+;+;+;+;+	3356	114	66	78	88	82	41	240	141	167	51	140	34	0.487842822	0.937109258	2.015330135	0.178595226	0.433465179
FBgn0072650	XR_group6	6462874	6464185	+;+	1247	243	152	140	236	61	104	199	152	207	71	229	88	-0.132187117	1.527682555	0.413293396	0.53116604	0.760873464
FBgn0072651	XR_group3a	587908	588669	-	762	2749	2048	1038	2218	875	1046	3638	2551	2145	1313	4210	1711	0.590829872	5.280307413	16.05700081	0.001412862	0.025299773
FBgn0072652	XR_group3a	851458	852228	+;+	697	355	294	271	345	133	140	281	172	262	101	283	93	-0.540476699	2.076560828	10.15103759	0.0069335	0.067168394
FBgn0072653	XR_group3a	763017	771416	+;+;+;+;+;+	2204	1053	1134	703	1563	611	652	1361	1759	1181	550	2316	1565	0.37725044	4.540319786	2.060592974	0.174417856	0.428740768
FBgn0072654	XR_group8	4537124	4542760	+;+;+	2235	735	1036	559	930	516	267	1496	693	1155	586	1275	436	0.357059133	3.891186127	3.282275563	0.092529644	0.302130477
FBgn0072655	XR_group8	4525853	4529172	+;+;+;+	2914	2119	1271	784	2553	855	997	1765	1010	1118	620	1627	485	-0.359577872	4.531744359	7.435961595	0.016918916	0.112725681
FBgn0072656	XR_group8	4494282	4496199	+;+;+	1790	1004	1061	615	1147	935	555	874	522	555	269	651	202	-0.933290315	3.771565814	19.04012226	0.000718909	0.01673314
FBgn0072657	XR_group8	4393510	4400034	+;+;+;+;+;+;+;+;+;+;+;+	4366	2980	2333	1784	4372	1376	1385	3078	2310	3249	1402	3330	964	-0.058023569	5.439269026	0.183297051	0.675366331	0.843332787
FBgn0072658	XR_group6	10000588	10001437	+	850	2778	1677	1234	2711	1227	1187	1821	961	1643	739	2055	514	-0.550211397	4.834297224	18.90470904	0.000740211	0.017013275
FBgn0072659	XR_group6	9996871	9998563	+;+	1644	220	144	111	229	93	61	235	121	133	39	118	51	-0.424850399	1.231614993	2.474124538	0.139075154	0.380726335
FBgn0072661	XR_group6	6512630	6513530	+	901	68	245	42	91	4	6	12	235	30	0	112	564	-1.206233769	1.437094292	1.379320716	0.263079442	0.537125319
FBgn0072663	XR_group6	6484012	6487162	-	3151	3310	1392	1358	2308	605	672	1458	1430	1724	671	1755	1234	-0.239269954	4.76496527	1.425435918	0.253249601	0.526018511
FBgn0072666	XR_group8	5926054	5927016	+;+	904	222	33	38	136	14	24	53	49	29	0	60	27	-1.279714506	-0.054116221	2.506927099	0.136689851	0.377066316
FBgn0072667	XR_group8	894607	927751	-;-;-;-;-;-;-;-;-;-;-;-	4527	252	266	198	384	91	88	272	190	176	64	213	63	-0.541535482	1.75069101	5.57966338	0.033939563	0.171295656
FBgn0072668	XR_group8	777627	778355	-;-	675	248	485	230	367	105	76	275	158	190	142	256	46	-0.553279636	1.963003602	3.007604382	0.105840032	0.326393848
FBgn0072669	XR_group3a	666296	737765	+;+;+;+;+;+;+;+;+;+	3410	616	641	449	914	244	330	838	665	667	345	707	247	0.038646805	3.351301945	0.055496215	0.817328961	0.91786358
FBgn0072670	XR_group8	4123550	4145981	+;+;+;+;+;+;+	8149	21372	11198	8734	15129	3180	5001	2929	2391	2467	1409	3164	1329	-2.195264789	6.845643566	156.4390197	9.19E-09	7.11E-06
FBgn0072671	XR_group6	7807305	7808127	+;+	754	374	250	266	374	162	151	383	281	383	146	475	236	0.090561571	2.447734055	0.28320579	0.603333111	0.807062369
FBgn0072672	XR_group6	7811031	7813762	+;+;+	1452	144	112	59	96	74	30	147	66	171	56	96	50	0.126544949	0.784721868	0.154812425	0.700176546	0.857314958
FBgn0072673	XR_group8	4092602	4096760	-;-;-;-	3939	113	119	58	151	79	52	232	220	175	85	331	176	0.93883896	1.504462825	10.4515404	0.006328593	0.062887717
FBgn0072674	XR_group8	519456	520407	+	952	1757	1461	836	1515	708	697	2518	1720	2051	808	3236	771	0.503182909	4.745417997	13.96520202	0.002375246	0.035308952
FBgn0072675	XR_group6	5048164	5050333	+;+	2117	25	23	15	21	41	29	8	1	0	0	9	3	-3.054175721	-1.526627798	11.89782509	0.004150805	0.050384735
FBgn0072677	XR_group8	4168698	4169442	-;-	680	326	288	271	343	203	155	155	152	193	84	200	122	-0.974732336	2.037549858	18.62896589	0.00078588	0.017644703
FBgn0072678	XR_group8	4174500	4180562	-;-;-;-	2565	88	49	33	34	20	7	121	100	100	30	112	43	1.01529583	0.153622986	7.049086489	0.019431255	0.122577273
FBgn0072679	XR_group8	4177003	4179787	-	2785	1959	431	791	778	259	290	776	791	1002	213	1134	501	-0.223464958	3.709664743	0.531446767	0.478798729	0.723263646
FBgn0072680	XR_group8	4188770	4191254	-;-;-	1922	684	562	448	716	300	143	824	543	558	332	670	314	0.145910463	3.224011611	0.613280421	0.447196128	0.698938157
FBgn0072681	XR_group6	7834315	7837072	-;-;-;-;-	2445	53	80	30	55	18	41	81	34	40	37	82	23	0.011880889	-0.114021568	0.001075348	0.974324217	0.988620689
FBgn0072683	XR_group8	513438	516816	-;-;-;-	3186	1090	1057	841	1324	438	473	1157	943	1130	377	1294	679	-0.108413996	4.060297093	0.969153819	0.342359637	0.611856411
FBgn0072684	XR_group6	4995929	5000503	-;-;-;-	716	27	4	0	2	0	0	26	40	17	21	83	18	3.15684119	-1.384724997	10.1155167	0.007009341	0.067505695
FBgn0072686	XR_group6	5026273	5030894	-;-;-;-;-	1459	32	4	0	0	6	8	68	37	75	15	66	38	2.955464571	-0.846307797	8.518873514	0.01166941	0.091164161
FBgn0072687	XR_group6	5056742	5062387	-;-;-;-;-;-;-;-;-	1736	32	17	27	18	4	0	17	14	12	4	18	17	-0.415889622	-1.689120648	0.413517762	0.531056253	0.760846468
FBgn0072690	3	4431851	4432653	+	803	74	156	101	395	49	109	250	321	361	126	517	293	0.868881911	2.107898593	5.394564867	0.036555299	0.178249561
FBgn0072693	4_group3	5642690	5643449	+;+;+	636	5068	4876	3012	6223	2509	1919	7890	3933	5007	2684	7368	2839	0.243482039	6.338905179	4.562863228	0.051689485	0.216347524
FBgn0072694	2	1917248	1921298	-;-	3073	85	79	58	111	20	22	76	33	32	25	79	37	-0.438198272	0.020559483	1.639325953	0.222170295	0.48928102
FBgn0072695	4_group3	5645089	5648779	+;+;+;+	2870	1341	295	282	1435	90	95	644	478	775	135	826	353	-0.133410878	3.180904364	0.070442193	0.795236758	0.907108316
FBgn0072696	3	9341930	9342792	+	863	270	204	111	236	42	85	204	202	230	132	206	115	0.283246052	1.655346586	1.230374173	0.286874033	0.559983908
FBgn0072699	3	9268686	9336876	-;-;-;-;-;-;-;-;-	5751	39	63	127	76	48	45	138	107	146	58	103	75	0.347591359	0.785008285	0.863166069	0.369313232	0.63648245
FBgn0072700	3	9364789	9366021	-;-;-;-	1055	6	48	16	8	0	10	8	19	12	10	43	10	0.024890235	-1.5940576	0.001250338	0.972314703	0.987645291
FBgn0072702	XL_group1e	10402312	10406248	+;+;+;+;+;+;+;+	3446	687	650	376	881	282	255	653	518	683	298	784	313	-0.01542492	3.282194847	0.013697605	0.908569544	0.959778699
FBgn0072703	4_group4	3966617	4004342	-;-;-;-	2114	4	0	19	0	1	3	13	19	3	9	11	9	1.118949691	-2.411034959	1.285770827	0.276737561	0.550290355
FBgn0072707	4_group5	62438	63830	+;+	1335	202	683	326	436	101	183	525	255	377	100	463	215	-0.2860687	2.559399258	1.112523409	0.310209173	0.582390659
FBgn0072710	4_group4	3696977	3769923	+;+;+;+;+;+	5041	259	178	145	175	83	74	425	299	338	94	426	236	0.755068764	2.059960568	13.88263576	0.002426593	0.035675044
FBgn0072711	4_group4	3616990	3626781	-;-;-;-;-	1280	71	11	37	20	15	63	141	44	22	34	61	15	0.357886747	-0.191219068	0.407754697	0.533889859	0.762801639
FBgn0072712	4_group4	3594097	3602232	-;-;-;-;-	1608	4678	1366	1782	2514	618	835	2863	2356	2842	452	3689	1831	-0.015588899	5.229222034	0.00271523	0.959270595	0.981865519
FBgn0072713	XL_group1e	3383223	3384167	+;+	798	852	504	661	649	363	250	562	294	544	159	445	152	-0.828941426	3.074093612	16.3374196	0.001321858	0.024451035
FBgn0072719	4_group5	1915576	1918999	-;-;-	2424	219	148	175	220	113	81	121	216	128	97	301	68	-0.180549816	1.582711386	0.38131609	0.547266158	0.770375831
FBgn0072726	4_group1	17047	22869	-;-	5761	45892	46689	25053	45994	18830	24145	58584	33324	34230	24152	55201	22378	0.077435673	9.401212352	0.366384653	0.55511007	0.775324196
FBgn0072727	4_group1	316072	319143	+;+	3000	2	12	35	72	11	50	8	20	20	7	39	5	-1.319772942	-1.001728969	2.640185219	0.127505028	0.362520298
FBgn0072728	4_group1	193396	194143	-;-;-	594	19238	19584	8866	15949	7436	7754	22738	10814	13924	6639	18662	7943	-0.072433256	7.925061407	0.29457392	0.596229994	0.80256896
FBgn0072729	4_group1	199381	200061	-;-	623	839	558	470	977	296	392	1082	661	950	433	1045	443	0.319220878	3.642014812	6.253057855	0.026110868	0.146258705
FBgn0072730	4_group1	203964	211226	-;-;-;-;-	2678	740	98	125	139	47	10	257	177	151	84	166	109	0.031953217	1.561199516	0.002869073	0.958115737	0.981026619
FBgn0072735	4_group1	394891	396451	+	1561	844	751	610	1331	824	660	4466	2593	3096	1492	4625	1970	1.709898037	5.163583343	56.15098145	3.96E-06	0.000564389
FBgn0072738	4_group1	555779	557314	+;+	1477	1655	1669	1167	2219	749	761	2452	1328	1668	808	2169	688	0.024101233	4.711500567	0.042259627	0.840220471	0.92917085
FBgn0072739	4_group1	679904	681926	+;+	1971	6241	4665	3178	5905	2650	2139	4597	2441	3250	1750	4078	1211	-0.580639226	6.008560513	37.67418516	3.14E-05	0.002203547
FBgn0072740	4_group4	3075510	3076724	+;+;+;+;+	963	4	5	0	0	20	0	10	19	11	2	15	0	1.2502175	-2.522340444	0.736030217	0.406041966	0.666969667
FBgn0072741	2	13149941	13153893	+;+;+;+;+;+;+;+	3393	2545	2221	1535	2874	804	1062	2524	1728	2618	1162	2908	731	-0.012157663	5.091359515	0.008045883	0.929855411	0.970132426
FBgn0072742	4_group4	3263159	3264620	+;+	1399	29586	22891	13047	25113	9409	11156	25714	13676	14719	8586	23179	9103	-0.281979011	8.292188076	7.504747406	0.016512991	0.111184809
FBgn0072744	4_group1	4878035	4879035	-	1001	59	8	25	20	6	2	15	2	2	2	22	3	-1.488600562	-1.888723059	3.987862305	0.066586825	0.250189401
FBgn0072745	4_group1	4864100	4866496	-;-;-;-	2149	129	82	27	89	58	48	82	63	93	30	93	54	-0.082271637	0.442701373	0.051003114	0.824740159	0.921838563
FBgn0072746	4_group1	4862871	4864090	-;-	1169	3764	2676	1932	4041	1701	1528	4451	2559	3285	1459	4302	1316	0.050445425	5.642673097	0.267735959	0.613302471	0.813023065
FBgn0072747	4_group4	3295228	3296496	-;-	1206	10754	5511	4406	9345	4469	2096	8948	4778	4777	3006	8079	3388	-0.142183724	6.716625715	0.666036594	0.428727827	0.684501097
FBgn0072749	4_group1	4844569	4845826	+	1258	2524	2106	1146	2871	1378	902	2589	1571	2469	1062	2640	651	-0.053964492	5.053047431	0.129038729	0.725036447	0.872273995
FBgn0072750	4_group3	7146888	7154293	-;-;-;-;-;-;-	2659	156	78	72	289	61	49	157	176	152	33	175	103	0.00493602	1.180150612	0.000175106	0.989637379	0.995398178
FBgn0072751	4_group3	7144298	7145294	-;-;-	699	134	39	84	39	23	7	187	107	196	76	224	43	1.236203309	0.770545755	7.497689728	0.016554113	0.111272432
FBgn0072753	4_group3	7126090	7129604	-;-;-;-	2344	153	21	197	15	0	1	107	63	89	45	78	22	0.165023301	0.295570325	0.030086235	0.865137735	0.940509098
FBgn0072754	4_group3	7064836	7072645	-;-;-;-;-;-;-;-	4834	1920	1121	1033	2464	509	788	1406	1021	1375	672	1502	446	-0.300954217	4.419670207	3.519168159	0.082648518	0.283877171
FBgn0072755	4_group3	6996722	7064017	-;-;-;-;-;-	3555	744	516	567	971	267	350	596	723	729	291	807	412	-0.084862641	3.445701545	0.256388133	0.620852981	0.817113664
FBgn0072756	4_group3	7143157	7144257	+;+;+;+;+	465	3131	1770	1892	3118	1113	964	5010	2405	3588	1306	4005	1642	0.451911644	5.478466304	12.33530475	0.003673157	0.046444571
FBgn0072757	4_group3	7117912	7123312	+;+;+	4106	2508	1056	1278	2066	552	578	2138	2010	2666	656	2729	2063	0.410562685	4.960136106	3.905386378	0.069121528	0.255908213
FBgn0072758	XL_group1a	1483601	1488493	-;-;-;-;-;-;-	2515	5068	3556	2725	5422	1439	1594	5432	3080	3891	1939	4620	1957	0.043376967	5.931398738	0.180517985	0.677681661	0.844477796
FBgn0072759	4_group3	7073089	7077564	+;+;+	4357	2056	1194	1070	1876	667	648	1565	1124	1350	840	1672	577	-0.075339882	4.488148481	0.430454785	0.522889304	0.754981833
FBgn0072763	4_group4	1580117	1580891	-;-	714	531	160	104	502	179	98	500	160	464	165	455	124	0.413293166	2.314980876	1.930733759	0.187368445	0.443994894
FBgn0072764	4_group4	1585169	1595742	+;+;+;+;+;+;+;+;+	2970	8733	8390	4797	7433	4018	4242	11341	7674	7571	3374	9716	4182	0.065785811	6.979748805	0.250519782	0.624841219	0.818430485
FBgn0072765	XL_group1e	3154845	3158484	-;-;-	1947	28073	22477	16199	32912	12069	11778	28145	17814	27758	12660	30106	8574	-0.062179482	8.561930556	0.359530728	0.558784949	0.778124067
FBgn0072766	4_group4	1578453	1580181	+;+;+	1605	8954	3627	4069	6138	1969	2146	7169	5112	7951	2001	7854	2871	0.138885076	6.456795745	0.736925126	0.405764193	0.666969667
FBgn0072767	4_group4	1565019	1566269	+	1251	10756	9345	5678	9422	4606	4210	11563	6285	6573	4240	11936	4264	-0.064059779	7.094849662	0.318197076	0.582025986	0.793558824
FBgn0072768	4_group4	1485729	1487697	-	1969	1215	1075	682	1381	360	365	1072	750	1283	458	1289	335	-0.064413612	3.919768035	0.166679414	0.689538404	0.851099168
FBgn0072769	4_group3	5484195	5487561	-;-;-;-;-	3095	41	0	0	40	18	10	29	0	0	2	0	5	-0.752115089	-2.002040103	0.315429408	0.583653187	0.794300867
FBgn0072772	XL_group1a	6060647	6061301	-	655	544	660	467	803	174	223	1094	643	764	484	861	337	0.509556093	3.421774422	7.398944684	0.017142176	0.11357158
FBgn0072774	XR_group8	675874	676593	+;+;+	607	168	285	143	314	113	70	236	202	210	111	214	68	-0.146258663	1.721555172	0.32569767	0.577663139	0.790324967
FBgn0072775	XR_group8	687964	689605	+;+;+	674	81	67	37	70	129	33	40	8	0	18	0	16	-2.145730341	-0.087074883	5.374613262	0.037468841	0.180724095
FBgn0072776	3	6554320	6555318	+	999	681	587	255	627	278	335	603	393	591	228	586	176	-0.175689019	3.035323777	1.051641745	0.323313397	0.59332222
FBgn0072781	2	10236334	10294639	-;-;-;-;-;-;-	2433	32	4	15	37	6	13	91	31	71	18	80	18	1.423465353	-0.67738339	7.939451782	0.014195077	0.102147526
FBgn0072786	Unknown_group_260	28979	29506	-	528	244	614	356	634	152	281	926	485	497	377	916	294	0.468651353	3.156740875	3.140439127	0.099131541	0.314636729
FBgn0072788	Unknown_group_260	17022	18385	-;-	1305	1289	1532	1101	1098	625	503	938	713	707	390	1105	341	-0.733004989	4.020170938	19.31882535	0.00067725	0.016069086
FBgn0072789	Unknown_group_260	836	2253	-;-;-;-	1245	6384	4593	3214	5404	2421	2257	6041	2947	4120	1948	5450	1809	-0.222154316	6.142879203	5.943795958	0.029408926	0.157926471
FBgn0072790	Unknown_group_260	51893	52424	+;+	455	418	708	468	1849	219	256	1392	847	1088	623	1527	590	0.651977554	3.88806301	4.866646186	0.046104016	0.203037386
FBgn0072792	XR_group6	4093671	4095070	-;-	1332	472	260	204	524	140	165	296	267	396	124	352	166	-0.209952052	2.354363448	1.19877999	0.292884402	0.56528736
FBgn0072794	XR_group8	6966559	6968889	-;-;-;-	2110	28	0	0	2	14	30	21	16	3	14	29	3	1.57273475	-1.725532475	1.693875388	0.215055564	0.481115166
FBgn0072795	XR_group8	7154000	7155015	-;-	958	55	65	65	73	47	50	89	70	84	31	97	32	-0.118141578	0.314968213	0.135409113	0.718644376	0.868713485
FBgn0072796	XR_group8	7128044	7146944	-;-;-;-;-	2672	873	525	485	955	315	259	805	669	688	367	936	666	0.240655998	3.567674767	1.577339907	0.230633225	0.498280401
FBgn0072797	XR_group8	7164891	7191032	-;-;-;-;-	4215	26	36	110	41	65	23	98	100	127	95	121	25	0.592189322	0.576204504	1.222376845	0.28837924	0.561504163
FBgn0072798	XR_group8	7335077	7335873	+;+;+	722	2518	1680	1469	2935	1006	1022	3202	2002	2716	968	3128	1261	0.18397507	5.175027302	2.967117971	0.107993779	0.331254682
FBgn0072803	XR_group8	7646087	7647576	-;-	1434	697	745	202	523	151	252	1131	674	773	187	522	489	0.429331505	3.253989148	2.055737389	0.174663856	0.429049682
FBgn0072804	XR_group8	7785307	7786784	+	1478	43341	31655	24345	32853	14816	20707	44667	27931	27606	20908	53046	26948	0.193318575	9.193391128	1.223407082	0.288184727	0.561261932
FBgn0072805	XR_group6	5918785	5920424	-;-;-	1500	302	288	121	343	92	122	296	166	239	118	327	84	-0.083838184	1.902180109	0.175469303	0.681942795	0.847208073
FBgn0072809	XR_group6	5642691	5643795	-;-	1015	231	170	92	212	41	49	248	167	256	115	281	73	0.533084146	1.50700786	4.610052088	0.050653027	0.213529565
FBgn0072810	XR_group8	6346476	6347819	-;-;-	1048	663	618	70	308	477	295	497	401	585	161	537	215	-0.040479818	2.951774362	0.007301987	0.933259747	0.971423523
FBgn0072811	2	23678421	23684938	+;+;+;+;+;+;+;+;+;+;+	3100	1121	724	609	1093	430	387	1384	927	1031	590	1055	615	0.350414868	3.957240627	7.064163556	0.019325523	0.122131654
FBgn0072812	XR_group6	5647239	5648306	+	1068	12	8	23	15	6	12	17	13	8	2	14	0	-0.943361979	-2.064935982	1.820715379	0.199619625	0.461121962
FBgn0072818	XR_group6	4250747	4254853	+	4107	0	78	183	36	0	12	189	385	643	0	127	372	1.84616199	1.745612986	4.930154166	0.047002156	0.205197341
FBgn0072819	XR_group6	3298554	3299400	+	847	698	1061	463	878	361	548	838	382	263	393	1230	337	-0.335537697	3.555675675	1.279846134	0.278140903	0.55143837
FBgn0072820	XR_group6	3172864	3176363	-;-;-;-;-	3247	663	336	264	475	202	227	283	370	485	153	470	282	-0.207760009	2.725142968	0.83044159	0.378270984	0.644957737
FBgn0072823	XR_group6	1862330	1864620	+;+;+;+;+;+	2004	20	92	12	13	20	14	41	14	28	19	21	8	-0.508328137	-0.962174107	0.770592193	0.395524063	0.659670897
FBgn0072824	XR_group6	1860929	1862120	+;+;+	1084	4160	2812	1981	4555	1840	1449	5113	2809	3615	1767	4691	1632	0.173201591	5.781468524	3.280184588	0.09262303	0.302246606
FBgn0072826	XR_group8	4268229	4269482	+;+;+;+	1058	1564	1186	608	1556	381	601	1117	656	833	483	1248	248	-0.377427905	3.956824331	4.994029446	0.043074797	0.195259118
FBgn0072827	XR_group8	4329021	4332623	-;-;-;-	2862	985	373	438	685	189	253	616	503	708	192	779	353	-0.039449624	3.181139277	0.04091938	0.842737101	0.930373476
FBgn0072828	XR_group8	4388775	4391655	+;+	912	22	30	11	22	10	12	38	41	43	2	64	38	0.402096692	-0.877483143	0.51245896	0.486382979	0.728770145
FBgn0072829	XR_group6	10026020	10028304	+;+;+;+;+;+	1256	518	431	271	377	93	125	527	386	523	176	576	376	0.379503776	2.737541282	4.117015864	0.062837015	0.241846762
FBgn0072830	XR_group6	10023869	10025900	-;-;-;-	1846	434	430	226	416	160	202	841	523	662	265	862	257	0.716229749	2.979839391	23.22493102	0.000309189	0.010091241
FBgn0072831	XR_group6	10525539	10526489	-;-	888	12	4	12	35	0	2	8	12	3	8	23	10	0.124666508	-2.131944616	0.025326767	0.875932768	0.945116512
FBgn0072832	XR_group6	10551066	10555778	-;-;-;-;-;-;-;-	4095	653	201	318	311	124	83	457	433	575	160	502	291	0.396286786	2.631483717	2.176230427	0.163298327	0.414869836
FBgn0072833	XR_group6	5973844	5974519	-	676	205	103	69	196	69	38	162	144	163	33	182	49	-0.031717761	1.050609132	0.010010586	0.921786	0.965846543
FBgn0072834	XR_group6	6069761	6070210	-	450	17	13	10	11	21	5	28	70	59	26	100	120	2.035537601	-0.194244937	8.861194022	0.010423855	0.08494646
FBgn0072835	XR_group6	6183063	6183791	-;-	669	608	429	337	613	207	233	668	404	733	180	671	258	0.065764337	3.001066892	0.189963362	0.669896636	0.840456234
FBgn0072837	XR_group6	9095897	9097134	+;+	996	164	77	18	408	22	33	66	65	65	10	63	45	-1.21213005	0.51619099	3.502100495	0.083316449	0.285149495
FBgn0072838	XR_group6	8647972	8651117	-;-;-;-	2959	56	21	50	71	6	1	229	101	131	95	329	21	2.101450752	0.642395769	11.74717848	0.00433881	0.051369915
FBgn0072840	4_group1	1118875	1120840	+;+;+;+;+	1680	13330	7279	4978	13019	4066	6091	11428	6720	8488	4043	11082	3301	-0.134571034	7.145756865	1.252733614	0.282722512	0.555511781
FBgn0072841	XR_group6	7573338	7576291	+;+;+	2352	78	36	76	61	14	41	74	61	106	27	68	72	0.144518531	0.240268742	0.142783691	0.711456014	0.865139467
FBgn0072844	XR_group6	7784671	7791245	-;-;-;-;-	2941	54	22	19	62	30	35	33	27	31	6	42	10	-0.711876714	-0.711973765	2.115758439	0.168845684	0.422171699
FBgn0072848	XL_group1a	1455314	1467102	-;-;-;-;-;-;-;-;-;-;-;-;-;-;-	4270	28709	17106	12912	22783	8959	9698	26393	16720	18911	11259	26129	11508	0.132234918	8.340769028	2.09738382	0.170578203	0.423883772
FBgn0072850	XR_group6	9964935	9966069	-;-	1082	220	189	136	175	94	126	383	227	257	109	316	128	0.407130999	1.87709749	3.892287992	0.069534618	0.257045188
FBgn0072853	XR_group8	2359263	2360918	+;+;+	1516	84	19	35	54	19	22	843	485	923	493	1015	338	4.179604667	2.712520907	249.4008925	4.89E-10	7.98E-07
FBgn0072854	XR_group5	562843	564019	-;-;-	1033	1473	1577	1335	1557	618	1474	1737	894	1325	657	1354	623	-0.48330212	4.574319819	4.361002136	0.056506442	0.228499481
FBgn0072855	XR_group6	11732918	11735087	+;+	2096	241	161	84	187	72	55	222	76	115	44	187	86	-0.212563034	1.195142829	0.597068549	0.453133278	0.703227626
FBgn0072856	XR_group8	466871	470216	-;-;-;-;-;-;-;-	2736	24121	19414	10644	17198	8650	8830	23549	11742	13497	7378	18865	8447	-0.163847337	8.04769453	1.821217378	0.199561425	0.461060037
FBgn0072857	XR_group8	470237	471354	-;-;-;-;-	748	904	743	368	887	203	245	964	633	897	314	891	484	0.268167125	3.488552247	2.761976737	0.119767589	0.350473515
FBgn0072858	XR_group6	4681087	4682457	+;+	1308	13	38	0	0	0	0	62	41	43	25	29	9	2.120964127	-1.252197038	4.05392621	0.064772254	0.246393014
FBgn0072859	XR_group6	4674169	4679441	-;-;-;-;-	3151	0	2	7	6	0	1	38	20	8	6	36	9	2.581699697	-2.123598157	10.59971382	0.00605297	0.061781359
FBgn0072860	XR_group6	4685992	4686541	-;-	482	0	36	12	6	10	27	29	35	12	6	25	5	-0.195873387	-1.434013082	0.049088452	0.828002837	0.923318918
FBgn0072861	XL_group1e	8290428	8292651	+;+;+;+	2026	2727	2003	1517	3432	954	1059	2248	1761	2257	1338	2372	803	-0.098015453	5.103879534	0.561848118	0.466492388	0.713811846
FBgn0072862	XL_group1e	8311992	8314484	-;-;-;-	2279	94	49	101	109	22	6	31	72	83	4	62	53	-1.020266281	0.103401802	4.566459301	0.05160962	0.216149245
FBgn0072864	XL_group1a	5437435	5438025	+;+;+	472	600	208	257	410	251	143	530	197	386	119	409	112	-0.204418492	2.44138531	0.678802572	0.424442998	0.680424082
FBgn0072865	2	13175587	13177721	+;+;+;+	1935	2110	1991	1271	2224	865	1058	2494	1660	2146	861	2407	781	-0.028823972	4.922609079	0.065142964	0.802426004	0.910890256
FBgn0072867	XL_group1a	5641307	5642302	+;+	740	12035	5362	5332	9002	3128	3339	7140	4973	7895	3046	8240	3971	-0.16605543	6.802464161	1.553399085	0.23401511	0.502200434
FBgn0072868	XL_group1a	5649114	5654527	+;+;+;+;+	1020	1877	1404	1087	1628	695	656	1809	1625	1436	726	2055	1593	0.217336897	4.724875703	1.392148983	0.258596181	0.531412076
FBgn0072869	4_group1	1290903	1291789	+	887	1636	799	817	1518	536	554	1032	658	983	529	990	270	-0.400017686	3.978808869	7.180862991	0.018529483	0.11904747
FBgn0072870	XL_group1a	5660735	5661388	+;+	593	466	180	160	397	161	99	371	293	360	149	424	139	0.264366364	2.261116187	1.598510948	0.227695952	0.495726422
FBgn0072871	XL_group1a	5667506	5669098	+;+;+;+;+	1351	531	390	275	962	243	207	648	199	441	208	375	201	-0.298137324	2.816844346	1.730059984	0.210499035	0.475265078
FBgn0072872	XL_group1a	5669196	5671048	+	1853	1514	1389	608	1299	502	496	1322	880	719	462	1251	467	-0.224789122	4.045303395	2.216259865	0.159752058	0.410347425
FBgn0072873	XL_group1a	5686162	5687796	-;-;-;-;-	1390	2111	2378	1760	3604	1092	1064	2904	1821	2844	844	2569	1013	-0.189910942	5.182051074	1.889294156	0.191866748	0.450511099
FBgn0072874	XL_group1a	5688031	5689066	+;+	593	21913	15043	9219	17037	6195	6856	23443	13521	16041	6911	24862	12091	0.246947524	8.030032401	3.611976732	0.07912731	0.276700667
FBgn0072876	XL_group1e	12510372	12518275	+;+;+;+;+;+;+;+;+;+;+;+;+	4845	4428	3239	2097	4526	1651	1387	4038	3361	3960	1629	4776	2024	0.114258217	5.815672697	1.337938439	0.267633136	0.541124432
FBgn0072878	XL_group1e	412735	415508	-	2774	2909	1931	1870	2570	955	1075	2843	1959	2872	1136	2829	949	0.025233139	5.183386631	0.04862372	0.828804822	0.923920791
FBgn0072879	XL_group1a	5643253	5644750	-;-;-;-	1263	767	619	528	657	178	318	809	661	889	265	868	299	0.099858434	3.36771646	0.39311971	0.541215922	0.767114287
FBgn0072880	XL_group1a	5663119	5665740	-;-;-;-;-;-	2291	359	171	96	278	49	30	224	110	246	93	180	70	0.045788205	1.446008326	0.018032447	0.895176253	0.953391464
FBgn0072882	XL_group1a	5713691	5718162	+;+;+	4343	86	79	71	89	24	16	214	123	155	40	123	106	0.891022831	0.793080104	9.296003424	0.009057928	0.078362112
FBgn0072883	XL_group1e	941075	944995	+;+;+	3436	30560	21019	19966	31856	11304	12811	27285	18649	31127	12658	30104	14565	-0.027871204	8.667110347	0.06382951	0.804382489	0.911335237
FBgn0072884	XL_group1e	930587	934416	-;-	3778	462	306	242	295	172	231	448	377	527	197	328	180	0.158691759	2.582243204	0.517925718	0.484110116	0.727226873
FBgn0072885	XL_group1e	934523	940753	-;-;-	4917	3157	2621	1742	4120	1179	1475	2826	2016	2662	1595	3130	1147	-0.09467526	5.414483953	0.650400924	0.434070917	0.689136262
FBgn0072886	XL_group1e	945810	948777	-;-;-;-;-;-	2591	5621	3015	2430	4840	1095	2328	4136	3567	4204	2145	4678	2076	0.108742592	5.942256594	0.433125967	0.521622549	0.753893956
FBgn0072888	XL_group1e	959119	964076	+;+;+;+;+	2429	2333	1619	1233	2452	743	904	3256	1242	1934	777	3260	688	0.107477247	4.891150503	0.429764317	0.52321767	0.755197367
[truncated: 12,688 more rows]
